# Supplementary material
Source: PubMed Central journal article supplement (PMC4777874)
Supplement: NIHMS760374-supplement-Kim59.pdf [file NIHMS760374-supplement-Kim59.pdf]

# Index of olfactory receptor spectra examples from the Kim *et al.* paper

| Slide | Olfactory receptor | Peptide                                     |
|-------|--------------------|---------------------------------------------|
| 3     | OR10G4             | DKVAHPQR                                    |
| 4     | OR10K1             | IPSSVGR                                     |
| 5     | OR10K2             | VNETVVR                                     |
| 6     | OR11A1             | FCGPNHIDQFYCDFMLFVGLACSDPR                  |
| 7     | OR13C8             | IPSTEGK                                     |
| 8     | OR13C8             | KKVSFSGCMVQMFISFAMGATECMILGTMALDR           |
| 9     | OR13G1             | EMQAGIR                                     |
| 10    | OR14I1             | IYFLQK                                      |
| 11    | OR14I1             | NLSVLDLCYISVTVPK                            |
| 12    | OR1A1              | MLANHLLGSKSISFSGGCLTQMYFMIALGNTDSYILAAMAYDR |
| 13    | OR1A2              | FISFGGCLMQMYFMIALAKADSYTLAAMAYDR            |
| 14    | OR1B1              | IGAAILR                                     |
| 15    | OR1J1              | MLMNMQTQHLAVFYK                             |
| 16    | OR1K1              | AMCAALVGMAWLVSHVHSLLYILLMAR                 |
| 17    | OR1L1              | TISYSECLTQMYFFLAFGNTDSYLLAAMAIDR            |
| 18    | OR1L4              | LSFCASHIK                                   |
| 19    | OR1L8              | ILTTVLK                                     |
| 20    | OR1M1              | FVAICHPLHYAK                                |
| 21    | OR2A7              | MMQTFLFSTFAVTECLLLVMSYDLYVAICHPLR           |
| 22    | OR2M4              | SISLAGCGTQIFFYVSLGAECFLAVMAYDR              |
| 23    | OR2T11             | LLADMVSK                                    |
| 24    | OR2T33             | LHTPMYFLLSQLSLMDMMLVSTTVPK                  |
| 25    | OR2T5              | MANHTGKLDFFILMGLFR                          |
| 26    | OR2W3              | EMPALIR                                     |
| 27    | OR3A1              | AVGIFNTVINPMLNPIIYSFR                       |
| 28    | OR4A15             | HLSPTPSEEHMK                                |
| 29    | OR4A15             | YMAICKPLHELITMNR                            |
| 30    | OR4C13             | SPMYFFLAYLSFIDACYSSVNTPK                    |
| 31    | OR4D9              | VLIDLLSETKTISFSGCVTQMFFFHLLGGADVFSLSVMAFDR  |
| 32    | OR4E2              | ALSTCSAHFMVVALFFGPCIFIYTRPDTSFSDIK          |

# Index of olfactory receptor spectra examples from the Kim *et al.* paper

| Slide | Olfactory receptor | Peptide                                            |
|-------|--------------------|----------------------------------------------------|
| 33    | OR4F6              | TISFGGCVVQIFFIHAVGGTEMVLLIAMAFDRYVAICKPLHYLTIMNPQR |
| 34    | OR4N4              | VISYRGKITQLFFLHFLGGEGLLLVMAFDRIAICRPLHCSTVMNPR     |
| 35    | OR4P4              | YVAICKPLHYTIIMSR                                   |
| 36    | OR4X2              | LISDLLAERK                                         |
| 37    | OR51A4             | SMLLVLPFPFTLR                                      |
| 38    | OR51E1             | TVLGLTR                                            |
| 39    | OR51E2             | DLQAVGGK                                           |
| 40    | OR51F1             | AMLSLLTK                                           |
| 41    | OR52A5             | TTVISHSYCEHMAIVK                                   |
| 42    | OR52B2             | EGVAHR                                             |
| 43    | OR56A3             | AAMFILTR                                           |
| 44    | OR5C1              | NSENLTRAAVAPAEFVLLGITNRWDLR                        |
| 45    | OR5I1              | YCDKNVINHFFCDLPPLK                                 |
| 46    | OR5K1              | MLENFFSENK                                         |
| 47    | OR5K4              | AGNLHSMIHVGLLLR                                    |
| 48    | OR5K4              | MTTGAFKAGNLHSMIHVGLLLR                             |
| 49    | OR5M10             | TISYAGCFTQCLLFIALVITEFYFLASMALDR                   |
| 50    | OR5T2              | SYSIYKSTVNIPLSHGVVHSFCHNMNCNFMHIFK                 |
| 51    | OR6C1              | LQTPMYFFLR                                         |
| 52    | OR6C75             | KKAFSTCSSHMIVVSISYSSCIFMYIK                        |
| 53    | OR6F1              | DALDLIK                                            |
| 54    | OR6N2              | IIGAVLK                                            |
| 55    | OR6N2              | TISFAGCLLQTYFFHSLGASECYLLTAMAYDR                   |
| 56    | OR6P1              | AMYTFNHNKIISVLYTIIVPFFNPAIYCLR                     |
| 57    | OR7A17             | FVAICHPLHYTVIMNPR                                  |
| 58    | OR7C2              | TSLAASVMYTMVTPMLNPFYSLRNKDMK                       |
| 59    | OR8K1              | SSHTLAIDK                                          |
| 60    | OR9A2              | SNSLDHFYCDRGQLLK                                   |
| 61    | OR9I1              | NNLTRVTEFILMGFMDHPK                                |
| 62    | OR5K2              | VEENHTMKNEFILTGFTHPELK                             |
| 63    | OR5K4              | MLENFFSEDR                                         |

## MS/MS spectrum

### Ions:

a  1+  2+  3+

b  1+  2+  3+

c  1+  2+  3+

x  1+  2+  3+

y  1+  2+  3+

z  1+  2+  3+

[Deselect All](#)

### Neutral Loss:

H<sub>2</sub>O (o)

NH<sub>3</sub> (\*)

Mass Type:

Mono  Avg

Mass Tolerance: 0.05 Da

[Update](#)

Peak Assignment:

Most Intense

Nearest Match

Peak Labels:

Ion  m/z

None

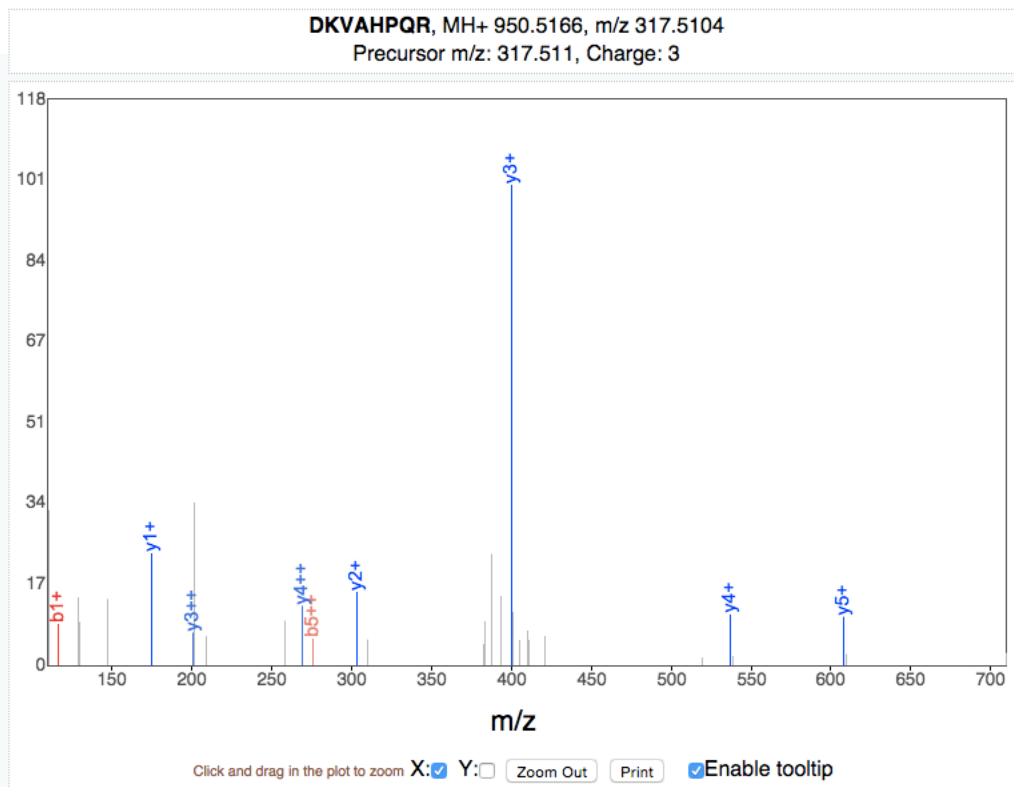

| b+              | b2+             | Seq   | y+              | y2+             |
|-----------------|-----------------|-------|-----------------|-----------------|
| <b>116.0342</b> | 58.5207         | 1 D 8 |                 |                 |
| 244.1292        | 122.5682        | 2 K 7 | 835.4897        | 418.2485        |
| 343.1976        | 172.1024        | 3 V 6 | 707.3947        | 354.2010        |
| 414.2347        | 207.6210        | 4 A 5 | <b>608.3263</b> | 304.6668        |
| 551.2936        | <b>276.1504</b> | 5 H 4 | <b>537.2892</b> | <b>269.1482</b> |
| 648.3464        | 324.6768        | 6 P 3 | <b>400.2303</b> | <b>200.6188</b> |
| 776.4050        | 388.7061        | 7 Q 2 | <b>303.1775</b> | 152.0924        |
|                 |                 | 8 R 1 | <b>175.1190</b> | 88.0631         |

## SRM transitions

| Transition ID   | Precursor m/z | Precursor charge | Fragment m/z | Relative intensity |
|-----------------|---------------|------------------|--------------|--------------------|
| DKVAHPQR.3.y3.1 | 331.514       | 3                | 400.23       | 100                |
| DKVAHPQR.3.y1.1 | 331.514       | 3                | 175.119      | 23                 |
| DKVAHPQR.3.y2.1 | 331.514       | 3                | 303.178      | 15                 |
| DKVAHPQR.3.y4.2 | 331.514       | 3                | 269.148      | 12                 |
| DKVAHPQR.3.y4.1 | 331.514       | 3                | 537.289      | 10                 |
| DKVAHPQR.3.y5.1 | 331.514       | 3                | 608.326      | 10                 |
| DKVAHPQR.3.y3.2 | 331.514       | 3                | 200.619      | 6                  |

## MS/MS spectrum

### Ions:

a  1+  2+  3+

b  1+  2+  3+

c  1+  2+  3+

x  1+  2+  3+

y  1+  2+  3+

z  1+  2+  3+

[Deselect All](#)

### Neutral Loss:

H<sub>2</sub>O (o)

NH<sub>3</sub> (\*)

Mass Type:

Mono  Avg

Mass Tolerance: 0.05 Da

[Update](#)

Peak Assignment:

Most Intense

Nearest Match

Peak Labels:

Ion  m/z

None

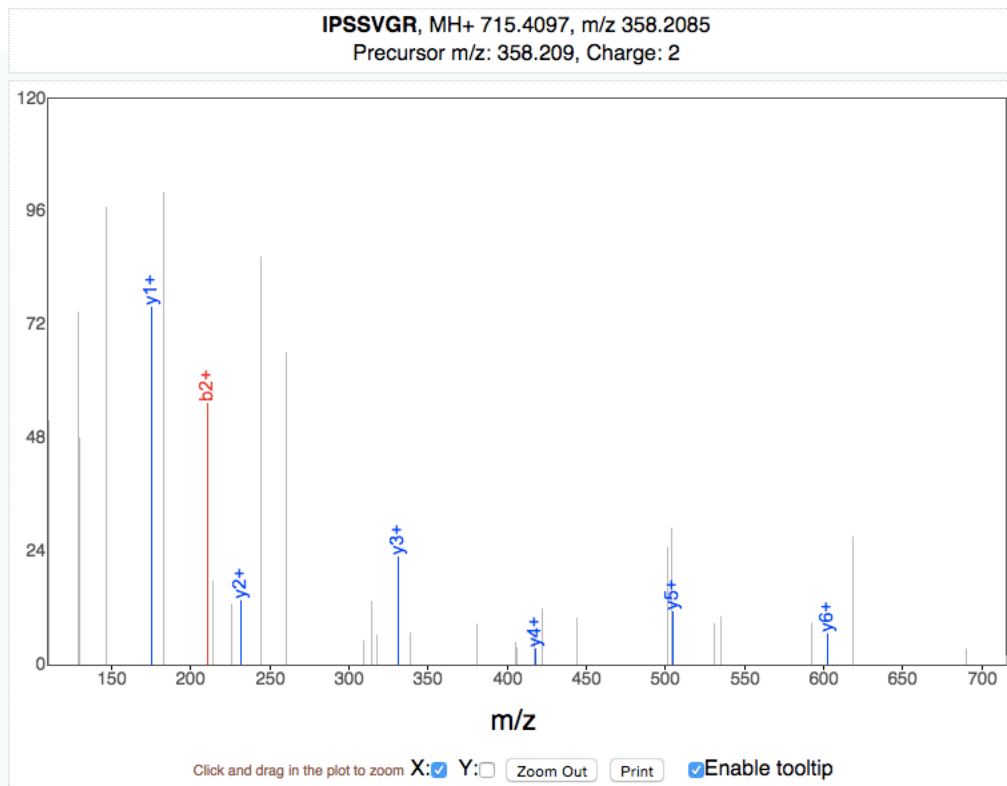

|          | b+ | Seq | y+ |
|----------|----|-----|----|
| 114.0913 | 1  | I   | 7  |
| 211.1441 | 2  | P   | 6  |
| 298.1761 | 3  | S   | 5  |
| 385.2082 | 4  | S   | 4  |
| 484.2766 | 5  | V   | 3  |
| 541.2980 | 6  | G   | 2  |
|          | 7  | R   | 1  |

## SRM transitions

| Transition ID  | Precursor m/z | Precursor charge | Fragment m/z | Relative intensity |
|----------------|---------------|------------------|--------------|--------------------|
| IPSSVGR.2.y1.1 | 379.214       | 2                | 175.119      | 100                |
| IPSSVGR.2.y3.1 | 379.214       | 2                | 331.209      | 30                 |
| IPSSVGR.2.b4.2 | 379.214       | 2                | 214.113      | 23                 |
| IPSSVGR.2.y2.1 | 379.214       | 2                | 232.14       | 17                 |
| IPSSVGR.2.y5.1 | 379.214       | 2                | 505.273      | 14                 |
| IPSSVGR.2.y6.1 | 379.214       | 2                | 602.326      | 8                  |
| IPSSVGR.2.y4.1 | 379.214       | 2                | 418.241      | 4                  |

## MS/MS spectrum

### Ions:

a  1+  2+  3+

b  1+  2+  3+

c  1+  2+  3+

x  1+  2+  3+

y  1+  2+  3+

z  1+  2+  3+

[Deselect All](#)

### Neutral Loss:

H<sub>2</sub>O (o)

NH<sub>3</sub> (\*)

Mass Type:

Mono  Avg

Mass Tolerance: 0.05 Da

[Update](#)

Peak Assignment:

Most Intense

Nearest Match

Peak Labels:

Ion  m/z

None

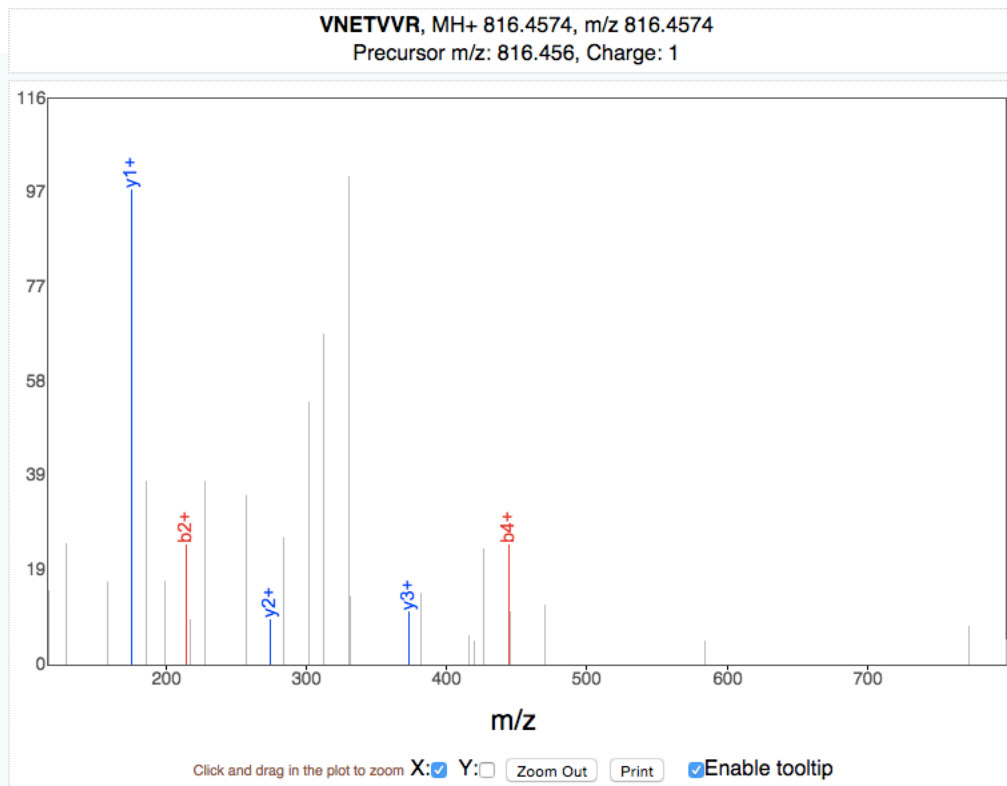

|                 | b+ | Seq | y+ |
|-----------------|----|-----|----|
| 100.0757        | 1  | V   | 7  |
| <b>214.1186</b> | 2  | N   | 6  |
| 343.1612        | 3  | E   | 5  |
| <b>444.2089</b> | 4  | T   | 4  |
| 543.2773        | 5  | V   | 3  |
| 642.3457        | 6  | V   | 2  |
|                 | 7  | R   | 1  |

## SRM transitions

| Transition ID  | Precursor m/z | Precursor charge | Fragment m/z | Relative intensity |
|----------------|---------------|------------------|--------------|--------------------|
| VNETVVR.1.y1.1 | 858.468       | 1                | 175.119      | 100                |
| VNETVVR.1.y5.2 | 858.468       | 1                | 302.177      | 55                 |
| VNETVVR.1.y3.1 | 858.468       | 1                | 373.256      | 11                 |
| VNETVVR.1.y2.1 | 858.468       | 1                | 274.187      | 9                  |

### MS/MS spectrum

#### Ions:

a  1+  2+  3+

b  1+  2+  3+

c  1+  2+  3+

x  1+  2+  3+

y  1+  2+  3+

z  1+  2+  3+

[\[Deselect All\]](#)

#### Neutral Loss:

H<sub>2</sub>O (o)

NH<sub>3</sub> (\*)

#### Mass Type:

Mono  Avg

Mass Tolerance: 0.05 Da

[Update](#)

#### Peak Assignment:

Most Intense

Nearest Match

#### Peak Labels:

Ion  m/z

None

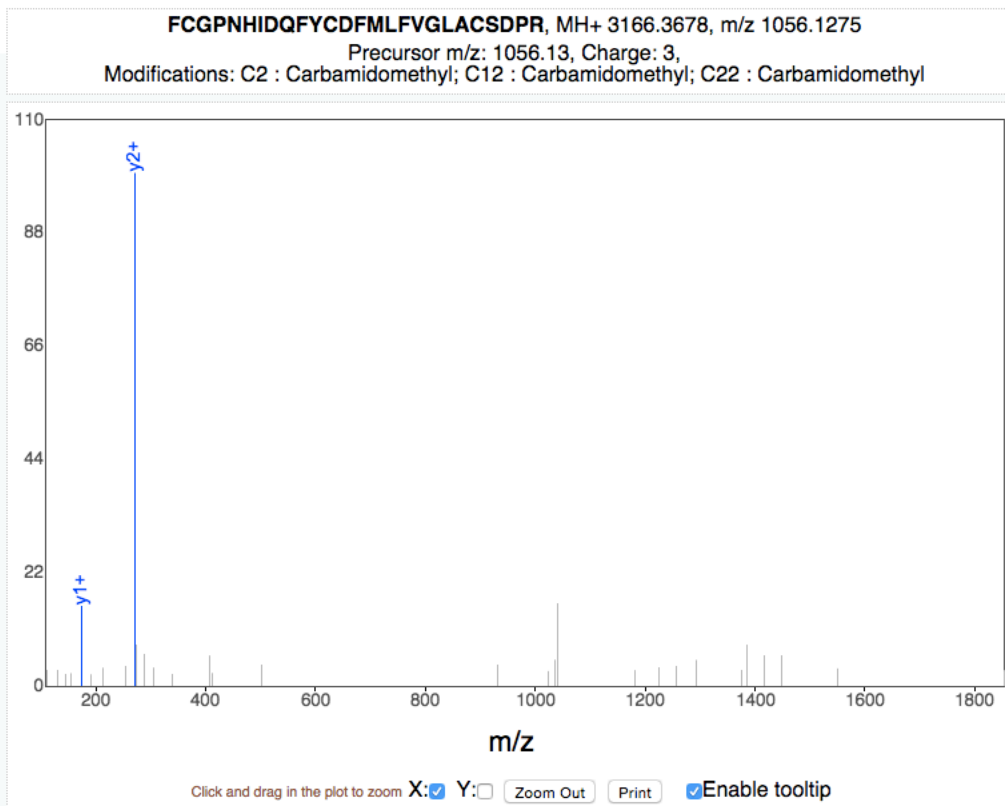

| b+        | b2+       | Seq     | y+              | y2+       |
|-----------|-----------|---------|-----------------|-----------|
| 148.0757  | 74.5415   | 1 F 26  |                 |           |
| 308.1063  | 154.5568  | 2 C 25  | 3019.2994       | 1510.1533 |
| 365.1278  | 183.0675  | 3 G 24  | 2859.2688       | 1430.1380 |
| 462.1806  | 231.5939  | 4 P 23  | 2802.2473       | 1401.6273 |
| 576.2235  | 288.6154  | 5 N 22  | 2705.1945       | 1353.1009 |
| 713.2824  | 357.1448  | 6 H 21  | 2591.1516       | 1296.0794 |
| 826.3665  | 413.6869  | 7 I 20  | 2454.0927       | 1227.5500 |
| 941.3934  | 471.2003  | 8 D 19  | 2341.0086       | 1171.0079 |
| 1069.4520 | 535.2296  | 9 Q 18  | 2225.9817       | 1113.4945 |
| 1216.5204 | 608.7638  | 10 F 17 | 2097.9231       | 1049.4652 |
| 1379.5837 | 690.2955  | 11 Y 16 | 1950.8547       | 975.9310  |
| 1539.6144 | 770.3108  | 12 C 15 | 1787.7914       | 894.3993  |
| 1654.6413 | 827.8243  | 13 D 14 | 1627.7607       | 814.3840  |
| 1801.7097 | 901.3585  | 14 F 13 | 1512.7338       | 756.8705  |
| 1932.7502 | 966.8787  | 15 M 12 | 1365.6654       | 683.3363  |
| 2045.8343 | 1023.4208 | 16 L 11 | 1234.6249       | 617.8161  |
| 2192.9027 | 1096.9550 | 17 F 10 | 1121.5408       | 561.2740  |
| 2291.9711 | 1146.4892 | 18 V 9  | 974.4724        | 487.7398  |
| 2348.9926 | 1174.9999 | 19 G 8  | 875.4040        | 438.2056  |
| 2462.0766 | 1231.5420 | 20 L 7  | 818.3825        | 409.6949  |
| 2533.1138 | 1267.0605 | 21 A 6  | 705.2984        | 353.1529  |
| 2693.1444 | 1347.0758 | 22 C 5  | 634.2613        | 317.6343  |
| 2780.1764 | 1390.5919 | 23 S 4  | 474.2307        | 237.6190  |
| 2895.2034 | 1448.1053 | 24 D 3  | 387.1987        | 194.1030  |
| 2992.2561 | 1496.6317 | 25 P 2  | <b>272.1717</b> | 136.5895  |
|           |           | 26 R 1  | <b>175.1190</b> | 88.0631   |

### SRM transitions

| Transition ID                     | Precursor m/z | Precursor charge | Fragment m/z | Relative intensity |
|-----------------------------------|---------------|------------------|--------------|--------------------|
| FcGPNHIDQFYcDFMLFVGLAcSDPR.3.y2.1 | 1056.13       | 3                | 272.172      | 100                |
| FcGPNHIDQFYcDFMLFVGLAcSDPR.3.y1.1 | 1056.13       | 3                | 175.119      | 15                 |

## MS/MS spectrum

### Ions:

a  1+  2+  3+

b  1+  2+  3+

c  1+  2+  3+

x  1+  2+  3+

y  1+  2+  3+

z  1+  2+  3+

[\[Deselect All\]](#)

### Neutral Loss:

H<sub>2</sub>O (o)

NH<sub>3</sub> (\*)

### Mass Type:

Mono  Avg

Mass Tolerance:  Da

### Peak Assignment:

Most Intense

Nearest Match

### Peak Labels:

Ion  m/z

None

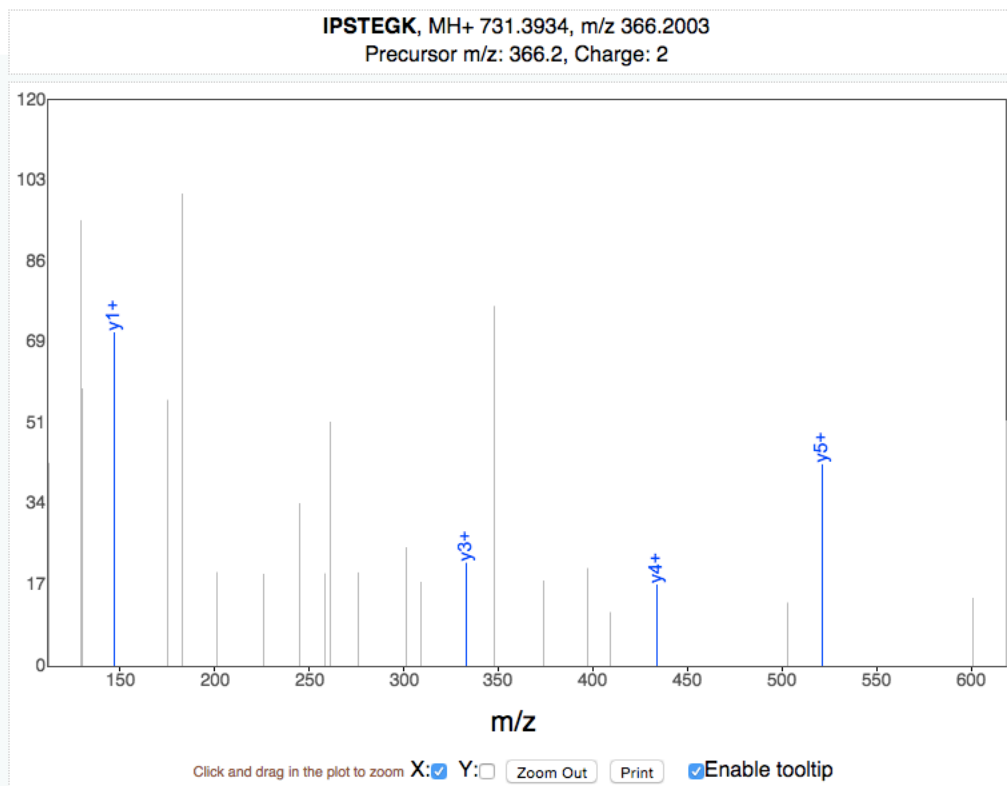

|          | b+ | Seq | y+                         |
|----------|----|-----|----------------------------|
| 114.0913 | 1  | I   | 7                          |
| 211.1441 | 2  | P   | 6 618.3093                 |
| 298.1761 | 3  | S   | 5 <a href="#">521.2566</a> |
| 399.2238 | 4  | T   | 4 <a href="#">434.2245</a> |
| 528.2664 | 5  | E   | 3 <a href="#">333.1769</a> |
| 585.2879 | 6  | G   | 2 204.1343                 |
|          | 7  | K   | 1 <a href="#">147.1128</a> |

## SRM transitions

| Transition ID  | Precursor m/z | Precursor charge | Fragment m/z | Relative intensity |
|----------------|---------------|------------------|--------------|--------------------|
| IPSTEGK.2.y1.1 | 387.206       | 2                | 147.113      | 100                |
| IPSTEGK.2.y6.1 | 387.206       | 2                | 618.309      | 73                 |
| IPSTEGK.2.y5.2 | 387.206       | 2                | 261.132      | 73                 |
| IPSTEGK.2.y5.1 | 387.206       | 2                | 521.257      | 60                 |
| IPSTEGK.2.y3.1 | 387.206       | 2                | 333.177      | 30                 |
| IPSTEGK.2.y4.1 | 387.206       | 2                | 434.225      | 24                 |

## MS/MS spectrum

### Ions:

- 1+  2+  3+  
 1+  2+  3+  
 1+  2+  3+  
 1+  2+  3+  
 1+  2+  3+  
 1+  2+  3+

[\[Deselect All\]](#)

### Neutral Loss:

- H<sub>2</sub>O (o)  
 NH<sub>3</sub> (\*)

### Mass Type:

- Mono  Avg

Mass Tolerance: 0.05 Da

[Update](#)

### Peak Assignment:

- Most Intense  
 Nearest Match

### Peak Labels:

- Ion  m/z  
 None

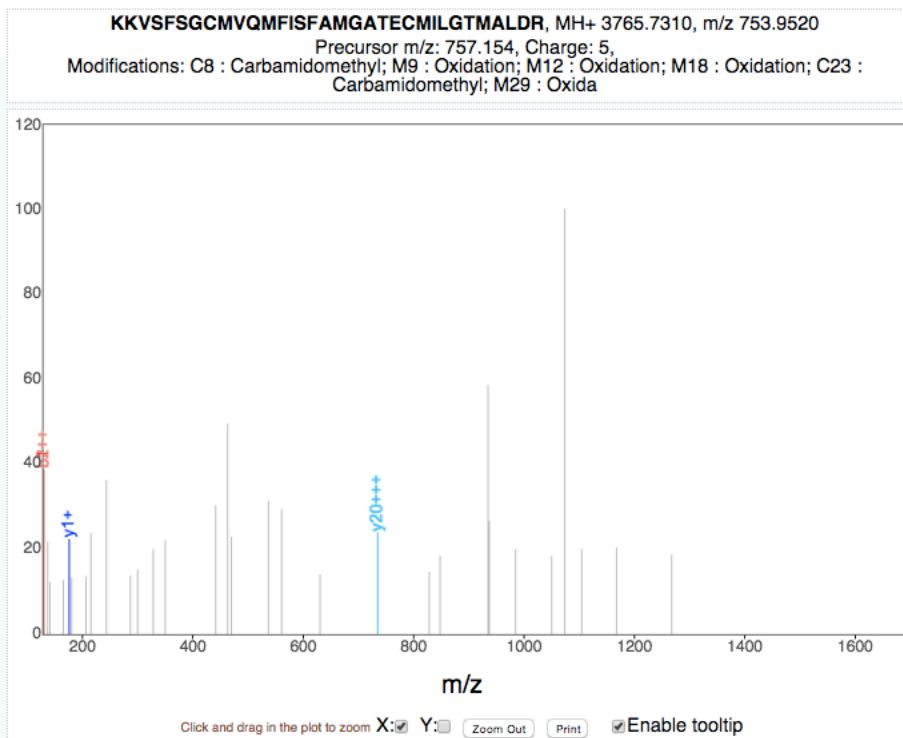

| b+        | b2+       | b3+       | Seq     | y+        | y2+       | y3+       |
|-----------|-----------|-----------|---------|-----------|-----------|-----------|
| 129.1022  | 65.0548   | 43.7056   | 1 K 33  |           |           |           |
| 257.1972  | 129.1022  | 86.4039   | 2 K 32  | 3637.6360 | 1819.3216 | 1213.2168 |
| 356.2656  | 178.6364  | 119.4267  | 3 V 31  | 3509.5410 | 1755.2742 | 1170.5185 |
| 443.2976  | 222.1525  | 148.4374  | 4 S 30  | 3410.4726 | 1705.7399 | 1137.4957 |
| 590.3661  | 295.6867  | 197.4602  | 5 F 29  | 3323.4406 | 1662.2239 | 1108.4850 |
| 677.3981  | 339.2027  | 226.4709  | 6 S 28  | 3176.3722 | 1588.6897 | 1059.4622 |
| 734.4196  | 367.7134  | 245.4780  | 7 G 27  | 3089.3401 | 1545.1737 | 1030.4516 |
| 894.4502  | 447.7287  | 298.8216  | 8 C 26  | 3032.3187 | 1516.6630 | 1011.4444 |
| 1041.4856 | 521.2464  | 347.8334  | 9 M 25  | 2872.2880 | 1436.6477 | 958.1009  |
| 1140.5540 | 570.7806  | 380.8562  | 10 V 24 | 2725.2526 | 1363.1300 | 909.0891  |
| 1268.6126 | 634.8099  | 423.5424  | 11 Q 23 | 2626.1842 | 1313.5957 | 876.0663  |
| 1415.6480 | 708.3276  | 472.5542  | 12 M 22 | 2498.1256 | 1249.5665 | 833.3801  |
| 1562.7164 | 781.8618  | 521.5770  | 13 F 21 | 2351.0902 | 1176.0488 | 784.3683  |
| 1675.8005 | 838.4039  | 559.2717  | 14 I 20 | 2204.0218 | 1102.5146 | 735.3455  |
| 1762.8325 | 881.9199  | 588.2823  | 15 S 19 | 2090.9378 | 1045.9725 | 697.6508  |
| 1909.9009 | 955.4541  | 637.3052  | 16 F 18 | 2003.9057 | 1002.4565 | 668.6401  |
| 1980.9380 | 990.9727  | 660.9842  | 17 A 17 | 1856.8373 | 928.9223  | 619.6173  |
| 2127.9734 | 1064.4903 | 709.9960  | 18 M 16 | 1785.8002 | 893.4037  | 595.9383  |
| 2184.9949 | 1093.0011 | 729.0031  | 19 G 15 | 1638.7648 | 819.8860  | 546.9265  |
| 2256.0320 | 1128.5196 | 752.6822  | 20 A 14 | 1581.7433 | 791.3753  | 527.9193  |
| 2357.0797 | 1179.0435 | 786.3647  | 21 T 13 | 1510.7062 | 755.8568  | 504.2403  |
| 2486.1223 | 1243.5648 | 829.3789  | 22 E 12 | 1409.6586 | 705.3329  | 470.5577  |
| 2646.1529 | 1323.5801 | 882.7225  | 23 C 11 | 1280.6160 | 640.8116  | 427.5435  |
| 2777.1934 | 1389.1003 | 926.4027  | 24 M 10 | 1120.5853 | 560.7963  | 374.2000  |
| 2890.2775 | 1445.6424 | 964.0973  | 25 I 9  | 989.5448  | 495.2761  | 330.5198  |
| 3003.3615 | 1502.1844 | 1001.7920 | 26 L 8  | 876.4608  | 438.7340  | 292.8251  |
| 3060.3830 | 1530.6951 | 1020.7992 | 27 G 7  | 763.3767  | 382.1920  | 255.1304  |
| 3161.4307 | 1581.2190 | 1054.4817 | 28 T 6  | 706.3552  | 353.6813  | 236.1233  |
| 3292.4712 | 1646.7392 | 1098.1619 | 29 M 5  | 605.3076  | 303.1574  | 202.4407  |
| 3363.5083 | 1682.2578 | 1121.8409 | 30 A 4  | 474.2671  | 237.6372  | 158.7605  |
| 3476.5923 | 1738.7998 | 1159.5356 | 31 L 3  | 403.2300  | 202.1186  | 135.0815  |
| 3591.6193 | 1796.3133 | 1197.8779 | 32 D 2  | 290.1459  | 145.5766  | 97.3868   |
|           |           |           | 33 R 1  | 175.1190  | 88.0631   | 59.0445   |

## SRM transitions

| Transition ID                            | Precursor m/z | Precursor charge | Fragment m/z | Relative intensity |
|------------------------------------------|---------------|------------------|--------------|--------------------|
| KKVSFSGcmVQmFISFAMGATEcMILGTmALDR.5.b8.1 | 762.354       | 5                | 936.461      | 100                |
| KKVSFSGcmVQmFISFAMGATEcMILGTmALDR.5.y1.1 | 762.354       | 5                | 175.119      | 84                 |
| KKVSFSGcmVQmFISFAMGATEcMILGTmALDR.5.b2.1 | 762.354       | 5                | 299.208      | 57                 |



## MS/MS spectrum

### Ions:

a  1+  2+  3+

b  1+  2+  3+

c  1+  2+  3+

x  1+  2+  3+

y  1+  2+  3+

z  1+  2+  3+

[\[Deselect All\]](#)

### Neutral Loss:

H<sub>2</sub>O (o)

NH<sub>3</sub> (\*)

### Mass Type:

Mono  Avg

Mass Tolerance:  Da

[Update](#)

### Peak Assignment:

Most Intense

Nearest Match

### Peak Labels:

Ion  m/z

None

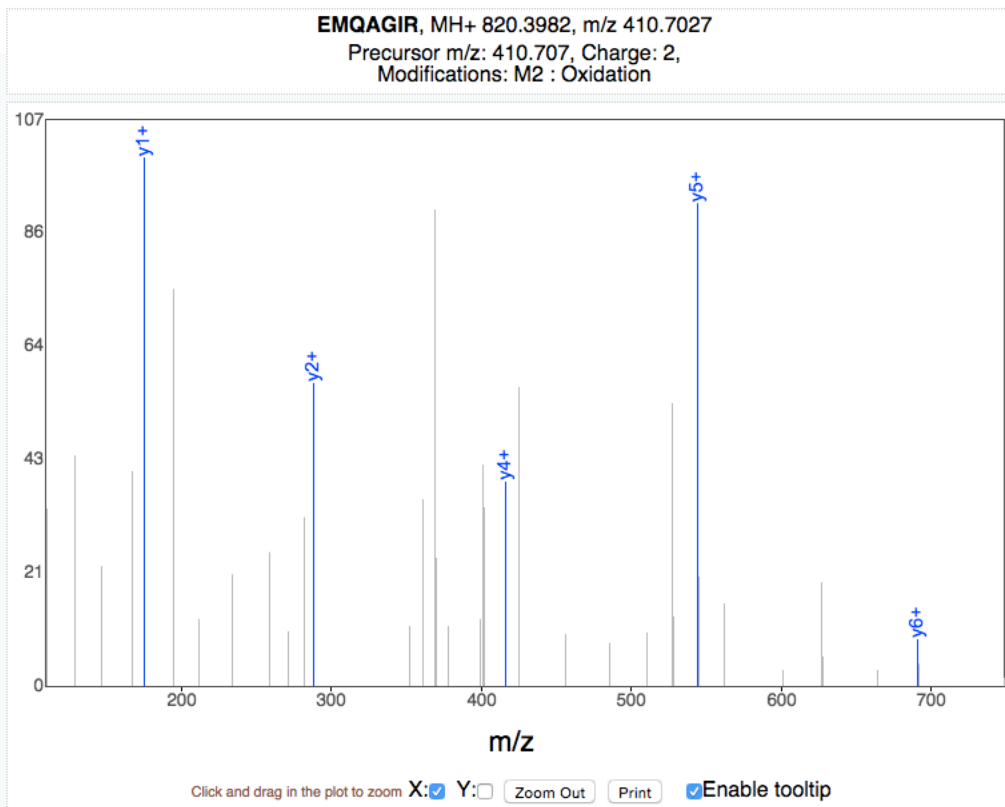

| b+       | Seq   | y+                       |
|----------|-------|--------------------------|
| 130.0499 | 1 E 7 |                          |
| 277.0853 | 2 M 6 | <a href="#">691.3556</a> |
| 405.1438 | 3 Q 5 | <a href="#">544.3202</a> |
| 476.1810 | 4 A 4 | <a href="#">416.2616</a> |
| 533.2024 | 5 G 3 | <a href="#">345.2245</a> |
| 646.2865 | 6 I 2 | <a href="#">288.2030</a> |
|          | 7 R 1 | <a href="#">175.1190</a> |

## SRM transitions

| Transition ID  | Precursor m/z | Precursor charge | Fragment m/z | Relative intensity |
|----------------|---------------|------------------|--------------|--------------------|
| EmQAGIR.2.y1.1 | 410.703       | 2                | 175.119      | 100                |
| EmQAGIR.2.y5.1 | 410.703       | 2                | 544.32       | 91                 |
| EmQAGIR.2.y2.1 | 410.703       | 2                | 288.203      | 57                 |
| EmQAGIR.2.y4.1 | 410.703       | 2                | 416.262      | 38                 |
| EmQAGIR.2.b7.2 | 410.703       | 2                | 401.697      | 33                 |
| EmQAGIR.2.y6.1 | 410.703       | 2                | 691.356      | 8                  |

### MS/MS spectrum

#### Ions:

a  1+  2+  3+

b  1+  2+  3+

c  1+  2+  3+

x  1+  2+  3+

y  1+  2+  3+

z  1+  2+  3+

[\[Deselect All\]](#)

#### Neutral Loss:

H<sub>2</sub>O (o)

NH<sub>3</sub> (\*)

Mass Type:

Mono  Avg

Mass Tolerance:  Da

Peak Assignment:

Most Intense

Nearest Match

Peak Labels:

Ion  m/z

None

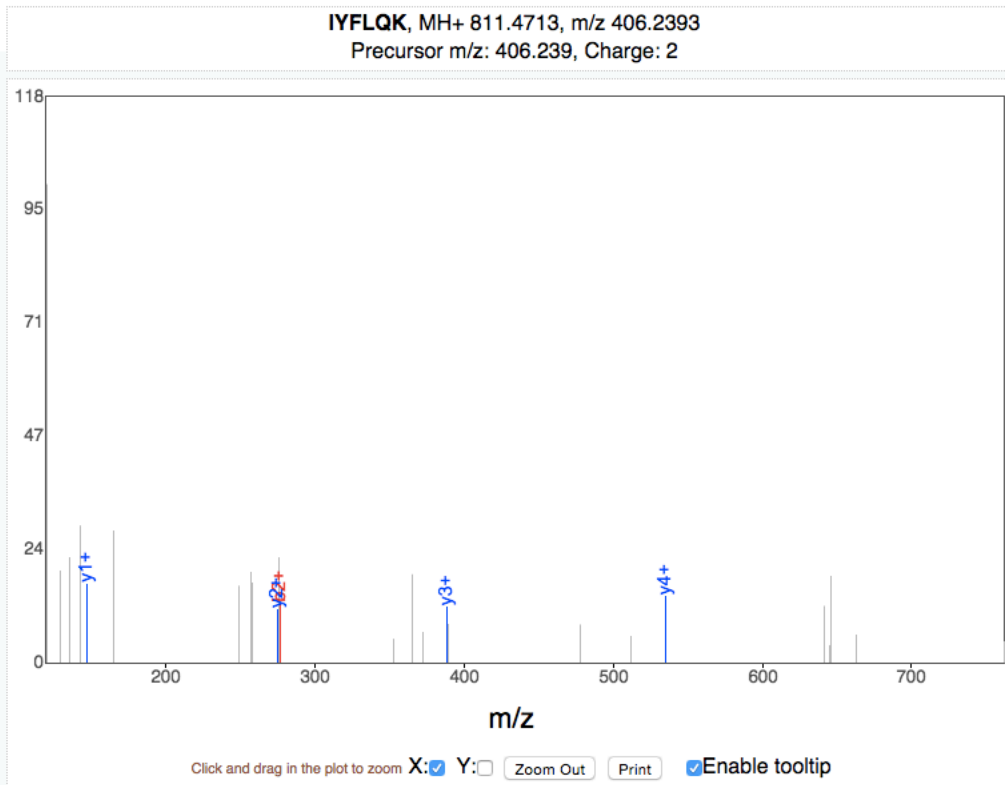

| b+              | Seq | y+                           |
|-----------------|-----|------------------------------|
| 114.0913        | 1   | I 6                          |
| <b>277.1547</b> | 2   | Y 5 698.3872                 |
| 424.2231        | 3   | F 4 <a href="#">535.3239</a> |
| 537.3071        | 4   | L 3 <a href="#">388.2554</a> |
| 665.3657        | 5   | Q 2 <a href="#">275.1714</a> |
| 6               | K 1 | <a href="#">147.1128</a>     |

### SRM transitions

| Transition ID | Precursor m/z | Precursor charge | Fragment m/z | Relative intensity |
|---------------|---------------|------------------|--------------|--------------------|
|---------------|---------------|------------------|--------------|--------------------|

## MS/MS spectrum

### Ions:

a  1+  2+  3+

b  1+  2+  3+

c  1+  2+  3+

x  1+  2+  3+

y  1+  2+  3+

z  1+  2+  3+

[\[Deselect All\]](#)

### Neutral Loss:

H<sub>2</sub>O (o)

NH<sub>3</sub> (\*)

### Mass Type:

Mono  Avg

Mass Tolerance:  Da

### Peak Assignment:

Most Intense

Nearest Match

### Peak Labels:

Ion  m/z

None

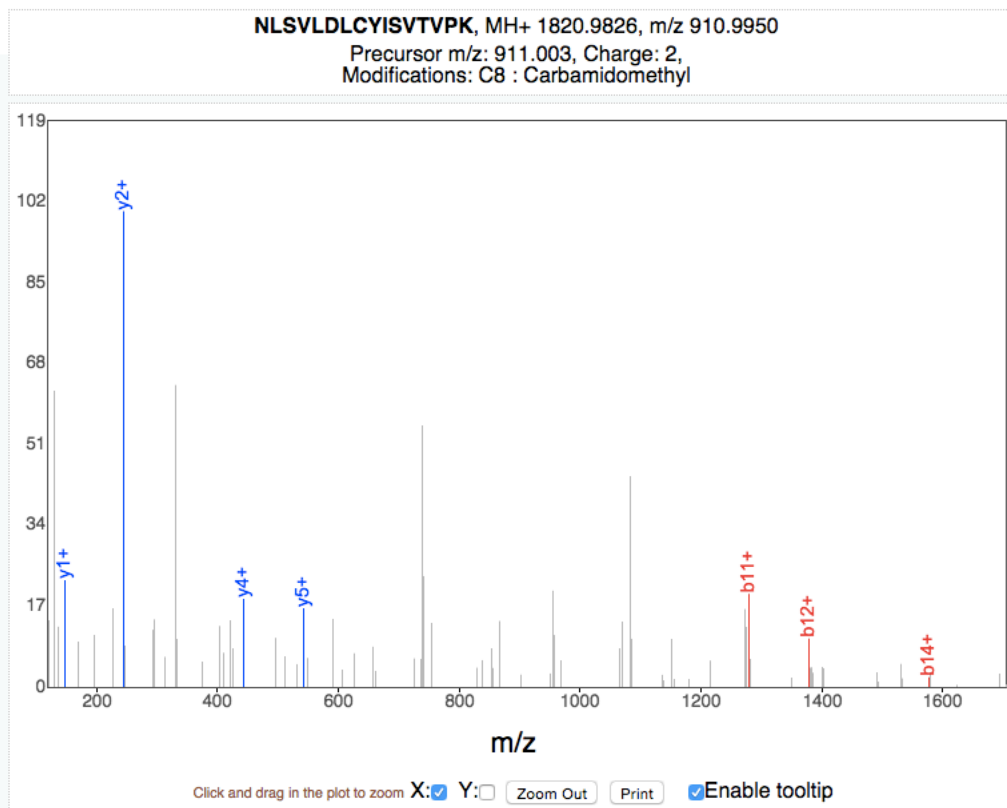

| b+        | Seq              | y+ |
|-----------|------------------|----|
| 115.0502  | 1 N 16           |    |
| 228.1343  | 2 L 15 1706.9397 |    |
| 315.1663  | 3 S 14 1593.8557 |    |
| 414.2347  | 4 V 13 1506.8236 |    |
| 527.3188  | 5 L 12 1407.7552 |    |
| 642.3457  | 6 D 11 1294.6712 |    |
| 755.4298  | 7 L 10 1179.6442 |    |
| 915.4604  | 8 C 9 1066.5601  |    |
| 1078.5238 | 9 Y 8 906.5295   |    |
| 1191.6078 | 10 I 7 743.4662  |    |
| 1278.6399 | 11 S 6 630.3821  |    |
| 1377.7083 | 12 V 5 543.3501  |    |
| 1478.7559 | 13 T 4 444.2817  |    |
| 1577.8244 | 14 V 3 343.2340  |    |
| 1674.8771 | 15 P 2 244.1656  |    |
|           | 16 K 1 147.1128  |    |

## SRM transitions

| Transition ID           | Precursor m/z | Precursor charge | Fragment m/z | Relative intensity |
|-------------------------|---------------|------------------|--------------|--------------------|
| NLSVLDLcYISVTPK.2.y2.1  | 910.995       | 2                | 244.166      | 100                |
| NLSVLDLcYISVTPK.2.y1.1  | 910.995       | 2                | 147.113      | 22                 |
| NLSVLDLcYISVTPK.2.b11.1 | 910.995       | 2                | 1278.64      | 19                 |
| NLSVLDLcYISVTPK.2.y4.1  | 910.995       | 2                | 444.282      | 18                 |
| NLSVLDLcYISVTPK.2.y5.1  | 910.995       | 2                | 543.35       | 16                 |
| NLSVLDLcYISVTPK.2.y10.2 | 910.995       | 2                | 590.326      | 14                 |
| NLSVLDLcYISVTPK.2.b12.1 | 910.995       | 2                | 1377.71      | 10                 |

MS/MS spectrum

Ions:

- a  1+  2+  3+
- b  1+  2+  3+
- c  1+  2+  3+
- x  1+  2+  3+
- y  1+  2+  3+
- z  1+  2+  3+

[Deselect All](#)

Neutral Loss:

- H<sub>2</sub>O (o)
- NH<sub>3</sub> (\*)

Mass Type:

- Mono  Avg

Mass Tolerance: 0.05 Da

[Update](#)

Peak Assignment:

- Most Intense
- Nearest Match

Peak Labels:

- Ion  m/z
- None

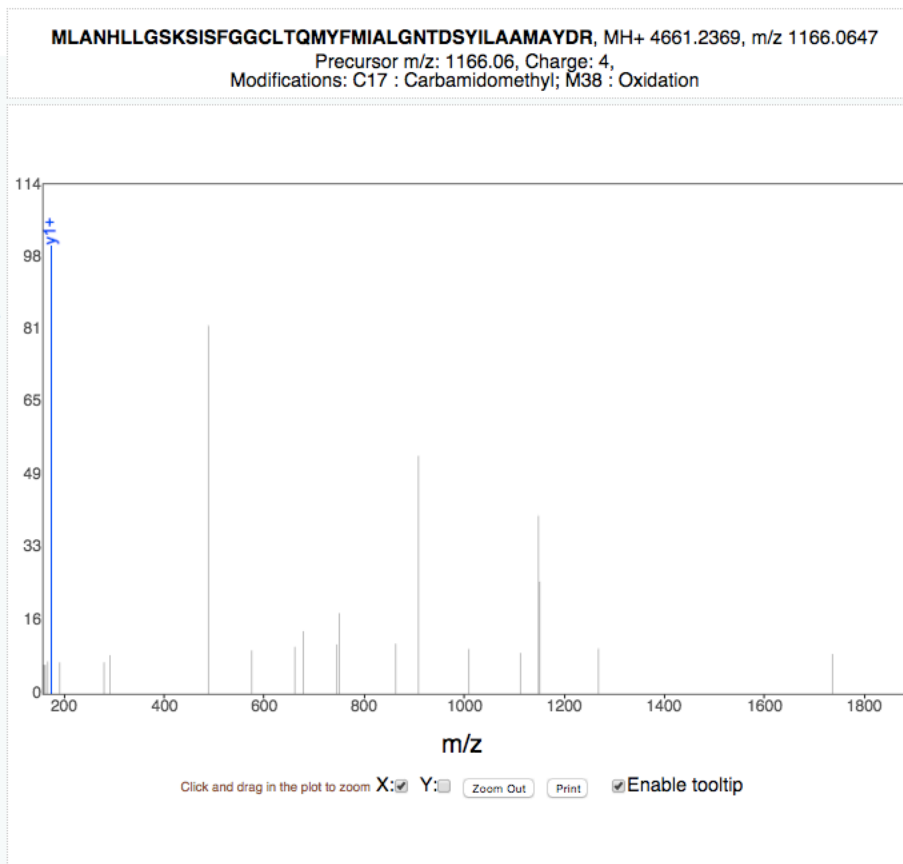

### MS/MS spectrum

- Ions:**
- a  1+  2+  3+
  - b  1+  2+  3+
  - c  1+  2+  3+
  - x  1+  2+  3+
  - y  1+  2+  3+
  - z  1+  2+  3+

**Neutral Loss:**

- H<sub>2</sub>O (o)
- NH<sub>3</sub> (\*)

**Mass Type:**

- Mono  Avg

Mass Tolerance: 0.05 Da

**Peak Assignment:**

- Most Intense
  - Nearest Match
- Peak Labels:**
- Ion m/z
  - None

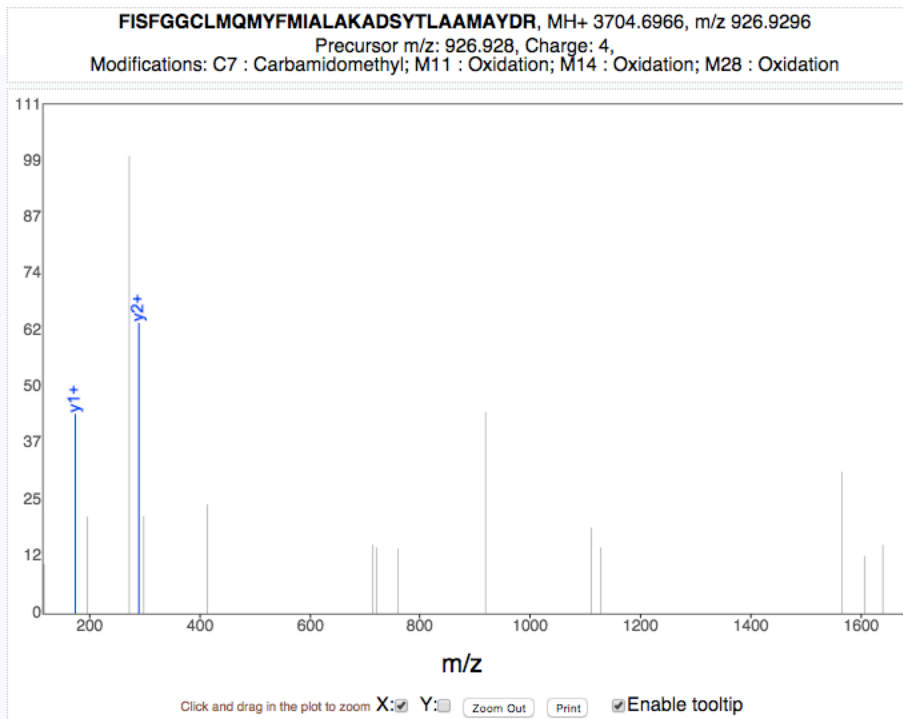

| b+        | b2+       | b3+       | Seq     | y+              | y2+       | y3+       |
|-----------|-----------|-----------|---------|-----------------|-----------|-----------|
| 148.0757  | 74.5415   | 50.0301   | 1 F 32  |                 |           |           |
| 261.1598  | 131.0835  | 87.7248   | 2 I 31  | 3557.6282       | 1779.3177 | 1186.5476 |
| 348.1918  | 174.5995  | 116.7354  | 3 S 30  | 3444.5441       | 1722.7757 | 1148.8529 |
| 495.2602  | 248.1337  | 165.7582  | 4 F 29  | 3357.5121       | 1679.2597 | 1119.8422 |
| 552.2817  | 276.6445  | 184.7654  | 5 G 28  | 3210.4437       | 1605.7255 | 1070.8194 |
| 609.3031  | 305.1552  | 203.7726  | 6 G 27  | 3153.4222       | 1577.2147 | 1051.8123 |
| 769.3338  | 385.1705  | 257.1161  | 7 C 26  | 3096.4008       | 1548.7040 | 1032.8051 |
| 882.4178  | 441.7126  | 294.8108  | 8 L 25  | 2936.3701       | 1468.6887 | 979.4616  |
| 1013.4583 | 507.2328  | 338.4910  | 9 M 24  | 2823.2860       | 1412.1467 | 941.7669  |
| 1141.5169 | 571.2621  | 381.1772  | 10 Q 23 | 2692.2456       | 1346.6264 | 898.0867  |
| 1288.5523 | 644.7798  | 430.1890  | 11 M 22 | 2564.1870       | 1282.5971 | 855.4005  |
| 1451.6156 | 726.3115  | 484.5434  | 12 Y 21 | 2417.1516       | 1209.0794 | 806.3887  |
| 1598.6840 | 799.8457  | 533.5662  | 13 F 20 | 2254.0883       | 1127.5478 | 752.0343  |
| 1745.7194 | 873.3634  | 582.5780  | 14 M 19 | 2107.0198       | 1054.0136 | 703.0115  |
| 1858.8035 | 929.9054  | 620.2727  | 15 I 18 | 1959.9844       | 980.4959  | 653.9997  |
| 1929.8406 | 965.4239  | 643.9517  | 16 A 17 | 1846.9004       | 923.9538  | 616.3050  |
| 2042.9247 | 1021.9660 | 681.6464  | 17 L 16 | 1775.8633       | 888.4353  | 592.6259  |
| 2113.9618 | 1057.4845 | 705.3254  | 18 A 15 | 1662.7792       | 831.8932  | 554.9312  |
| 2242.0568 | 1121.5320 | 748.0238  | 19 K 14 | 1591.7421       | 796.3747  | 531.2522  |
| 2313.0939 | 1157.0506 | 771.7028  | 20 A 13 | 1463.6471       | 732.3272  | 488.5539  |
| 2428.1208 | 1214.5640 | 810.0451  | 21 D 12 | 1392.6100       | 696.8086  | 464.8749  |
| 2515.1528 | 1258.0801 | 839.0558  | 22 S 11 | 1277.5831       | 639.2952  | 426.5325  |
| 2678.2162 | 1339.6117 | 893.4102  | 23 Y 10 | 1190.5510       | 595.7792  | 397.5219  |
| 2779.2639 | 1390.1356 | 927.0928  | 24 T 9  | 1027.4877       | 514.2475  | 343.1674  |
| 2892.3479 | 1446.6776 | 964.7875  | 25 L 8  | 926.4400        | 463.7237  | 309.4849  |
| 2963.3850 | 1482.1962 | 988.4665  | 26 A 7  | 813.3560        | 407.1816  | 271.7902  |
| 3034.4221 | 1517.7147 | 1012.1456 | 27 A 6  | 742.3189        | 371.6631  | 248.1111  |
| 3181.4575 | 1591.2324 | 1061.1574 | 28 M 5  | 671.2817        | 336.1445  | 224.4321  |
| 3252.4947 | 1626.7510 | 1084.8364 | 29 A 4  | 524.2463        | 262.6268  | 175.4203  |
| 3415.5580 | 1708.2826 | 1139.1908 | 30 Y 3  | 453.2092        | 227.1082  | 151.7413  |
| 3530.5849 | 1765.7961 | 1177.5332 | 31 D 2  | <b>290.1459</b> | 145.5766  | 97.3868   |
|           |           |           | 32 R 1  | 175.1190        | 88.0631   | 59.0445   |

### SRM transitions

| Transition ID                           | Precursor m/z | Precursor charge | Fragment m/z | Relative intensity |
|-----------------------------------------|---------------|------------------|--------------|--------------------|
| FISFGGcLMQmYFmIALAKADSYTLAAmAYDR.4.y2.1 | 926.93        | 4                | 290.146      | 100                |
| FISFGGcLMQmYFmIALAKADSYTLAAmAYDR.4.y1.1 | 926.93        | 4                | 175.119      | 68                 |

### MS/MS spectrum

#### Ions:

- a 1<sup>+</sup> 2<sup>+</sup> 3<sup>+</sup>  
 b 1<sup>+</sup> 2<sup>+</sup> 3<sup>+</sup>  
 c 1<sup>+</sup> 2<sup>+</sup> 3<sup>+</sup>  
 x 1<sup>+</sup> 2<sup>+</sup> 3<sup>+</sup>  
 y 1<sup>+</sup> 2<sup>+</sup> 3<sup>+</sup>  
 z 1<sup>+</sup> 2<sup>+</sup> 3<sup>+</sup>

[\[Deselect All\]](#)

#### Neutral Loss:

- H<sub>2</sub>O (o)  
 NH<sub>3</sub> (\*)

#### Mass Type:

- Mono  Avg

Mass Tolerance: 0.05 Da

[Update](#)

#### Peak Assignment:

- Most Intense  
 Nearest Match

#### Peak Labels:

- Ion  m/z  
 None

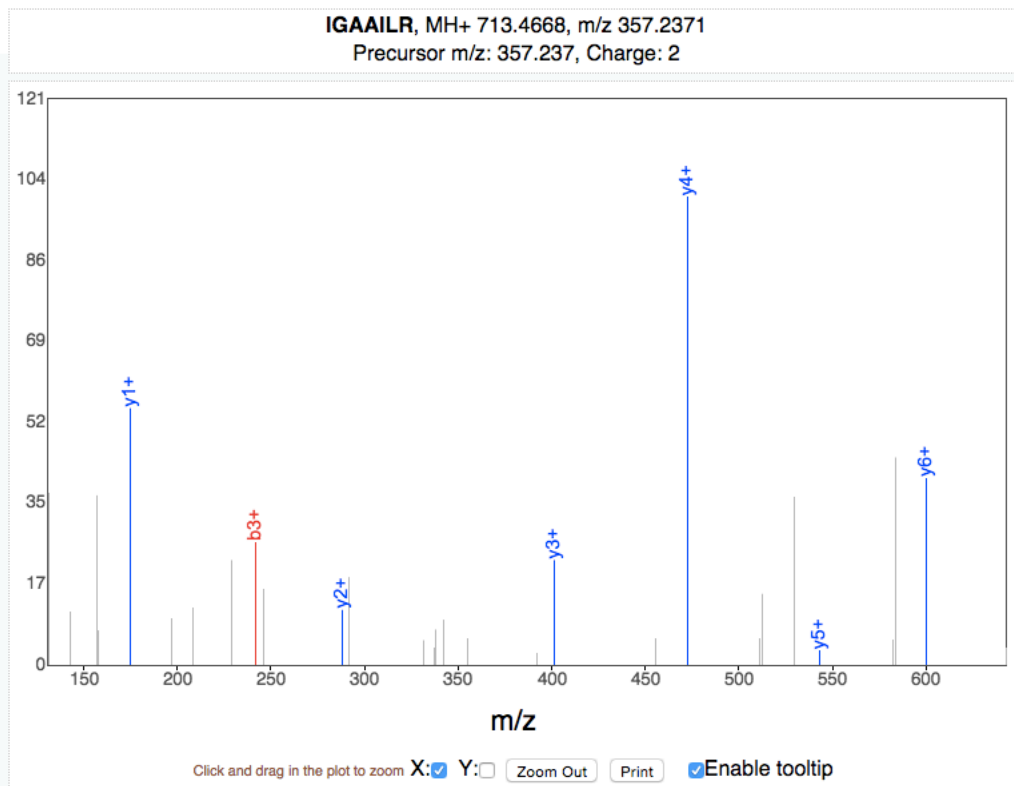

|                 | b+ | Seq | y+ |
|-----------------|----|-----|----|
| 114.0913        | 1  | I   | 7  |
| 171.1128        | 2  | G   | 6  |
| <b>242.1499</b> | 3  | A   | 5  |
| 313.1870        | 4  | A   | 4  |
| 426.2711        | 5  | I   | 3  |
| 539.3552        | 6  | L   | 2  |
|                 | 7  | R   | 1  |

### SRM transitions

| Transition ID | Precursor m/z | Precursor charge | Fragment m/z | Relative intensity |
|---------------|---------------|------------------|--------------|--------------------|
| IGAILR.2.y4.1 | 378.242       | 2                | 472.324      | 100                |
| IGAILR.2.y1.1 | 378.242       | 2                | 175.119      | 54                 |
| IGAILR.2.y6.1 | 378.242       | 2                | 600.383      | 39                 |
| IGAILR.2.y3.1 | 378.242       | 2                | 401.287      | 22                 |
| IGAILR.2.y2.1 | 378.242       | 2                | 288.203      | 11                 |
| IGAILR.2.b4.1 | 378.242       | 2                | 355.198      | 5                  |
| IGAILR.2.y5.1 | 378.242       | 2                | 543.361      | 2                  |

## MS/MS spectrum

### Ions:

a  1+  2+  3+

b  1+  2+  3+

c  1+  2+  3+

x  1+  2+  3+

y  1+  2+  3+

z  1+  2+  3+

[Deselect All](#)

### Neutral Loss:

H<sub>2</sub>O (o)

NH<sub>3</sub> (\*)

### Mass Type:

Mono  Avg

Mass Tolerance:  Da

### Peak Assignment:

Most Intense

Nearest Match

### Peak Labels:

Ion  m/z

None

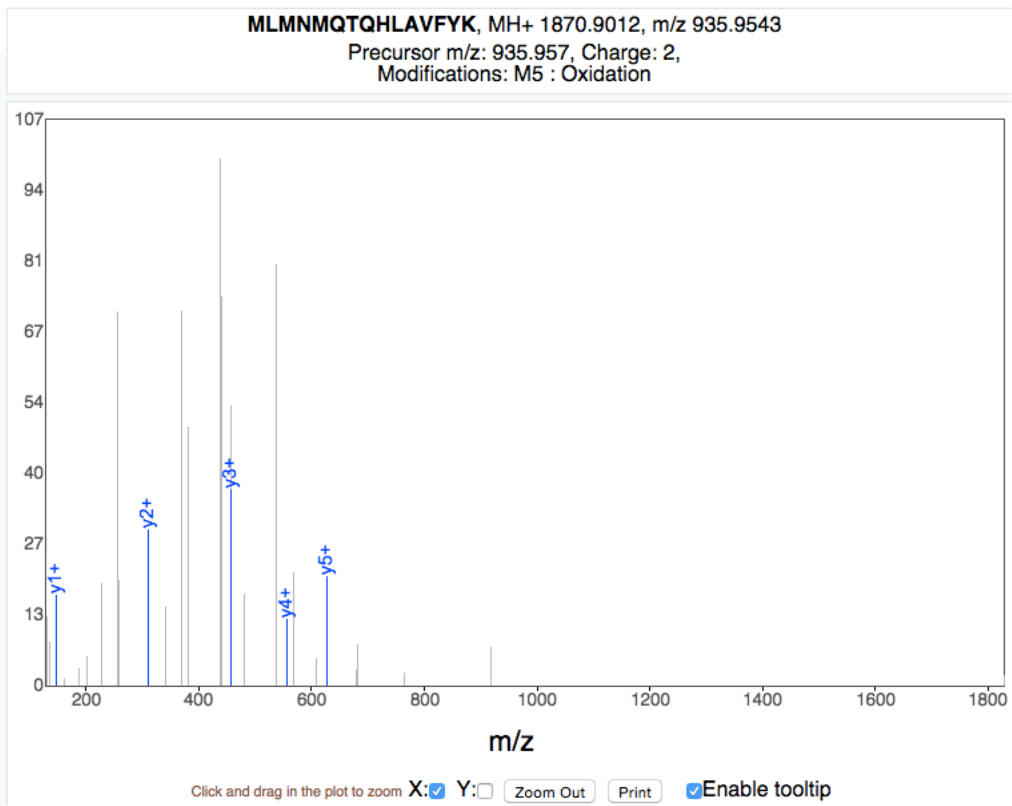

| b+        | Seq                    | y+ |
|-----------|------------------------|----|
| 132.0478  | 1 M 15                 |    |
| 245.1318  | 2 L 14 1739.8608       |    |
| 376.1723  | 3 M 13 1626.7767       |    |
| 490.2152  | 4 N 12 1495.7362       |    |
| 637.2506  | 5 M 11 1381.6933       |    |
| 765.3092  | 6 Q 10 1234.6579       |    |
| 866.3569  | 7 T 9 1106.5993        |    |
| 994.4155  | 8 Q 8 1005.5516        |    |
| 1131.4744 | 9 H 7 877.4930         |    |
| 1244.5584 | 10 L 6 740.4341        |    |
| 1315.5956 | 11 A 5 <b>627.3501</b> |    |
| 1414.6640 | 12 V 4 <b>556.3130</b> |    |
| 1561.7324 | 13 F 3 <b>457.2445</b> |    |
| 1724.7957 | 14 Y 2 <b>310.1761</b> |    |
|           | 15 K 1 <b>147.1128</b> |    |

## SRM transitions

| Transition ID          | Precursor m/z | Precursor charge | Fragment m/z | Relative intensity |
|------------------------|---------------|------------------|--------------|--------------------|
| MLMNMQTQHLAVFYK.2.y7.2 | 935.954       | 2                | 439.25       | 100                |
| MLMNMQTQHLAVFYK.2.y3.1 | 935.954       | 2                | 457.245      | 50                 |
| MLMNMQTQHLAVFYK.2.y2.1 | 935.954       | 2                | 310.176      | 40                 |
| MLMNMQTQHLAVFYK.2.y5.1 | 935.954       | 2                | 627.35       | 28                 |
| MLMNMQTQHLAVFYK.2.y1.1 | 935.954       | 2                | 147.113      | 23                 |
| MLMNMQTQHLAVFYK.2.y4.1 | 935.954       | 2                | 556.313      | 16                 |

### MS/MS spectrum

#### Ions:

- a  1+  2+  3+
- b  1+  2+  3+
- c  1+  2+  3+
- x  1+  2+  3+
- y  1+  2+  3+
- z  1+  2+  3+

[Deselect All](#)

#### Neutral Loss:

- H<sub>2</sub>O (o)
- NH<sub>3</sub> (\*)

#### Mass Type:

- Mono  Avg

Mass Tolerance: 0.05 Da

[Update](#)

#### Peak Assignment:

- Most Intense
- Nearest Match

#### Peak Labels:

- Ion m/z
- None

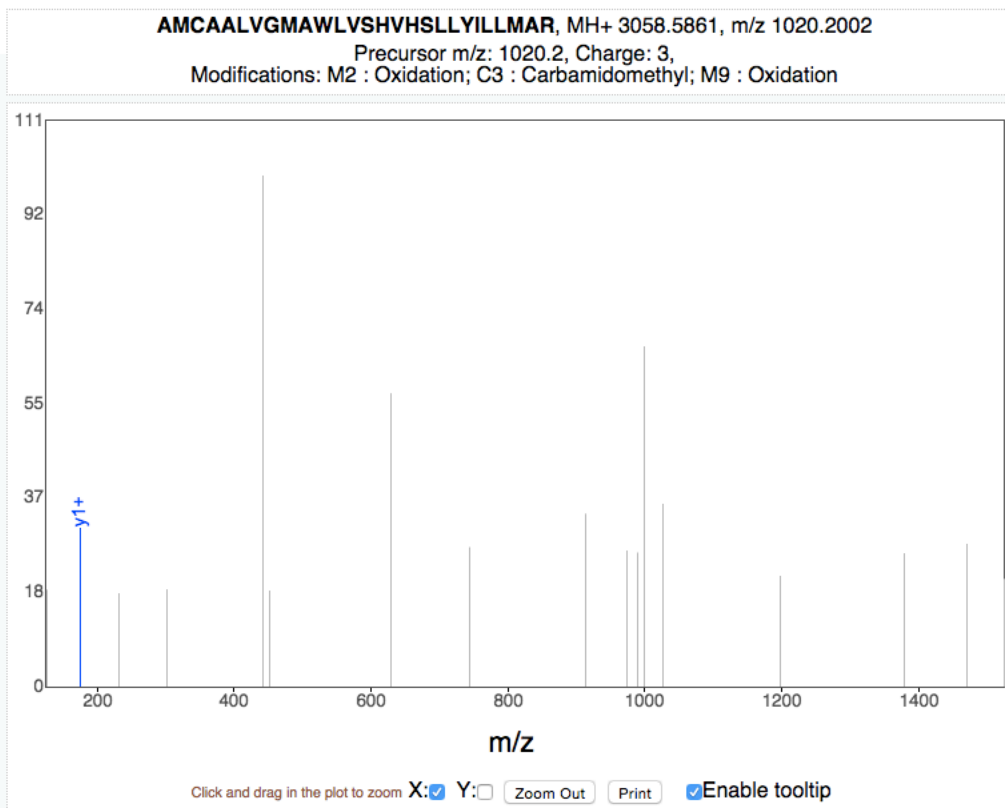

| b+        | b2+       | Seq     | y+              | y2+       |
|-----------|-----------|---------|-----------------|-----------|
| 72.0444   | 36.5258   | 1 A 27  |                 |           |
| 219.0798  | 110.0435  | 2 M 26  | 2987.5490       | 1494.2781 |
| 379.1104  | 190.0589  | 3 C 25  | 2840.5136       | 1420.7604 |
| 450.1476  | 225.5774  | 4 A 24  | 2680.4830       | 1340.7451 |
| 521.1847  | 261.0960  | 5 A 23  | 2609.4459       | 1305.2266 |
| 634.2687  | 317.6380  | 6 L 22  | 2538.4087       | 1269.7080 |
| 733.3371  | 367.1722  | 7 V 21  | 2425.3247       | 1213.1660 |
| 790.3586  | 395.6829  | 8 G 20  | 2326.2563       | 1163.6318 |
| 937.3940  | 469.2006  | 9 M 19  | 2269.2348       | 1135.1210 |
| 1008.4311 | 504.7192  | 10 A 18 | 2122.1994       | 1061.6033 |
| 1194.5104 | 597.7589  | 11 W 17 | 2051.1623       | 1026.0848 |
| 1307.5945 | 654.3009  | 12 L 16 | 1865.0830       | 933.0451  |
| 1406.6629 | 703.8351  | 13 V 15 | 1751.9989       | 876.5031  |
| 1493.6949 | 747.3511  | 14 S 14 | 1652.9305       | 826.9689  |
| 1630.7539 | 815.8806  | 15 H 13 | 1565.8985       | 783.4529  |
| 1729.8223 | 865.4148  | 16 V 12 | 1428.8396       | 714.9234  |
| 1866.8812 | 933.9442  | 17 H 11 | 1329.7711       | 665.3892  |
| 1953.9132 | 977.4602  | 18 S 10 | 1192.7122       | 596.8598  |
| 2066.9973 | 1034.0023 | 19 L 9  | 1105.6802       | 553.3437  |
| 2180.0813 | 1090.5443 | 20 L 8  | 992.5961        | 496.8017  |
| 2343.1447 | 1172.0760 | 21 Y 7  | 879.5121        | 440.2597  |
| 2456.2287 | 1228.6180 | 22 I 6  | 716.4487        | 358.7280  |
| 2569.3128 | 1285.1600 | 23 L 5  | 603.3647        | 302.1860  |
| 2682.3969 | 1341.7021 | 24 L 4  | 490.2806        | 245.6439  |
| 2813.4373 | 1407.2223 | 25 M 3  | 377.1966        | 189.1019  |
| 2884.4745 | 1442.7409 | 26 A 2  | 246.1561        | 123.5817  |
|           |           | 27 R 1  | <b>175.1190</b> | 88.0631   |

### SRM transitions

| Transition ID                     | Precursor m/z | Precursor charge | Fragment m/z | Relative intensity |
|-----------------------------------|---------------|------------------|--------------|--------------------|
| AmcAALVGMALVSHVHSLLYILLMAR.3.y1.1 | 1020.2        | 3                | 175.119      | 100                |



### MS/MS spectrum

#### Ions:

- 1<sup>+</sup>  2<sup>+</sup>  3<sup>+</sup>  
 1<sup>+</sup>  2<sup>+</sup>  3<sup>+</sup>

[\[Deselect All\]](#)

#### Neutral Loss:

- H<sub>2</sub>O (o)  
 NH<sub>3</sub> (\*)

#### Mass Type:

- Mono  Avg

Mass Tolerance:  Da

[Update](#)

#### Peak Assignment:

- Most Intense  
 Nearest Match

#### Peak Labels:

- Ion  m/z  
 None

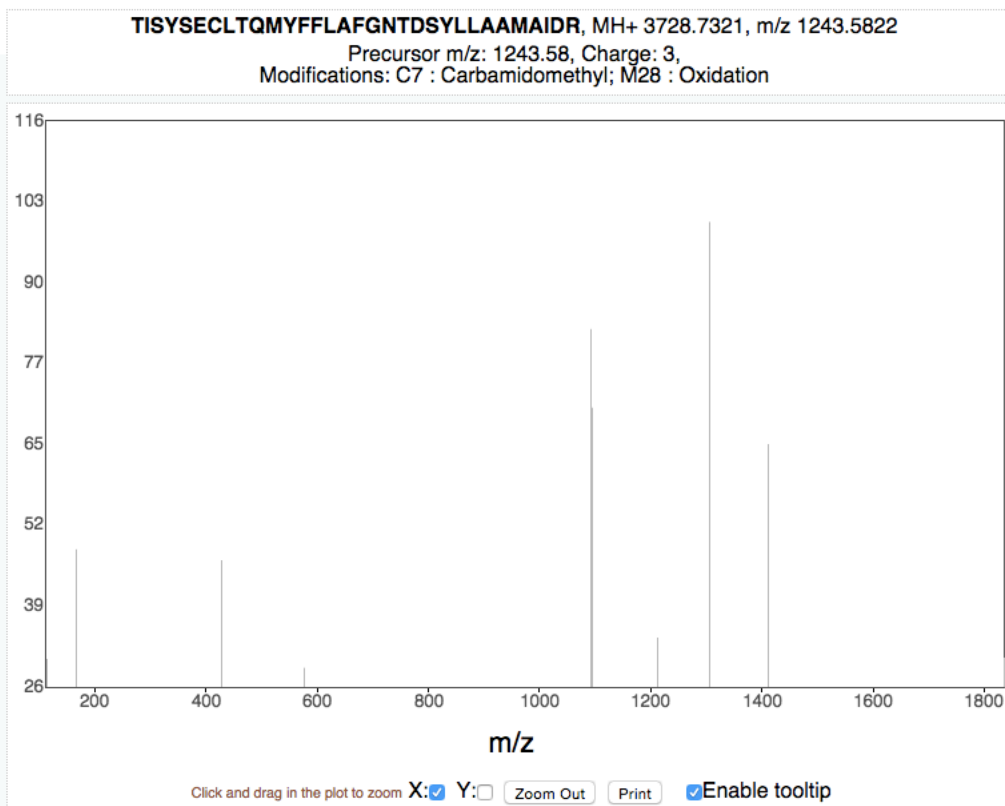

| b+        | b2+       | Seq     | y+        | y2+       |
|-----------|-----------|---------|-----------|-----------|
| 102.0550  | 51.5311   | 1 T 32  |           |           |
| 215.1390  | 108.0731  | 2 I 31  | 3627.6844 | 1814.3459 |
| 302.1710  | 151.5892  | 3 S 30  | 3514.6004 | 1757.8038 |
| 465.2344  | 233.1208  | 4 Y 29  | 3427.5683 | 1714.2878 |
| 552.2664  | 276.6368  | 5 S 28  | 3264.5050 | 1632.7561 |
| 681.3090  | 341.1581  | 6 E 27  | 3177.4730 | 1589.2401 |
| 841.3396  | 421.1735  | 7 C 26  | 3048.4304 | 1524.7188 |
| 954.4237  | 477.7155  | 8 L 25  | 2888.3998 | 1444.7035 |
| 1055.4714 | 528.2393  | 9 T 24  | 2775.3157 | 1388.1615 |
| 1183.5300 | 592.2686  | 10 Q 23 | 2674.2680 | 1337.6376 |
| 1314.5705 | 657.7889  | 11 M 22 | 2546.2094 | 1273.6084 |
| 1477.6338 | 739.3205  | 12 Y 21 | 2415.1689 | 1208.0881 |
| 1624.7022 | 812.8547  | 13 F 20 | 2252.1056 | 1126.5564 |
| 1771.7706 | 886.3889  | 14 F 19 | 2105.0372 | 1053.0222 |
| 1884.8547 | 942.9310  | 15 L 18 | 1957.9688 | 979.4880  |
| 1955.8918 | 978.4495  | 16 A 17 | 1844.8847 | 922.9460  |
| 2102.9602 | 1051.9837 | 17 F 16 | 1773.8476 | 887.4274  |
| 2159.9817 | 1080.4945 | 18 G 15 | 1626.7792 | 813.8932  |
| 2274.0246 | 1137.5159 | 19 N 14 | 1569.7577 | 785.3825  |
| 2375.0723 | 1188.0398 | 20 T 13 | 1455.7148 | 728.3610  |
| 2490.0992 | 1245.5532 | 21 D 12 | 1354.6671 | 677.8372  |
| 2577.1312 | 1289.0693 | 22 S 11 | 1239.6402 | 620.3237  |
| 2740.1946 | 1370.6009 | 23 Y 10 | 1152.6082 | 576.8077  |
| 2853.2786 | 1427.1430 | 24 L 9  | 989.5448  | 495.2761  |
| 2966.3627 | 1483.6850 | 25 L 8  | 876.4608  | 438.7340  |
| 3037.3998 | 1519.2035 | 26 A 7  | 763.3767  | 382.1920  |
| 3108.4369 | 1554.7221 | 27 A 6  | 692.3396  | 346.6734  |
| 3255.4723 | 1628.2398 | 28 M 5  | 621.3025  | 311.1549  |
| 3326.5094 | 1663.7584 | 29 A 4  | 474.2671  | 237.6372  |
| 3439.5935 | 1720.3004 | 30 I 3  | 403.2300  | 202.1186  |
| 3554.6204 | 1777.8139 | 31 D 2  | 290.1459  | 145.5766  |
|           |           | 32 R 1  | 175.1190  | 88.0631   |

### SRM transitions

| Transition ID | Precursor m/z | Precursor charge | Fragment m/z | Relative intensity |
|---------------|---------------|------------------|--------------|--------------------|
|---------------|---------------|------------------|--------------|--------------------|

## MS/MS spectrum

### Ions:

a  1+  2+  3+

b  1+  2+  3+

c  1+  2+  3+

x  1+  2+  3+

y  1+  2+  3+

z  1+  2+  3+

[\[Deselect All\]](#)

### Neutral Loss:

H<sub>2</sub>O (o)

NH<sub>3</sub> (\*)

### Mass Type:

Mono  Avg

Mass Tolerance:  Da

### Peak Assignment:

Most Intense

Nearest Match

### Peak Labels:

Ion  m/z

None

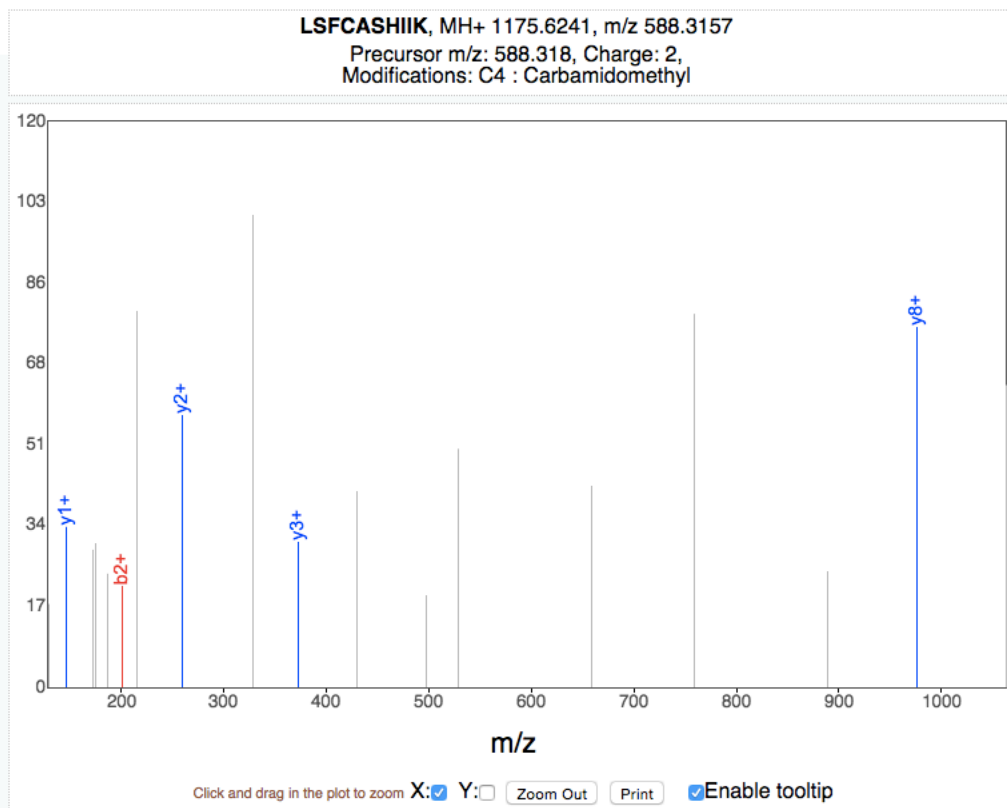

| b+              | Seq    | y+              |
|-----------------|--------|-----------------|
| 114.0913        | 1 L 10 |                 |
| <b>201.1234</b> | 2 S 9  | 1062.5401       |
| 348.1918        | 3 F 8  | <b>975.5080</b> |
| 508.2224        | 4 C 7  | 828.4396        |
| 579.2595        | 5 A 6  | 668.4090        |
| 666.2916        | 6 S 5  | 597.3719        |
| 803.3505        | 7 H 4  | 510.3398        |
| 916.4345        | 8 I 3  | <b>373.2809</b> |
| 1029.5186       | 9 I 2  | <b>260.1969</b> |
|                 | 10 K 1 | <b>147.1128</b> |

## SRM transitions

| Transition ID     | Precursor m/z | Precursor charge | Fragment m/z | Relative intensity |
|-------------------|---------------|------------------|--------------|--------------------|
| LSFcASHIIK.2.y8.1 | 588.316       | 2                | 975.508      | 100                |
| LSFcASHIIK.2.y9.1 | 588.316       | 2                | 1062.54      | 83                 |
| LSFcASHIIK.2.y2.1 | 588.316       | 2                | 260.197      | 75                 |
| LSFcASHIIK.2.y1.1 | 588.316       | 2                | 147.113      | 44                 |
| LSFcASHIIK.2.y3.1 | 588.316       | 2                | 373.281      | 40                 |
| LSFcASHIIK.2.y3.2 | 588.316       | 2                | 187.144      | 31                 |
| LSFcASHIIK.2.b2.1 | 588.316       | 2                | 201.123      | 27                 |

### MS/MS spectrum

**Ions:**

- a  1+  2+  3+
- b  1+  2+  3+
- c  1+  2+  3+
- x  1+  2+  3+
- y  1+  2+  3+
- z  1+  2+  3+

[\[Deselect All\]](#)

**Neutral Loss:**

- H<sub>2</sub>O (o)
- NH<sub>3</sub> (\*)

**Mass Type:**

- Mono  Avg

Mass Tolerance:  Da

**Peak Assignment:**

- Most Intense
- Nearest Match

**Peak Labels:**

- Ion  m/z
- None

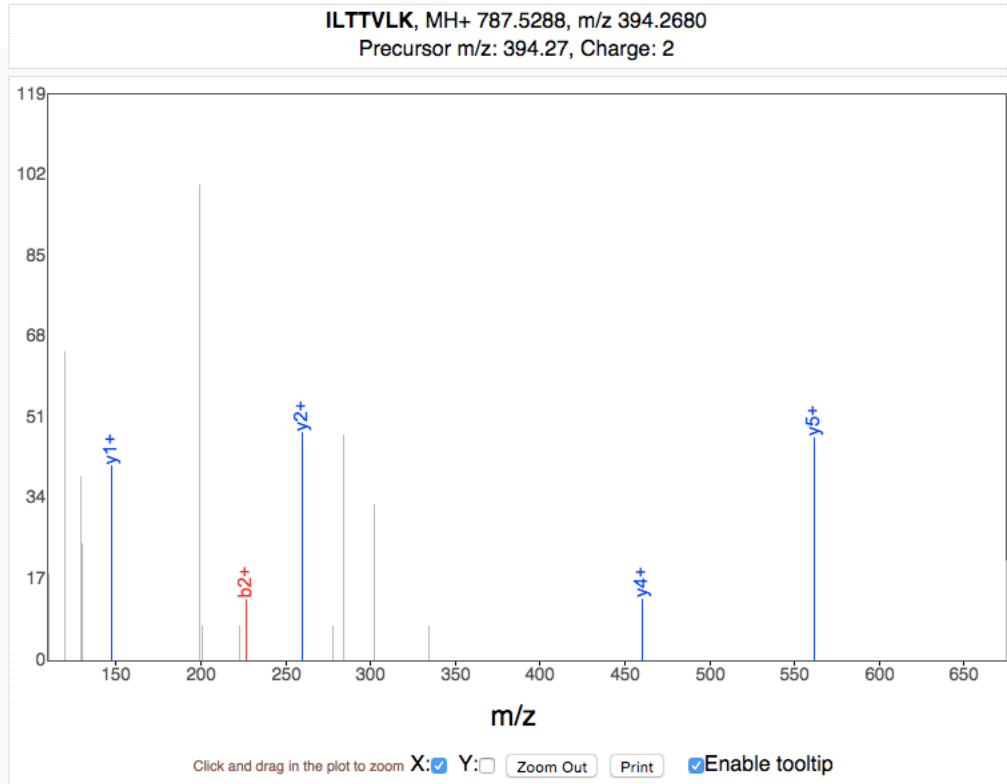

|                 | b+ | Seq | y+                |
|-----------------|----|-----|-------------------|
| 114.0913        | 1  | I   | 7                 |
| <b>227.1754</b> | 2  | L   | 6 674.4447        |
| 328.2231        | 3  | T   | 5 <b>561.3606</b> |
| 429.2708        | 4  | T   | 4 <b>460.3130</b> |
| 528.3392        | 5  | V   | 3 359.2653        |
| 641.4232        | 6  | L   | 2 <b>260.1969</b> |
|                 | 7  | K   | 1 <b>147.1128</b> |

### SRM transitions

| Transition ID  | Precursor m/z | Precursor charge | Fragment m/z | Relative intensity |
|----------------|---------------|------------------|--------------|--------------------|
| ILTTVLK.2.y2.1 | 415.273       | 2                | 260.197      | 100                |
| ILTTVLK.2.y5.1 | 415.273       | 2                | 561.361      | 97                 |
| ILTTVLK.2.y1.1 | 415.273       | 2                | 147.113      | 85                 |
| ILTTVLK.2.y6.1 | 415.273       | 2                | 674.445      | 43                 |
| ILTTVLK.2.y4.1 | 415.273       | 2                | 460.313      | 26                 |

## MS/MS spectrum

### Ions:

a  1+  2+  3+

b  1+  2+  3+

c  1+  2+  3+

x  1+  2+  3+

y  1+  2+  3+

z  1+  2+  3+

[\[Deselect All\]](#)

### Neutral Loss:

H<sub>2</sub>O (o)

NH<sub>3</sub> (\*)

Mass Type:

Mono  Avg

Mass Tolerance:  Da

Peak Assignment:

Most Intense

Nearest Match

Peak Labels:

Ion  m/z

None

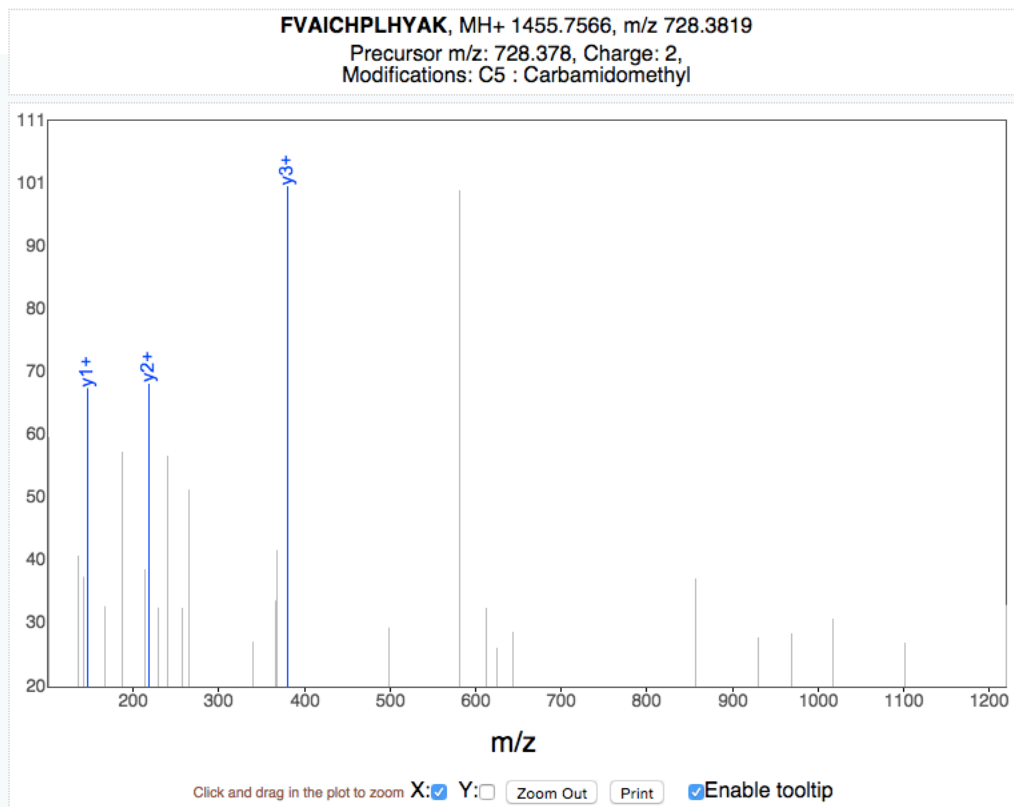

| b+        | Seq    | y+              |
|-----------|--------|-----------------|
| 148.0757  | 1 F 12 |                 |
| 247.1441  | 2 V 11 | 1308.6881       |
| 318.1812  | 3 A 10 | 1209.6197       |
| 431.2653  | 4 I 9  | 1138.5826       |
| 591.2959  | 5 C 8  | 1025.4985       |
| 728.3548  | 6 H 7  | 865.4679        |
| 825.4076  | 7 P 6  | 728.4090        |
| 938.4917  | 8 L 5  | 631.3562        |
| 1075.5506 | 9 H 4  | 518.2722        |
| 1238.6139 | 10 Y 3 | <b>381.2132</b> |
| 1309.6510 | 11 A 2 | <b>218.1499</b> |
|           | 12 K 1 | <b>147.1128</b> |

## SRM transitions

| Transition ID       | Precursor m/z | Precursor charge | Fragment m/z | Relative intensity |
|---------------------|---------------|------------------|--------------|--------------------|
| FVAICHPLHYAK.2.y3.1 | 728.382       | 2                | 381.213      | 100                |
| FVAICHPLHYAK.2.y2.1 | 728.382       | 2                | 218.15       | 68                 |
| FVAICHPLHYAK.2.y1.1 | 728.382       | 2                | 147.113      | 67                 |

### MS/MS spectrum

#### Ions:

- 1<sup>+</sup>  2<sup>+</sup>  3<sup>+</sup>  
 1<sup>+</sup>  2<sup>+</sup>  3<sup>+</sup>

[\[Deselect All\]](#)

#### Neutral Loss:

- H<sub>2</sub>O (o)  
 NH<sub>3</sub> (\*)

#### Mass Type:

- Mono  Avg

Mass Tolerance: 0.05 Da

[Update](#)

#### Peak Assignment:

- Most Intense  
 Nearest Match

#### Peak Labels:

- Ion  m/z  
 None

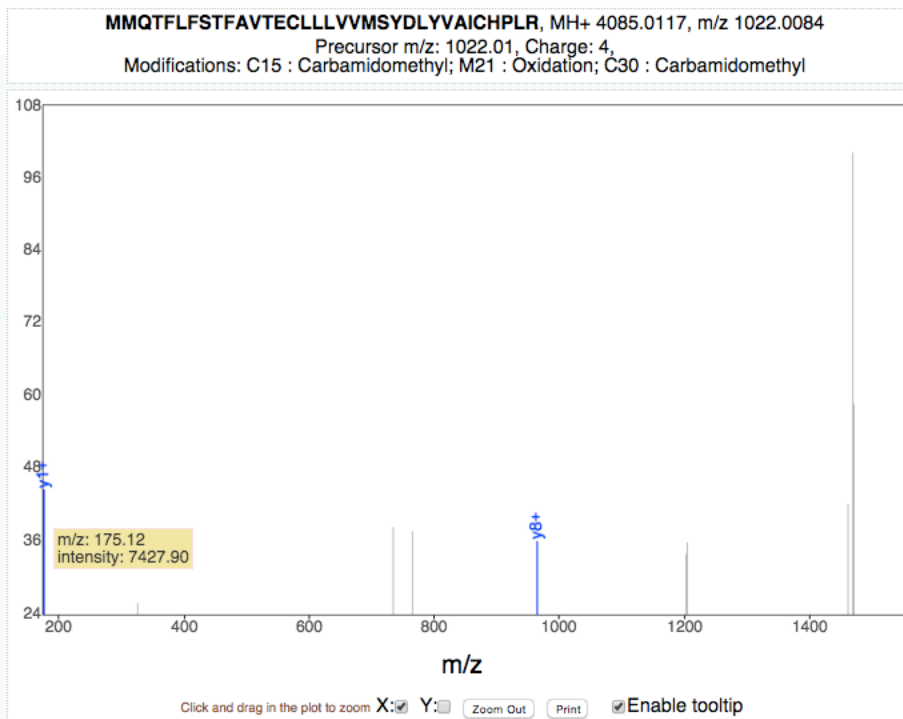

| b+        | b2+       | b3+       | Seq     | y+        | y2+       | y3+       |
|-----------|-----------|-----------|---------|-----------|-----------|-----------|
| 132.0478  | 66.5275   | 44.6874   | 1 M 34  |           |           |           |
| 263.0882  | 132.0478  | 88.3676   | 2 M 33  | 3953.9712 | 1977.4893 | 1318.6619 |
| 391.1468  | 196.0770  | 131.0538  | 3 Q 32  | 3822.9308 | 1911.9690 | 1274.9818 |
| 492.1945  | 246.6009  | 164.7364  | 4 T 31  | 3694.8722 | 1847.9397 | 1232.2956 |
| 639.2629  | 320.1351  | 213.7592  | 5 F 30  | 3593.8245 | 1797.4159 | 1198.6130 |
| 752.3470  | 376.6771  | 251.4538  | 6 L 29  | 3446.7561 | 1723.8817 | 1149.5902 |
| 899.4154  | 450.2113  | 300.4766  | 7 F 28  | 3333.6720 | 1667.3397 | 1111.8955 |
| 986.4474  | 493.7273  | 329.4873  | 8 S 27  | 3186.6036 | 1593.8054 | 1062.8727 |
| 1087.4951 | 544.2512  | 363.1699  | 9 T 26  | 3099.5716 | 1550.2894 | 1033.8620 |
| 1234.5635 | 617.7854  | 412.1927  | 10 F 25 | 2998.5239 | 1499.7656 | 1000.1795 |
| 1305.6006 | 653.3040  | 435.8717  | 11 A 24 | 2851.4555 | 1426.2314 | 951.1567  |
| 1404.6690 | 702.8382  | 468.8945  | 12 V 23 | 2780.4184 | 1390.7128 | 927.4776  |
| 1505.7167 | 753.3620  | 502.5771  | 13 T 22 | 2681.3500 | 1341.1786 | 894.4548  |
| 1634.7593 | 817.8833  | 545.5913  | 14 E 21 | 2580.3023 | 1290.6548 | 860.7723  |
| 1794.7900 | 897.8986  | 598.9348  | 15 C 20 | 2451.2597 | 1226.1335 | 817.7581  |
| 1907.8740 | 954.4407  | 636.6295  | 16 L 19 | 2291.2290 | 1146.1182 | 764.4145  |
| 2020.9581 | 1010.9827 | 674.3242  | 17 L 18 | 2178.1450 | 1089.5761 | 726.7198  |
| 2134.0422 | 1067.5247 | 712.0189  | 18 L 17 | 2065.0609 | 1033.0341 | 689.0252  |
| 2233.1106 | 1117.0589 | 745.0417  | 19 V 16 | 1951.9769 | 976.4921  | 651.3305  |
| 2332.1790 | 1166.5931 | 778.0645  | 20 V 15 | 1852.9084 | 926.9579  | 618.3077  |
| 2479.2144 | 1240.1108 | 827.0763  | 21 M 14 | 1753.8400 | 877.4237  | 585.2849  |
| 2566.2464 | 1283.6268 | 856.0870  | 22 S 13 | 1606.8046 | 803.9060  | 536.2731  |
| 2729.3097 | 1365.1585 | 910.4414  | 23 Y 12 | 1519.7726 | 760.3899  | 507.2624  |
| 2844.3367 | 1422.6720 | 948.7837  | 24 D 11 | 1356.7093 | 678.8583  | 452.9079  |
| 2957.4207 | 1479.2140 | 986.4784  | 25 L 10 | 1241.6823 | 621.3448  | 414.5656  |
| 3120.4841 | 1560.7457 | 1040.8329 | 26 Y 9  | 1128.5983 | 564.8028  | 376.8709  |
| 3219.5525 | 1610.2799 | 1073.8557 | 27 V 8  | 965.5349  | 483.2711  | 322.5165  |
| 3290.5896 | 1645.7984 | 1097.5347 | 28 A 7  | 866.4665  | 433.7369  | 289.4937  |
| 3403.6737 | 1702.3405 | 1135.2294 | 29 I 6  | 795.4294  | 398.2183  | 265.8147  |
| 3563.7043 | 1782.3558 | 1188.5730 | 30 C 5  | 682.3453  | 341.6763  | 228.1200  |
| 3700.7632 | 1850.8853 | 1234.2593 | 31 H 4  | 522.3147  | 261.6610  | 174.7764  |
| 3797.8160 | 1899.4116 | 1266.6102 | 32 P 3  | 385.2558  | 193.1315  | 129.0901  |
| 3910.9001 | 1955.9537 | 1304.3049 | 33 L 2  | 288.2030  | 144.6051  | 96.7392   |
|           |           |           | 34 R 1  | 175.1190  | 88.0631   | 59.0445   |

### SRM transitions

| Transition ID                            | Precursor m/z | Precursor charge | Fragment m/z | Relative intensity |
|------------------------------------------|---------------|------------------|--------------|--------------------|
| MMQTFLFSTFAVTEcLLLVmSYDLYVAIcHPLR.4.y1.1 | 1022.01       | 4                | 175.119      | 100                |
| MMQTFLFSTFAVTEcLLLVmSYDLYVAIcHPLR.4.y8.1 | 1022.01       | 4                | 965.535      | 80                 |

MS/MS spectrum

- Ions:  
**a**  1+  2+  3+  
**b**  1+  2+  3+  
**c**  1+  2+  3+  
**x**  1+  2+  3+  
**y**  1+  2+  3+  
**z**  1+  2+  3+  
[Deselect All](#)

Neutral Loss:

- H<sub>2</sub>O (o)  
 NH<sub>3</sub> (\*)

Mass Type:

- Mono  Avg

Mass Tolerance: 0.05 Da

[Update](#)

Peak Assignment:

- Most Intense  
 Nearest Match

Peak Labels:

- Ion  m/z  
 None

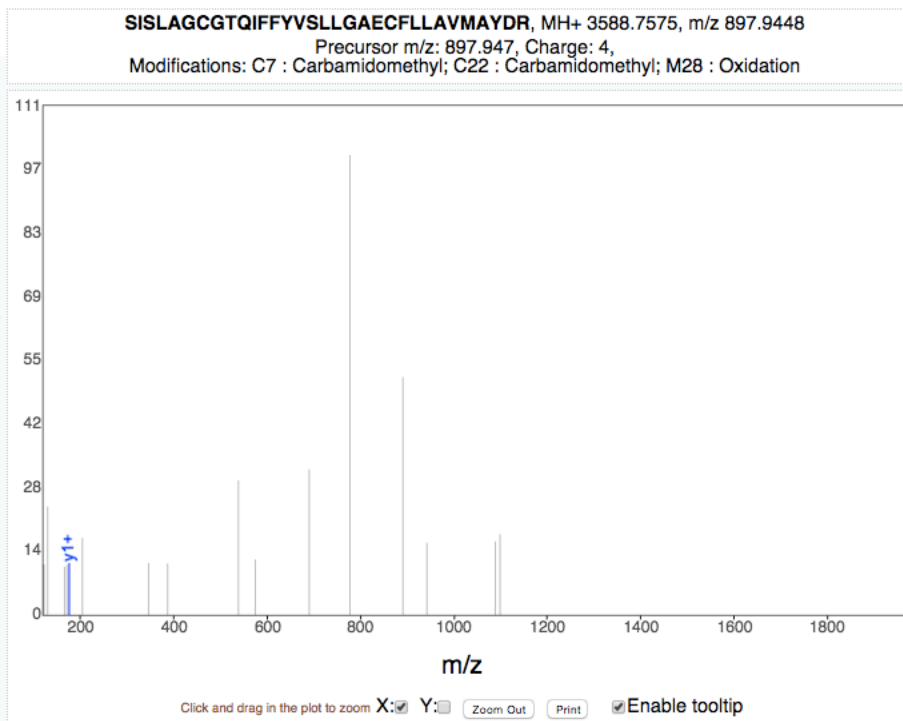

| b+        | b2+       | b3+       | Seq     | y+        | y2+       | y3+       |
|-----------|-----------|-----------|---------|-----------|-----------|-----------|
| 88.0393   | 44.5233   | 30.0180   | 1 S 32  |           |           |           |
| 201.1234  | 101.0653  | 67.7126   | 2 I 31  | 3501.7255 | 1751.3664 | 1167.9134 |
| 288.1554  | 144.5813  | 96.7233   | 3 S 30  | 3388.6415 | 1694.8244 | 1130.2187 |
| 401.2395  | 201.1234  | 134.4180  | 4 L 29  | 3301.6094 | 1651.3084 | 1101.2080 |
| 472.2766  | 236.6419  | 158.0970  | 5 A 28  | 3188.5254 | 1594.7663 | 1063.5133 |
| 529.2980  | 265.1527  | 177.1042  | 6 G 27  | 3117.4882 | 1559.2478 | 1039.8343 |
| 689.3287  | 345.1680  | 230.4477  | 7 C 26  | 3060.4668 | 1530.7370 | 1020.8271 |
| 746.3502  | 373.6787  | 249.4549  | 8 G 25  | 2900.4361 | 1450.7217 | 967.4836  |
| 847.3978  | 424.2026  | 283.1375  | 9 T 24  | 2843.4147 | 1422.2110 | 948.4764  |
| 975.4564  | 488.2318  | 325.8237  | 10 Q 23 | 2742.3670 | 1371.6871 | 914.7938  |
| 1088.5405 | 544.7739  | 363.5183  | 11 I 22 | 2614.3084 | 1307.6578 | 872.1077  |
| 1235.6089 | 618.3081  | 412.5411  | 12 F 21 | 2501.2244 | 1251.1158 | 834.4130  |
| 1382.6773 | 691.8423  | 461.5640  | 13 F 20 | 2354.1559 | 1177.5816 | 785.3902  |
| 1545.7406 | 773.3740  | 515.9184  | 14 Y 19 | 2207.0875 | 1104.0474 | 736.3674  |
| 1644.8090 | 822.9082  | 548.9412  | 15 V 18 | 2044.0242 | 1022.5157 | 682.0129  |
| 1731.8411 | 866.4242  | 577.9519  | 16 S 17 | 1944.9558 | 972.9815  | 648.9901  |
| 1844.9251 | 922.9662  | 615.6466  | 17 L 16 | 1857.9238 | 929.4655  | 619.9794  |
| 1958.0092 | 979.5082  | 653.3412  | 18 L 15 | 1744.8397 | 872.9235  | 582.2847  |
| 2015.0307 | 1008.0190 | 672.3484  | 19 G 14 | 1631.7556 | 816.3815  | 544.5901  |
| 2086.0678 | 1043.5375 | 696.0274  | 20 A 13 | 1574.7342 | 787.8707  | 525.5829  |
| 2215.1104 | 1108.0588 | 739.0416  | 21 E 12 | 1503.6970 | 752.3522  | 501.9039  |
| 2375.1410 | 1188.0741 | 792.3852  | 22 C 11 | 1374.6545 | 687.8309  | 458.8897  |
| 2522.2094 | 1261.6084 | 841.4080  | 23 F 10 | 1214.6238 | 607.8155  | 405.5461  |
| 2635.2935 | 1318.1504 | 879.1027  | 24 L 9  | 1067.5554 | 534.2813  | 356.5233  |
| 2748.3776 | 1374.6924 | 916.7974  | 25 L 8  | 954.4713  | 477.7393  | 318.8286  |
| 2819.4147 | 1410.2110 | 940.4764  | 26 A 7  | 841.3873  | 421.1973  | 281.1339  |
| 2918.4831 | 1459.7452 | 973.4992  | 27 V 6  | 770.3502  | 385.6787  | 257.4549  |
| 3065.5185 | 1533.2629 | 1022.5110 | 28 M 5  | 671.2817  | 336.1445  | 224.4321  |
| 3136.5556 | 1568.7814 | 1046.1901 | 29 A 4  | 524.2463  | 262.6268  | 175.4203  |
| 3299.6189 | 1650.3131 | 1100.5445 | 30 Y 3  | 453.2092  | 227.1082  | 151.7413  |
| 3414.6459 | 1707.8266 | 1138.8868 | 31 D 2  | 290.1459  | 145.5766  | 97.3868   |
|           |           |           | 32 R 1  | 175.1190  | 88.0631   | 59.0445   |

SRM transitions

| Transition ID                          | Precursor m/z | Precursor charge | Fragment m/z | Relative intensity |
|----------------------------------------|---------------|------------------|--------------|--------------------|
| SISLAGcGTQIFFVSVLLGAECFLAVmAYDR.4.y1.1 | 897.945       | 4                | 175.119      | 100                |

## MS/MS spectrum

### Ions:

a  1+  2+  3+

b  1+  2+  3+

c  1+  2+  3+

x  1+  2+  3+

y  1+  2+  3+

z  1+  2+  3+

[\[Deselect All\]](#)

### Neutral Loss:

H<sub>2</sub>O (o)

NH<sub>3</sub> (\*)

Mass Type:

Mono  Avg

Mass Tolerance: 0.05 Da

[Update](#)

Peak Assignment:

Most Intense

Nearest Match

Peak Labels:

Ion  m/z

None

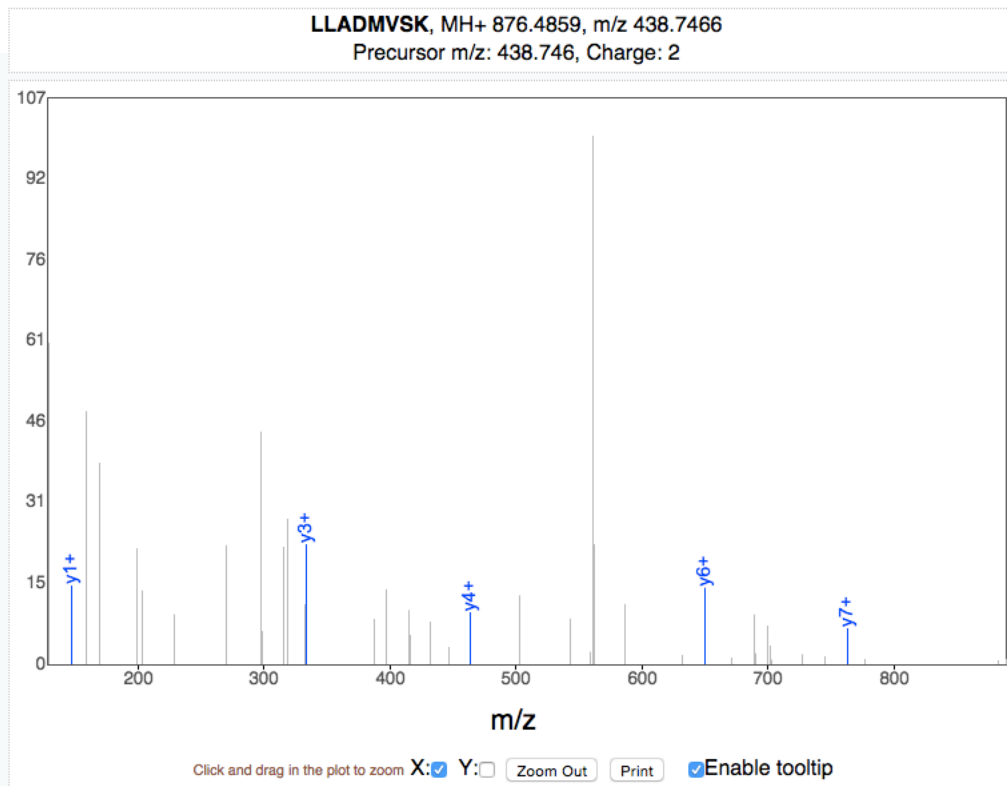

| b+       | Seq   | y+       |
|----------|-------|----------|
| 114.0913 | 1 L 8 |          |
| 227.1754 | 2 L 7 | 763.4019 |
| 298.2125 | 3 A 6 | 650.3178 |
| 413.2395 | 4 D 5 | 579.2807 |
| 544.2799 | 5 M 4 | 464.2537 |
| 643.3484 | 6 V 3 | 333.2132 |
| 730.3804 | 7 S 2 | 234.1448 |
| 8        | K 1   | 147.1128 |

## SRM transitions

| Transition ID   | Precursor m/z | Precursor charge | Fragment m/z | Relative intensity |
|-----------------|---------------|------------------|--------------|--------------------|
| LLADMVSK.2.y3.1 | 459.752       | 2                | 333.213      | 100                |
| LLADMVSK.2.y1.1 | 459.752       | 2                | 147.113      | 65                 |
| LLADMVSK.2.y6.1 | 459.752       | 2                | 650.318      | 63                 |
| LLADMVSK.2.b5.1 | 459.752       | 2                | 586.291      | 50                 |
| LLADMVSK.2.y4.1 | 459.752       | 2                | 464.254      | 42                 |
| LLADMVSK.2.y7.1 | 459.752       | 2                | 763.402      | 29                 |

MS/MS spectrum

Ions:

- a  1+  2+  3+
- b  1+  2+  3+
- c  1+  2+  3+
- x  1+  2+  3+
- y  1+  2+  3+
- z  1+  2+  3+

[Deselect All](#)

Neutral Loss:

- H<sub>2</sub>O (o)
- NH<sub>3</sub> (\*)

Mass Type:

- Mono  Avg

Mass Tolerance: 0.05 Da

[Update](#)

Peak Assignment:

- Most Intense
- Nearest Match

Peak Labels:

- Ion  m/z
- None

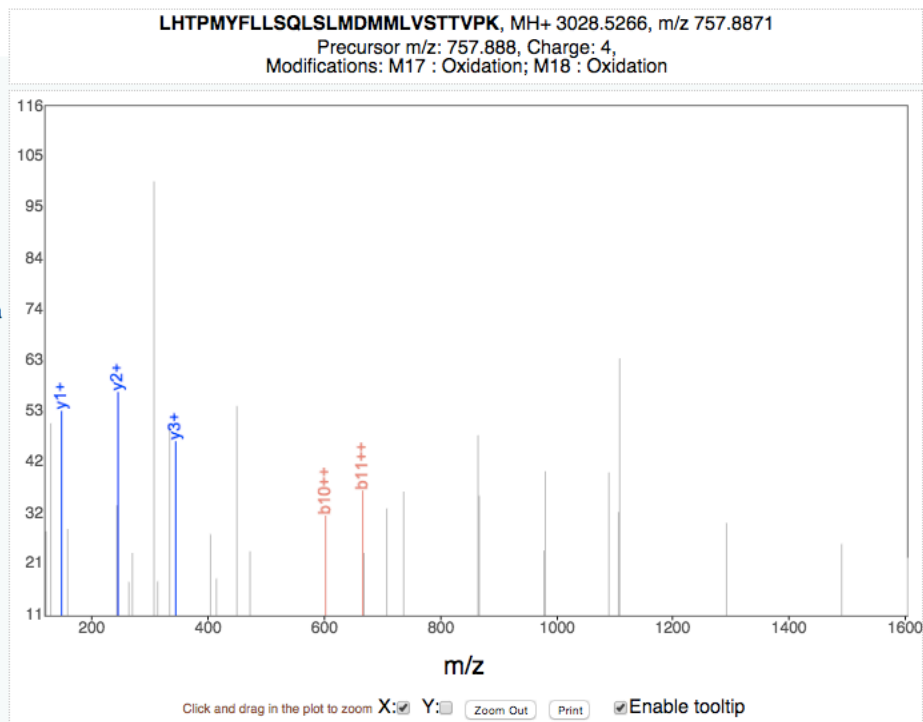

| b+        | b2+             | b3+      | Seq     | y+              | y2+       | y3+      |
|-----------|-----------------|----------|---------|-----------------|-----------|----------|
| 114.0913  | 57.5493         | 38.7020  | 1 L 26  |                 |           |          |
| 251.1503  | 126.0788        | 84.3883  | 2 H 25  | 2915.4425       | 1458.2249 | 972.4857 |
| 352.1979  | 176.6026        | 118.0708 | 3 T 24  | 2778.3836       | 1389.6955 | 926.7994 |
| 449.2507  | 225.1290        | 150.4217 | 4 P 23  | 2677.3360       | 1339.1716 | 893.1168 |
| 580.2912  | 290.6492        | 194.1019 | 5 M 22  | 2580.2832       | 1290.6452 | 860.7659 |
| 743.3545  | 372.1809        | 248.4564 | 6 Y 21  | 2449.2427       | 1225.1250 | 817.0858 |
| 890.4229  | 445.7151        | 297.4792 | 7 F 20  | 2286.1794       | 1143.5933 | 762.7313 |
| 1003.5070 | 502.2571        | 335.1738 | 8 L 19  | 2139.1110       | 1070.0591 | 713.7085 |
| 1116.5910 | 558.7992        | 372.8685 | 9 L 18  | 2026.0269       | 1013.5171 | 676.0138 |
| 1203.6231 | <b>602.3152</b> | 401.8792 | 10 S 17 | 1912.9428       | 956.9751  | 638.3191 |
| 1331.6817 | <b>666.3445</b> | 444.5654 | 11 Q 16 | 1825.9108       | 913.4590  | 609.3085 |
| 1444.7657 | 722.8865        | 482.2601 | 12 L 15 | 1697.8522       | 849.4298  | 566.6223 |
| 1531.7977 | 766.4025        | 511.2708 | 13 S 14 | 1584.7682       | 792.8877  | 528.9276 |
| 1644.8818 | 822.9445        | 548.9655 | 14 L 13 | 1497.7361       | 749.3717  | 499.9169 |
| 1775.9223 | 888.4648        | 592.6456 | 15 M 12 | 1384.6521       | 692.8297  | 462.2222 |
| 1890.9492 | 945.9783        | 630.9879 | 16 D 11 | 1253.6116       | 627.3094  | 418.5420 |
| 2037.9846 | 1019.4960       | 679.9997 | 17 M 10 | 1138.5846       | 569.7960  | 380.1997 |
| 2185.0200 | 1093.0137       | 729.0115 | 18 M 9  | 991.5492        | 496.2783  | 331.1879 |
| 2298.1041 | 1149.5557       | 766.7062 | 19 L 8  | 844.5138        | 422.7606  | 282.1761 |
| 2397.1725 | 1199.0899       | 799.7290 | 20 V 7  | 731.4298        | 366.2185  | 244.4814 |
| 2484.2045 | 1242.6059       | 828.7397 | 21 S 6  | 632.3614        | 316.6843  | 211.4586 |
| 2585.2522 | 1293.1297       | 862.4223 | 22 T 5  | 545.3293        | 273.1683  | 182.4480 |
| 2686.2999 | 1343.6536       | 896.1048 | 23 T 4  | 444.2817        | 222.6445  | 148.7654 |
| 2785.3683 | 1393.1878       | 929.1276 | 24 V 3  | <b>343.2340</b> | 172.1206  | 115.0828 |
| 2882.4211 | 1441.7142       | 961.4785 | 25 P 2  | <b>244.1656</b> | 122.5864  | 82.0600  |
|           |                 |          | 26 K 1  | <b>147.1128</b> | 74.0600   | 49.7091  |

SRM transitions

| Transition ID                      | Precursor m/z | Precursor charge | Fragment m/z | Relative intensity |
|------------------------------------|---------------|------------------|--------------|--------------------|
| LHTPMYFLLSQLSLMDmmLVSTTVPK.4.y2.1  | 757.887       | 4                | 244.166      | 100                |
| LHTPMYFLLSQLSLMDmmLVSTTVPK.4.y1.1  | 757.887       | 4                | 147.113      | 93                 |
| LHTPMYFLLSQLSLMDmmLVSTTVPK.4.y3.1  | 757.887       | 4                | 343.234      | 82                 |
| LHTPMYFLLSQLSLMDmmLVSTTVPK.4.b11.2 | 757.887       | 4                | 666.344      | 63                 |
| LHTPMYFLLSQLSLMDmmLVSTTVPK.4.b10.2 | 757.887       | 4                | 602.315      | 54                 |



## MS/MS spectrum

### Ions:

- a 1<sup>+</sup>  2<sup>+</sup>  3<sup>+</sup>  
 b 1<sup>+</sup>  2<sup>+</sup>  3<sup>+</sup>  
 c 1<sup>+</sup>  2<sup>+</sup>  3<sup>+</sup>  
 x 1<sup>+</sup>  2<sup>+</sup>  3<sup>+</sup>  
 y 1<sup>+</sup>  2<sup>+</sup>  3<sup>+</sup>  
 z 1<sup>+</sup>  2<sup>+</sup>  3<sup>+</sup>

[\[Deselect All\]](#)

### Neutral Loss:

- H<sub>2</sub>O (o)  
 NH<sub>3</sub> (\*)

### Mass Type:

- Mono  Avg

Mass Tolerance: 0.05 Da

[Update](#)

### Peak Assignment:

- Most Intense  
 Nearest Match

### Peak Labels:

- Ion  m/z  
 None

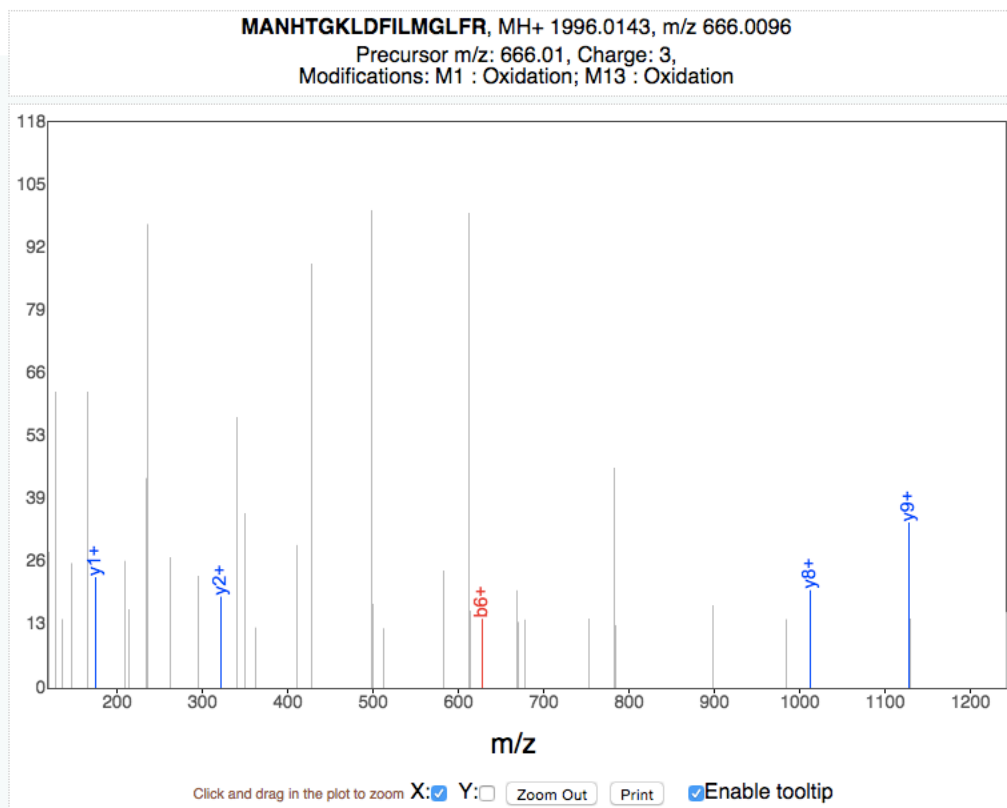

| b+              | b2+      | Seq    | y+               | y2+      |
|-----------------|----------|--------|------------------|----------|
| 148.0427        | 74.5250  | 1 M 17 |                  |          |
| 219.0798        | 110.0435 | 2 A 16 | 1848.9789        | 924.9931 |
| 333.1227        | 167.0650 | 3 N 15 | 1777.9418        | 889.4745 |
| 470.1816        | 235.5945 | 4 H 14 | 1663.8989        | 832.4531 |
| 571.2293        | 286.1183 | 5 T 13 | 1526.8399        | 763.9236 |
| <b>628.2508</b> | 314.6290 | 6 G 12 | 1425.7923        | 713.3998 |
| 756.3457        | 378.6765 | 7 K 11 | 1368.7708        | 684.8890 |
| 869.4298        | 435.2185 | 8 L 10 | 1240.6758        | 620.8416 |
| 984.4567        | 492.7320 | 9 D 9  | <b>1127.5918</b> | 564.2995 |
| 1131.5252       | 566.2662 | 10 F 8 | <b>1012.5648</b> | 506.7861 |
| 1244.6092       | 622.8082 | 11 I 7 | 865.4964         | 433.2518 |
| 1357.6933       | 679.3503 | 12 L 6 | 752.4124         | 376.7098 |
| 1504.7287       | 752.8680 | 13 M 5 | 639.3283         | 320.1678 |
| 1561.7501       | 781.3787 | 14 G 4 | 492.2929         | 246.6501 |
| 1674.8342       | 837.9207 | 15 L 3 | 435.2714         | 218.1394 |
| 1821.9026       | 911.4550 | 16 F 2 | <b>322.1874</b>  | 161.5973 |
|                 |          | 17 R 1 | <b>175.1190</b>  | 88.0631  |

## SRM transitions

| Transition ID              | Precursor m/z | Precursor charge | Fragment m/z | Relative intensity |
|----------------------------|---------------|------------------|--------------|--------------------|
| mANHTGKLDLFDLmGLFR.3.y9.1  | 666.01        | 3                | 1127.59      | 100                |
| mANHTGKLDLFDLmGLFR.3.y1.1  | 666.01        | 3                | 175.119      | 66                 |
| mANHTGKLDLFDLmGLFR.3.y8.1  | 666.01        | 3                | 1012.56      | 59                 |
| mANHTGKLDLFDLmGLFR.3.y2.1  | 666.01        | 3                | 322.187      | 55                 |
| mANHTGKLDLFDLmGLFR.3.y10.1 | 666.01        | 3                | 1240.68      | 45                 |
| mANHTGKLDLFDLmGLFR.3.b6.1  | 666.01        | 3                | 628.251      | 41                 |

## MS/MS spectrum

### Ions:

a  1+  2+  3+

b  1+  2+  3+

c  1+  2+  3+

x  1+  2+  3+

y  1+  2+  3+

z  1+  2+  3+

[\[Deselect All\]](#)

### Neutral Loss:

H<sub>2</sub>O (o)

NH<sub>3</sub> (\*)

### Mass Type:

Mono  Avg

Mass Tolerance:  Da

### Peak Assignment:

Most Intense

Nearest Match

### Peak Labels:

Ion  m/z

None

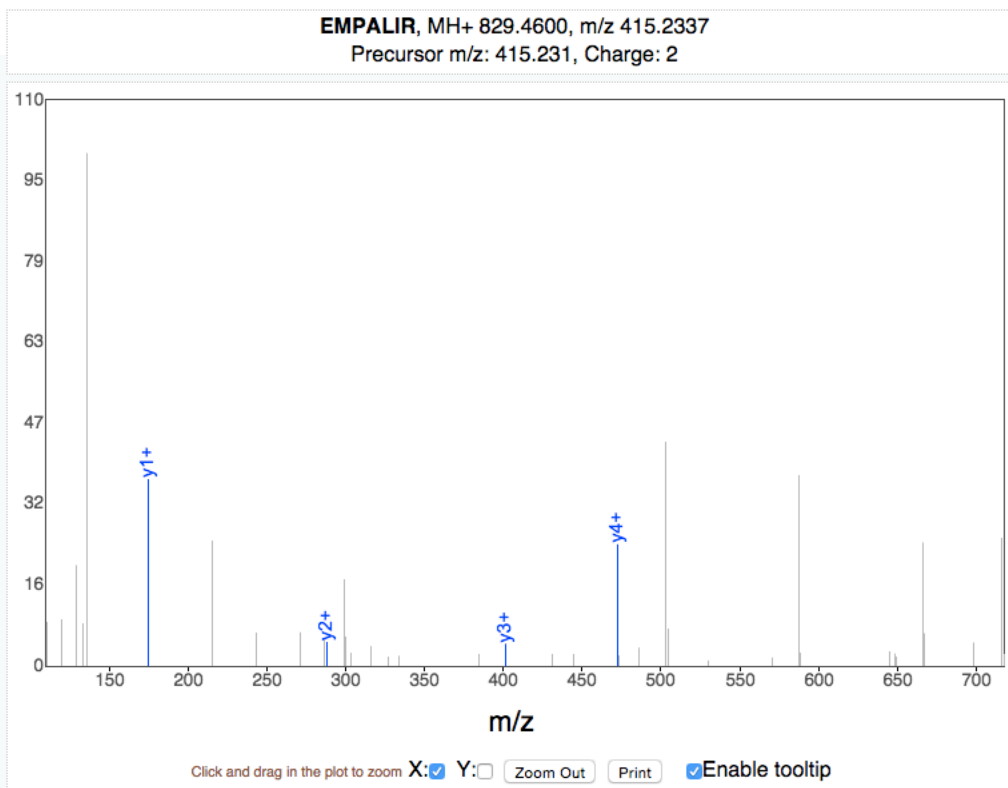

| b+       | Seq   | y+                       |
|----------|-------|--------------------------|
| 130.0499 | 1 E 7 |                          |
| 261.0904 | 2 M 6 | 700.4174                 |
| 358.1431 | 3 P 5 | 569.3770                 |
| 429.1802 | 4 A 4 | <a href="#">472.3242</a> |
| 542.2643 | 5 L 3 | <a href="#">401.2871</a> |
| 655.3484 | 6 I 2 | <a href="#">288.2030</a> |
|          | 7 R 1 | <a href="#">175.1190</a> |

## SRM transitions

| Transition ID  | Precursor m/z | Precursor charge | Fragment m/z | Relative intensity |
|----------------|---------------|------------------|--------------|--------------------|
| EMPALIR.2.y1.1 | 436.239       | 2                | 175.119      | 100                |
| EMPALIR.2.y4.1 | 436.239       | 2                | 472.324      | 65                 |
| EMPALIR.2.y2.1 | 436.239       | 2                | 288.203      | 12                 |
| EMPALIR.2.y3.1 | 436.239       | 2                | 401.287      | 11                 |

### MS/MS spectrum

#### Ions:

- 1<sup>+</sup>  2<sup>+</sup>  3<sup>+</sup>  
 1<sup>+</sup>  2<sup>+</sup>  3<sup>+</sup>

[\[Deselect All\]](#)

#### Neutral Loss:

- H<sub>2</sub>O (o)  
 NH<sub>3</sub> (\*)

#### Mass Type:

- Mono  Avg

Mass Tolerance:  Da

#### Peak Assignment:

- Most Intense  
 Nearest Match

#### Peak Labels:

- Ion  m/z  
 None

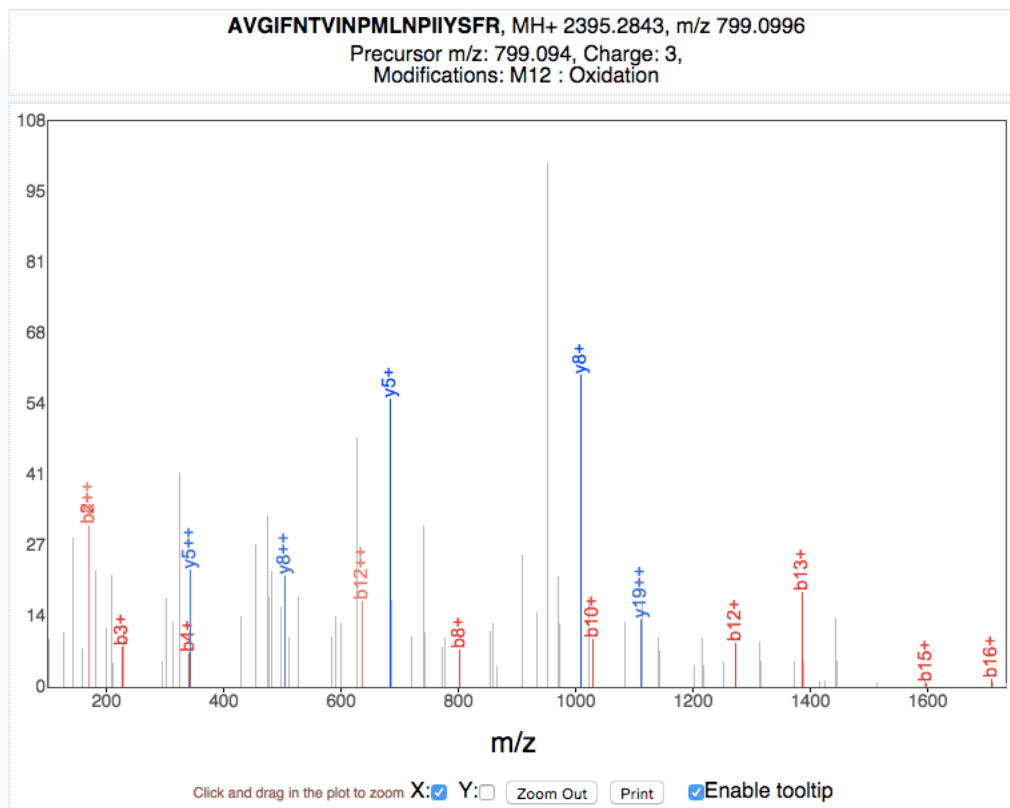

| b+               | b2+             | Seq     | y+               | y2+              |
|------------------|-----------------|---------|------------------|------------------|
| 72.0444          | 36.5258         | 1 A 21  |                  |                  |
| <b>171.1128</b>  | 86.0600         | 2 V 20  | 2324.2471        | 1162.6272        |
| <b>228.1343</b>  | 114.5708        | 3 G 19  | 2225.1787        | <b>1113.0930</b> |
| <b>341.2183</b>  | <b>171.1128</b> | 4 I 18  | 2168.1573        | 1084.5823        |
| 488.2867         | 244.6470        | 5 F 17  | 2055.0732        | 1028.0402        |
| 602.3297         | 301.6685        | 6 N 16  | 1908.0048        | 954.5060         |
| 703.3774         | 352.1923        | 7 T 15  | 1793.9619        | 897.4846         |
| <b>802.4458</b>  | 401.7265        | 8 V 14  | 1692.9142        | 846.9607         |
| 915.5298         | 458.2686        | 9 I 13  | 1593.8458        | 797.4265         |
| <b>1029.5728</b> | 515.2900        | 10 N 12 | 1480.7617        | 740.8845         |
| 1126.6255        | 563.8164        | 11 P 11 | 1366.7188        | 683.8630         |
| <b>1273.6609</b> | <b>637.3341</b> | 12 M 10 | 1269.6660        | 635.3366         |
| <b>1386.7450</b> | 693.8761        | 13 L 9  | 1122.6306        | 561.8189         |
| 1500.7879        | 750.8976        | 14 N 8  | <b>1009.5465</b> | <b>505.2769</b>  |
| <b>1597.8407</b> | 799.4240        | 15 P 7  | 895.5036         | 448.2554         |
| <b>1710.9247</b> | 855.9660        | 16 I 6  | 798.4509         | 399.7291         |
| 1824.0088        | 912.5080        | 17 I 5  | <b>685.3668</b>  | <b>343.1870</b>  |
| 1987.0721        | 994.0397        | 18 Y 4  | 572.2827         | 286.6450         |
| 2074.1042        | 1037.5557       | 19 S 3  | 409.2194         | 205.1133         |
| 2221.1726        | 1111.0899       | 20 F 2  | 322.1874         | 161.5973         |
|                  |                 | 21 R 1  | 175.1190         | 88.0631          |

### SRM transitions

| Transition ID                 | Precursor m/z | Precursor charge | Fragment m/z | Relative intensity |
|-------------------------------|---------------|------------------|--------------|--------------------|
| AVGIFNTVINPmLNPIIYSFR.3.y8.1  | 799.1         | 3                | 1009.55      | 100                |
| AVGIFNTVINPmLNPIIYSFR.3.y5.1  | 799.1         | 3                | 685.367      | 92                 |
| AVGIFNTVINPmLNPIIYSFR.3.b2.1  | 799.1         | 3                | 171.113      | 51                 |
| AVGIFNTVINPmLNPIIYSFR.3.b4.2  | 799.1         | 3                | 171.113      | 51                 |
| AVGIFNTVINPmLNPIIYSFR.3.y5.2  | 799.1         | 3                | 343.187      | 37                 |
| AVGIFNTVINPmLNPIIYSFR.3.y8.2  | 799.1         | 3                | 505.277      | 35                 |
| AVGIFNTVINPmLNPIIYSFR.3.b13.1 | 799.1         | 3                | 1386.74      | 30                 |

### MS/MS spectrum

#### Ions:

- a 1<sup>+</sup> 2<sup>+</sup> 3<sup>+</sup>  
 b 1<sup>+</sup> 2<sup>+</sup> 3<sup>+</sup>  
 c 1<sup>+</sup> 2<sup>+</sup> 3<sup>+</sup>  
 x 1<sup>+</sup> 2<sup>+</sup> 3<sup>+</sup>  
 y 1<sup>+</sup> 2<sup>+</sup> 3<sup>+</sup>  
 z 1<sup>+</sup> 2<sup>+</sup> 3<sup>+</sup>

[\[Deselect All\]](#)

#### Neutral Loss:

- H<sub>2</sub>O (o)  
 NH<sub>3</sub> (\*)

#### Mass Type:

- Mono  Avg

Mass Tolerance: 0.05 Da

[Update](#)

#### Peak Assignment:

- Most Intense  
 Nearest Match

#### Peak Labels:

- Ion  m/z  
 None

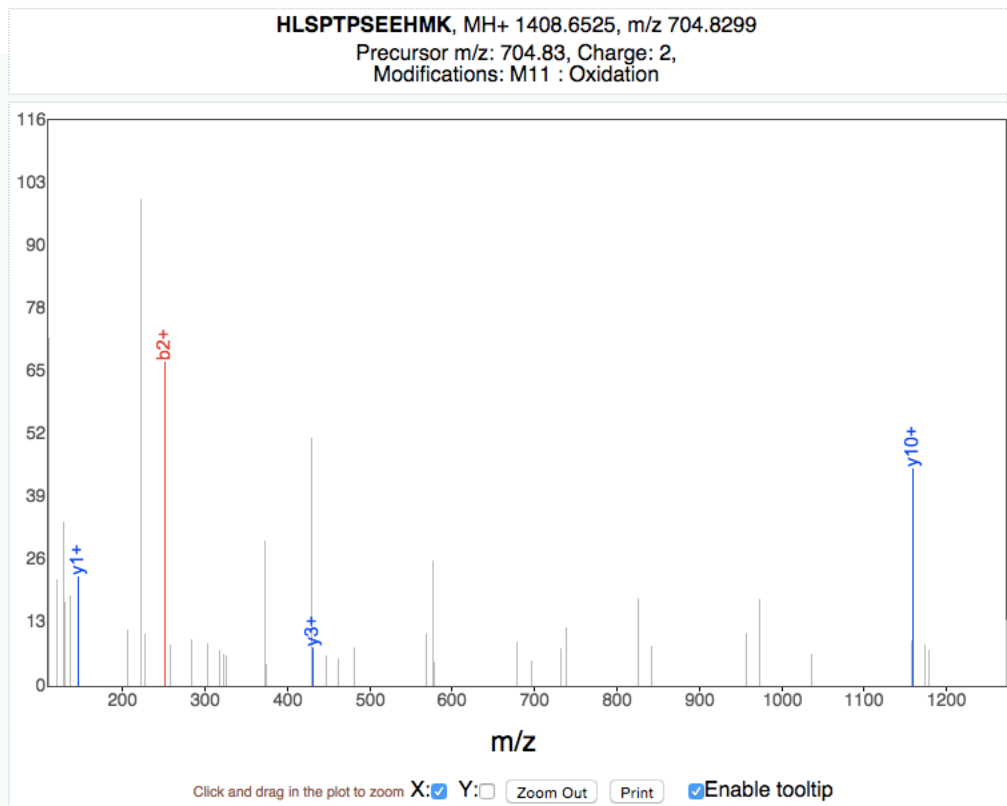

| b+              | Seq    | y+               |
|-----------------|--------|------------------|
| 138.0662        | 1 H 12 |                  |
| <b>251.1503</b> | 2 L 11 | 1271.5936        |
| 338.1823        | 3 S 10 | <b>1158.5096</b> |
| 435.2350        | 4 P 9  | 1071.4775        |
| 536.2827        | 5 T 8  | 974.4248         |
| 633.3355        | 6 P 7  | 873.3771         |
| 720.3675        | 7 S 6  | 776.3243         |
| 849.4101        | 8 E 5  | 689.2923         |
| 978.4527        | 9 E 4  | 560.2497         |
| 1115.5116       | 10 H 3 | <b>431.2071</b>  |
| 1262.5470       | 11 M 2 | 294.1482         |
|                 | 12 K 1 | <b>147.1128</b>  |

### SRM transitions

| Transition ID        | Precursor m/z | Precursor charge | Fragment m/z | Relative intensity |
|----------------------|---------------|------------------|--------------|--------------------|
| HLSPTPSEEHMK.2.b2.1  | 704.83        | 2                | 251.15       | 100                |
| HLSPTPSEEHMK.2.y10.1 | 704.83        | 2                | 1158.51      | 67                 |
| HLSPTPSEEHMK.2.y1.1  | 704.83        | 2                | 147.113      | 33                 |
| HLSPTPSEEHMK.2.y11.1 | 704.83        | 2                | 1271.59      | 20                 |
| HLSPTPSEEHMK.2.y3.1  | 704.83        | 2                | 431.207      | 11                 |
| HLSPTPSEEHMK.2.b12.2 | 704.83        | 2                | 695.825      | 7                  |

### MS/MS spectrum

#### Ions:

- 1<sup>+</sup>  2<sup>+</sup>  3<sup>+</sup>  
 1<sup>+</sup>  2<sup>+</sup>  3<sup>+</sup>

[\[Deselect All\]](#)

#### Neutral Loss:

- H<sub>2</sub>O (o)  
 NH<sub>3</sub> (\*)

#### Mass Type:

- Mono  Avg

Mass Tolerance: 0.05 Da

[Update](#)

#### Peak Assignment:

- Most Intense  
 Nearest Match

#### Peak Labels:

- Ion  m/z  
 None

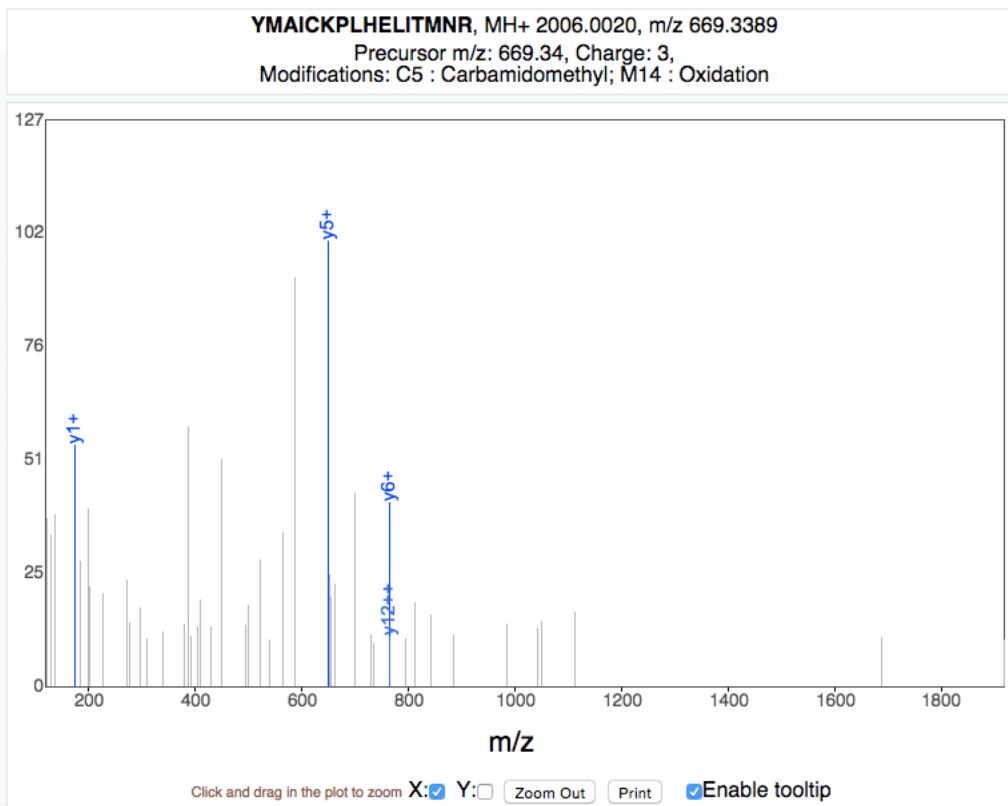

| b+        | b2+      | Seq    | y+                       | y2+                      |
|-----------|----------|--------|--------------------------|--------------------------|
| 164.0706  | 82.5389  | 1 Y 16 |                          |                          |
| 295.1111  | 148.0592 | 2 M 15 | 1842.9387                | 921.9730                 |
| 366.1482  | 183.5777 | 3 A 14 | 1711.8982                | 856.4527                 |
| 479.2323  | 240.1198 | 4 I 13 | 1640.8611                | 820.9342                 |
| 639.2629  | 320.1351 | 5 C 12 | 1527.7770                | <a href="#">764.3922</a> |
| 767.3579  | 384.1826 | 6 K 11 | 1367.7464                | 684.3768                 |
| 864.4106  | 432.7090 | 7 P 10 | 1239.6514                | 620.3293                 |
| 977.4947  | 489.2510 | 8 L 9  | 1142.5987                | 571.8030                 |
| 1114.5536 | 557.7804 | 9 H 8  | 1029.5146                | 515.2609                 |
| 1243.5962 | 622.3017 | 10 E 7 | 892.4557                 | 446.7315                 |
| 1356.6803 | 678.8438 | 11 L 6 | <a href="#">763.4131</a> | 382.2102                 |
| 1469.7643 | 735.3858 | 12 I 5 | <a href="#">650.3290</a> | 325.6681                 |
| 1570.8120 | 785.9096 | 13 T 4 | 537.2450                 | 269.1261                 |
| 1717.8474 | 859.4273 | 14 M 3 | 436.1973                 | 218.6023                 |
| 1831.8903 | 916.4488 | 15 N 2 | 289.1619                 | 145.0846                 |
|           |          | 16 R 1 | <a href="#">175.1190</a> | 88.0631                  |

### SRM transitions

| Transition ID            | Precursor m/z | Precursor charge | Fragment m/z | Relative intensity |
|--------------------------|---------------|------------------|--------------|--------------------|
| YMAIcKPLHELITmNR.3.y5.1  | 669.339       | 3                | 650.329      | 100                |
| YMAIcKPLHELITmNR.3.y1.1  | 669.339       | 3                | 175.119      | 54                 |
| YMAIcKPLHELITmNR.3.y6.1  | 669.339       | 3                | 763.413      | 41                 |
| YMAIcKPLHELITmNR.3.y12.2 | 669.339       | 3                | 764.392      | 11                 |

## MS/MS spectrum

### Ions:

a  1+  2+  3+

b  1+  2+  3+

c  1+  2+  3+

x  1+  2+  3+

y  1+  2+  3+

z  1+  2+  3+

[\[Deselect All\]](#)

### Neutral Loss:

H<sub>2</sub>O (o)

NH<sub>3</sub> (\*)

### Mass Type:

Mono  Avg

Mass Tolerance:  Da

### Peak Assignment:

Most Intense

Nearest Match

### Peak Labels:

Ion  m/z

None

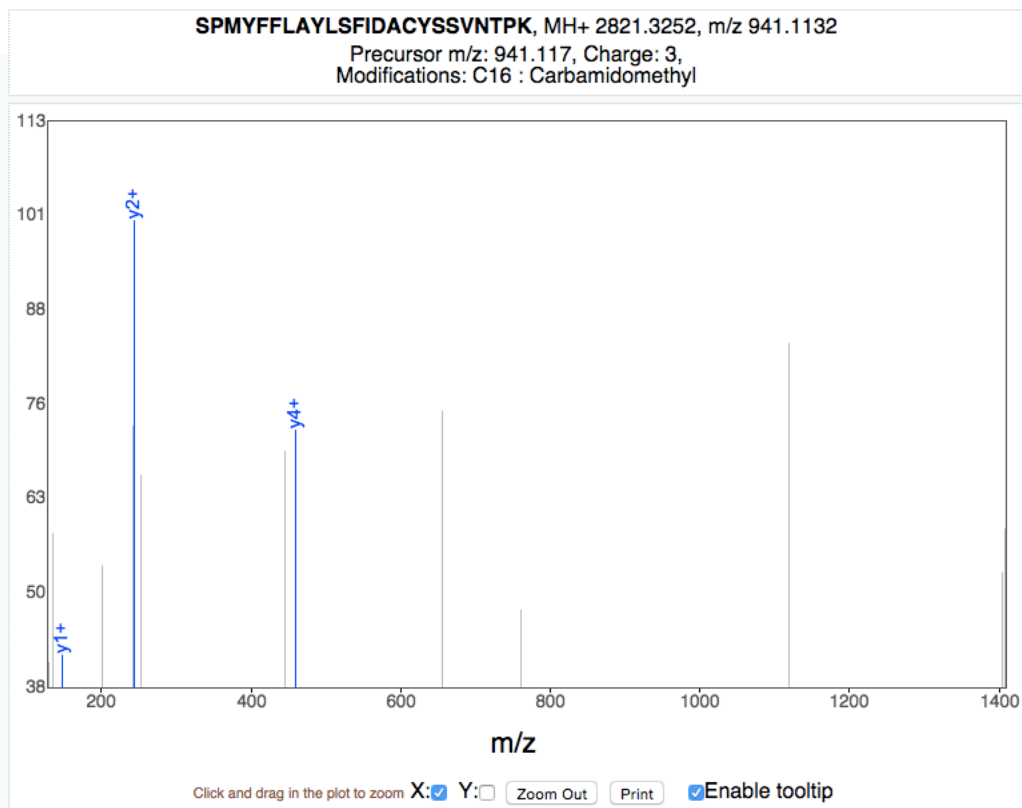

| b+        | b2+       | Seq     | y+        | y2+       |
|-----------|-----------|---------|-----------|-----------|
| 88.0393   | 44.5233   | 1 S 24  |           |           |
| 185.0921  | 93.0497   | 2 P 23  | 2734.2932 | 1367.6502 |
| 316.1326  | 158.5699  | 3 M 22  | 2637.2404 | 1319.1238 |
| 479.1959  | 240.1016  | 4 Y 21  | 2506.1999 | 1253.6036 |
| 626.2643  | 313.6358  | 5 F 20  | 2343.1366 | 1172.0719 |
| 773.3327  | 387.1700  | 6 F 19  | 2196.0682 | 1098.5377 |
| 886.4168  | 443.7120  | 7 L 18  | 2048.9998 | 1025.0035 |
| 957.4539  | 479.2306  | 8 A 17  | 1935.9157 | 968.4615  |
| 1120.5172 | 560.7622  | 9 Y 16  | 1864.8786 | 932.9429  |
| 1233.6013 | 617.3043  | 10 L 15 | 1701.8152 | 851.4113  |
| 1320.6333 | 660.8203  | 11 S 14 | 1588.7312 | 794.8692  |
| 1467.7017 | 734.3545  | 12 F 13 | 1501.6992 | 751.3532  |
| 1580.7858 | 790.8965  | 13 I 12 | 1354.6307 | 677.8190  |
| 1695.8127 | 848.4100  | 14 D 11 | 1241.5467 | 621.2770  |
| 1766.8498 | 883.9286  | 15 A 10 | 1126.5197 | 563.7635  |
| 1926.8805 | 963.9439  | 16 C 9  | 1055.4826 | 528.2449  |
| 2089.9438 | 1045.4755 | 17 Y 8  | 895.4520  | 448.2296  |
| 2176.9758 | 1088.9916 | 18 S 7  | 732.3886  | 366.6980  |
| 2264.0079 | 1132.5076 | 19 S 6  | 645.3566  | 323.1819  |
| 2363.0763 | 1182.0418 | 20 V 5  | 558.3246  | 279.6659  |
| 2477.1192 | 1239.0632 | 21 N 4  | 459.2562  | 230.1317  |
| 2578.1669 | 1289.5871 | 22 T 3  | 345.2132  | 173.1103  |
| 2675.2197 | 1338.1135 | 23 P 2  | 244.1656  | 122.5864  |
|           |           | 24 K 1  | 147.1128  | 74.0600   |

## SRM transitions

| Transition ID                   | Precursor m/z | Precursor charge | Fragment m/z | Relative intensity |
|---------------------------------|---------------|------------------|--------------|--------------------|
| SPMYFFLAYLSFIDAcYSSVNTPK.3.y2.1 | 941.113       | 3                | 244.166      | 100                |
| SPMYFFLAYLSFIDAcYSSVNTPK.3.y4.1 | 941.113       | 3                | 459.256      | 72                 |
| SPMYFFLAYLSFIDAcYSSVNTPK.3.y1.1 | 941.113       | 3                | 147.113      | 42                 |

MS/MS spectrum

- Ions:  
**a**  1+  2+  3+  
**b**  1+  2+  3+  
**c**  1+  2+  3+  
**x**  1+  2+  3+  
**y**  1+  2+  3+  
**z**  1+  2+  3+

Neutral Loss:

- H<sub>2</sub>O (o)  
 NH<sub>3</sub> (\*)

Mass Type:

- Mono  Avg

Mass Tolerance: 0.05 Da

Peak Assignment:

- Most Intense  
 Nearest Match

Peak Labels:

- Ion  m/z  
 None

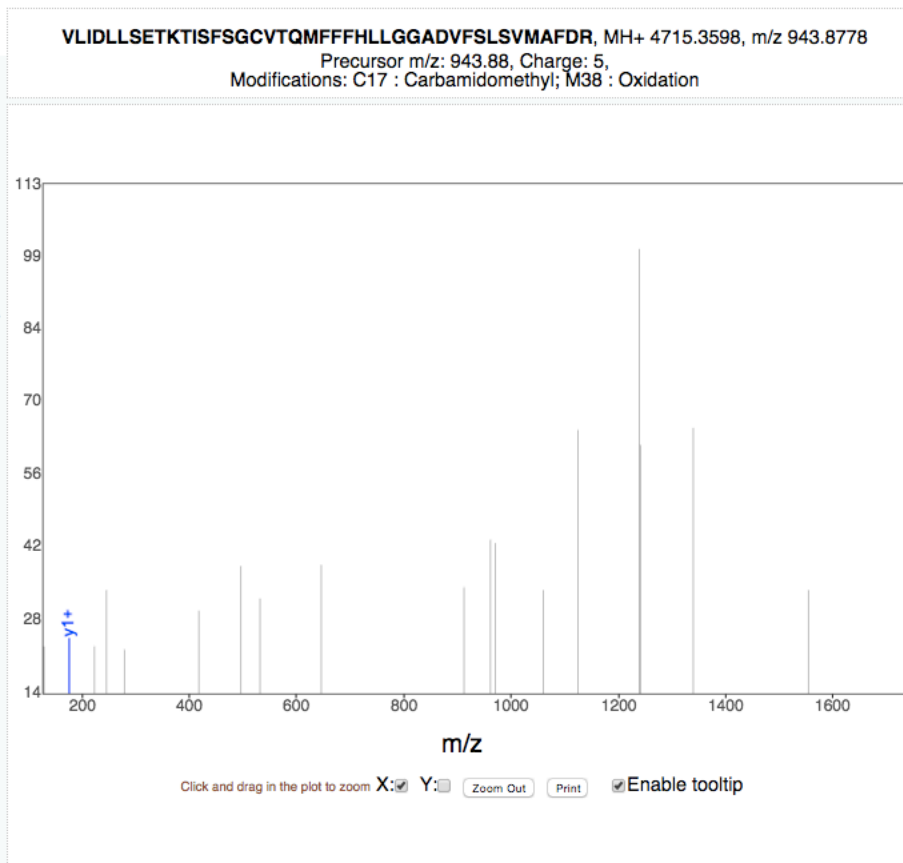

| b+        | b2+       | b3+       | Seq | y+ | y2+ | y3+       |
|-----------|-----------|-----------|-----|----|-----|-----------|
| 100.0757  | 50.5415   | 34.0301   | 1   | V  | 42  |           |
| 213.1598  | 107.0835  | 71.7248   | 2   | L  | 41  | 4616.2914 |
| 326.2438  | 163.6255  | 109.4195  | 3   | I  | 40  | 4503.2073 |
| 441.2708  | 221.1390  | 147.7618  | 4   | D  | 39  | 4390.1233 |
| 554.3548  | 277.6811  | 185.4565  | 5   | L  | 38  | 4275.0963 |
| 667.4389  | 334.2231  | 223.1511  | 6   | L  | 37  | 4162.0123 |
| 754.4709  | 377.7391  | 252.1618  | 7   | S  | 36  | 4048.9282 |
| 883.5135  | 442.2604  | 295.1760  | 8   | E  | 35  | 3961.8962 |
| 984.5612  | 492.7842  | 328.8586  | 9   | T  | 34  | 3832.8536 |
| 1112.6562 | 556.8317  | 371.5569  | 10  | K  | 33  | 3731.8059 |
| 1213.7038 | 607.3556  | 405.2395  | 11  | T  | 32  | 3603.7109 |
| 1326.7879 | 663.8976  | 442.9341  | 12  | I  | 31  | 3502.6633 |
| 1413.8199 | 707.4136  | 471.9448  | 13  | S  | 30  | 3389.5792 |
| 1560.8883 | 780.9478  | 520.9676  | 14  | F  | 29  | 3302.5472 |
| 1647.9204 | 824.4638  | 549.9783  | 15  | S  | 28  | 3155.4787 |
| 1704.9418 | 852.9746  | 568.9855  | 16  | G  | 27  | 3068.4467 |
| 1864.9725 | 932.9899  | 622.3290  | 17  | C  | 26  | 3011.4253 |
| 1964.0409 | 982.5241  | 655.3518  | 18  | V  | 25  | 2851.3946 |
| 2065.0886 | 1033.0479 | 689.0344  | 19  | T  | 24  | 2752.3262 |
| 2193.1471 | 1097.0772 | 731.7206  | 20  | Q  | 23  | 2651.2785 |
| 2324.1876 | 1162.5975 | 775.4007  | 21  | M  | 22  | 2523.2199 |
| 2471.2560 | 1236.1317 | 824.4235  | 22  | F  | 21  | 2392.1795 |
| 2618.3245 | 1309.6659 | 873.4463  | 23  | F  | 20  | 2245.1110 |
| 2765.3929 | 1383.2001 | 922.4691  | 24  | F  | 19  | 2098.0426 |
| 2902.4518 | 1451.7295 | 968.1554  | 25  | H  | 18  | 1950.9742 |
| 3015.5359 | 1508.2716 | 1005.8501 | 26  | L  | 17  | 1813.9153 |
| 3128.6199 | 1564.8136 | 1043.5448 | 27  | L  | 16  | 1700.8312 |
| 3185.6414 | 1593.3243 | 1062.5520 | 28  | G  | 15  | 1587.7472 |
| 3242.6628 | 1621.8351 | 1081.5591 | 29  | G  | 14  | 1530.7257 |
| 3313.7000 | 1657.3536 | 1105.2382 | 30  | A  | 13  | 1473.7042 |
| 3428.7269 | 1714.8671 | 1143.5805 | 31  | D  | 12  | 1402.6671 |
| 3527.7953 | 1764.4013 | 1176.6033 | 32  | V  | 11  | 1287.6402 |
| 3674.8637 | 1837.9355 | 1225.6261 | 33  | F  | 10  | 1188.5718 |
| 3761.8958 | 1881.4515 | 1254.6368 | 34  | S  | 9   | 1041.5034 |
| 3874.9798 | 1937.9935 | 1292.3315 | 35  | L  | 8   | 954.4713  |
| 3962.0118 | 1981.5096 | 1321.3421 | 36  | S  | 7   | 841.3873  |
| 4061.0803 | 2031.0438 | 1354.3649 | 37  | V  | 6   | 754.3552  |
| 4208.1157 | 2104.5615 | 1403.3767 | 38  | M  | 5   | 655.2868  |
| 4279.1528 | 2140.0800 | 1427.0558 | 39  | A  | 4   | 508.2514  |
| 4426.2212 | 2213.6142 | 1476.0786 | 40  | F  | 3   | 437.2143  |
| 4541.2481 | 2271.1277 | 1514.4209 | 41  | D  | 2   | 290.1459  |
|           |           |           | 42  | R  | 1   | 175.1190  |

SRM transitions

| Transition ID                                    | Precursor m/z | Precursor charge | Fragment m/z | Relative intensity |
|--------------------------------------------------|---------------|------------------|--------------|--------------------|
| VLIDLLSETKTISFSGcVTQMFFHLLGGADVFSLsVMAFDR.5.y1.1 | 943.878       | 5                | 175.119      | 100                |

MS/MS spectrum

Ions:

- a  1+  2+  3+
- b  1+  2+  3+
- c  1+  2+  3+
- x  1+  2+  3+
- y  1+  2+  3+
- z  1+  2+  3+

[Deselect All](#)

Neutral Loss:

- H<sub>2</sub>O (o)
- NH<sub>3</sub> (\*)

Mass Type:

- Mono  Avg

Mass Tolerance: 0.05 Da

[Update](#)

Peak Assignment:

- Most Intense
- Nearest Match

Peak Labels:

- Ion  m/z
- None

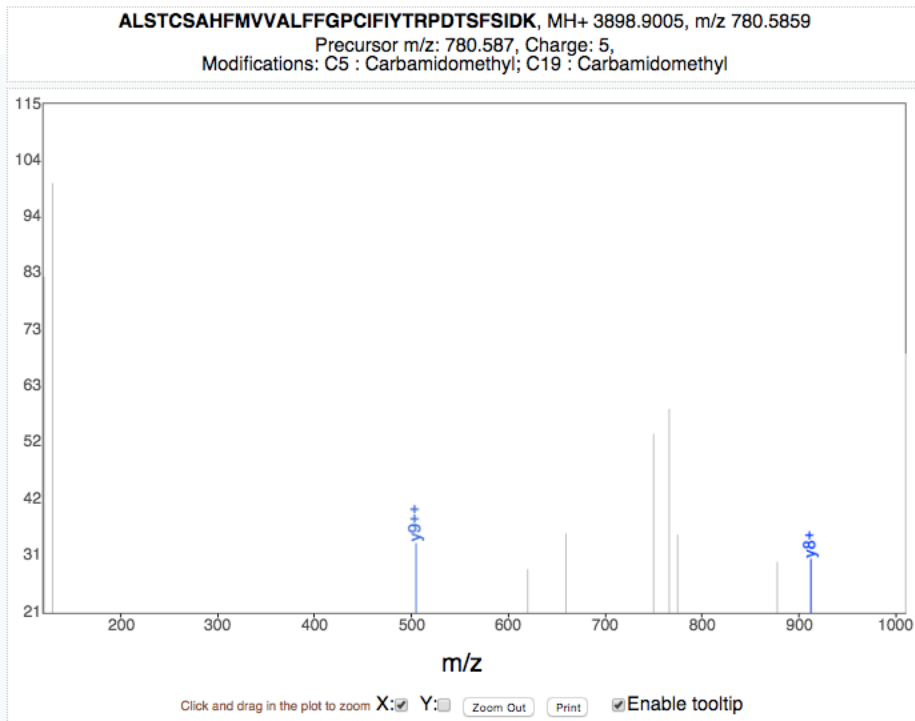

| b+        | b2+       | b3+       | Seq     | y+              | y2+             | y3+       |
|-----------|-----------|-----------|---------|-----------------|-----------------|-----------|
| 72.0444   | 36.5258   | 24.6863   | 1 A 34  |                 |                 |           |
| 185.1285  | 93.0679   | 62.3810   | 2 L 33  | 3827.8634       | 1914.4353       | 1276.6260 |
| 272.1605  | 136.5839  | 91.3917   | 3 S 32  | 3714.7793       | 1857.8933       | 1238.9313 |
| 373.2082  | 187.1077  | 125.0742  | 4 T 31  | 3627.7473       | 1814.3773       | 1209.9206 |
| 533.2388  | 267.1230  | 178.4178  | 5 C 30  | 3526.6996       | 1763.8535       | 1176.2381 |
| 620.2708  | 310.6391  | 207.4285  | 6 S 29  | 3366.6690       | 1683.8381       | 1122.8945 |
| 691.3080  | 346.1576  | 231.1075  | 7 A 28  | 3279.6370       | 1640.3221       | 1093.8838 |
| 828.3669  | 414.6871  | 276.7938  | 8 H 27  | 3208.5998       | 1604.8036       | 1070.2048 |
| 975.4353  | 488.2213  | 325.8166  | 9 F 26  | 3071.5409       | 1536.2741       | 1024.5185 |
| 1106.4758 | 553.7415  | 369.4968  | 10 M 25 | 2924.4725       | 1462.7399       | 975.4957  |
| 1205.5442 | 603.2757  | 402.5196  | 11 V 24 | 2793.4320       | 1397.2197       | 931.8155  |
| 1304.6126 | 652.8099  | 435.5424  | 12 V 23 | 2694.3636       | 1347.6854       | 898.7927  |
| 1375.6497 | 688.3285  | 459.2214  | 13 A 22 | 2595.2952       | 1298.1512       | 865.7699  |
| 1488.7338 | 744.8705  | 496.9161  | 14 L 21 | 2524.2581       | 1262.6327       | 842.0909  |
| 1635.8022 | 818.4047  | 545.9389  | 15 F 20 | 2411.1740       | 1206.0907       | 804.3962  |
| 1782.8706 | 891.9389  | 594.9617  | 16 F 19 | 2264.1056       | 1132.5564       | 755.3734  |
| 1839.8921 | 920.4497  | 613.9689  | 17 G 18 | 2117.0372       | 1059.0222       | 706.3506  |
| 1936.9448 | 968.9760  | 646.3198  | 18 P 17 | 2060.0157       | 1030.5115       | 687.3434  |
| 2096.9755 | 1048.9914 | 699.6633  | 19 C 16 | 1962.9630       | 981.9851        | 654.9925  |
| 2210.0595 | 1105.5334 | 737.3580  | 20 I 15 | 1802.9323       | 901.9698        | 601.6490  |
| 2357.1279 | 1179.0676 | 786.3808  | 21 F 14 | 1689.8483       | 845.4278        | 563.9543  |
| 2470.2120 | 1235.6096 | 824.0755  | 22 I 13 | 1542.7798       | 771.8936        | 514.9315  |
| 2633.2753 | 1317.1413 | 878.4300  | 23 Y 12 | 1429.6958       | 715.3515        | 477.2368  |
| 2734.3230 | 1367.6651 | 912.1125  | 24 T 11 | 1266.6325       | 633.8199        | 422.8823  |
| 2890.4241 | 1445.7157 | 964.1462  | 25 R 10 | 1165.5848       | 583.2960        | 389.1998  |
| 2987.4769 | 1494.2421 | 996.4971  | 26 P 9  | 1009.4837       | <b>505.2455</b> | 337.1661  |
| 3102.5038 | 1551.7556 | 1034.8395 | 27 D 8  | <b>912.4309</b> | 456.7191        | 304.8152  |
| 3203.5515 | 1602.2794 | 1068.5220 | 28 T 7  | 797.4040        | 399.2056        | 266.4728  |
| 3290.5835 | 1645.7954 | 1097.5327 | 29 S 6  | 696.3563        | 348.6818        | 232.7903  |
| 3437.6520 | 1719.3296 | 1146.5555 | 30 F 5  | 609.3243        | 303.1658        | 203.7796  |
| 3524.6840 | 1762.8456 | 1175.5662 | 31 S 4  | 462.2558        | 231.6316        | 154.7568  |
| 3637.7681 | 1819.3877 | 1213.2609 | 32 I 3  | 375.2238        | 188.1155        | 125.7461  |
| 3752.7950 | 1876.9011 | 1251.6032 | 33 D 2  | 262.1397        | 131.5735        | 88.0514   |
|           |           |           | 34 K 1  | 147.1128        | 74.0600         | 49.7091   |

SRM transitions

| Transition ID                             | Precursor m/z | Precursor charge | Fragment m/z | Relative intensity |
|-------------------------------------------|---------------|------------------|--------------|--------------------|
| ALSTcSAHFMVVALFFGPCIFIYTRPDTSFSIDK.5.y9.1 | 780.586       | 5                | 1009.48      | 100                |
| ALSTcSAHFMVVALFFGPCIFIYTRPDTSFSIDK.5.y9.2 | 780.586       | 5                | 505.245      | 49                 |
| ALSTcSAHFMVVALFFGPCIFIYTRPDTSFSIDK.5.y8.1 | 780.586       | 5                | 912.431      | 44                 |



MS/MS spectrum

Ions:

- 1<sup>+</sup>  2<sup>+</sup>  3<sup>+</sup>

Neutral Loss:

- H<sub>2</sub>O (o)
- NH<sub>3</sub> (\*)

Mass Type:

- Mono  Avg

Mass Tolerance: 0.05 Da

Peak Assignment:

- Most Intense
- Nearest Match
- Peak Labels:
  - Ion m/z
  - None

TISFGGCVVQIFFIHAVGGTEMVLLIAMAFDRYVAICPLHYLTIMNPQR, MH+ 5729.9330, m/z 955.8282  
 Precursor m/z: 955.829, Charge: 6,  
 Modifications: C7 : Carbamidomethyl; M22 : Oxidation; M28 : Oxidation; C37 : Carbamidomethyl

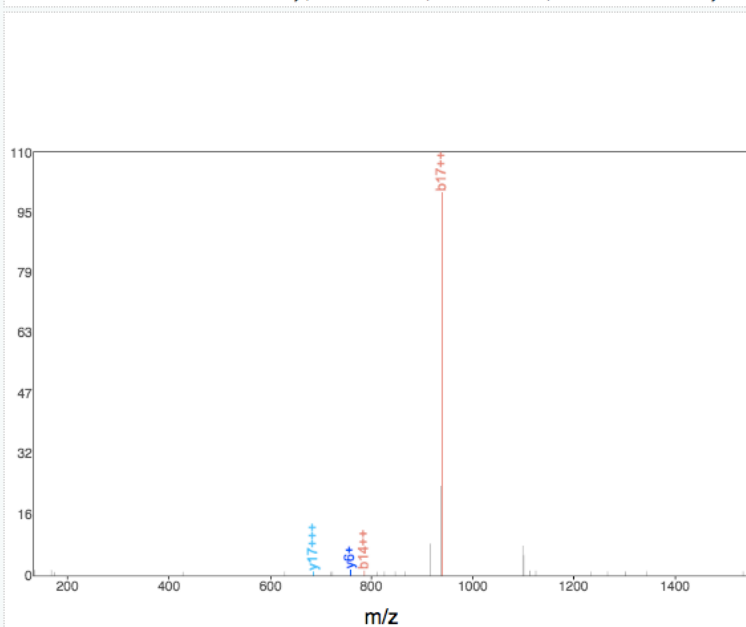

| b+        | b2+             | b3+       | Seq | y+ | y2+ | y3+             |
|-----------|-----------------|-----------|-----|----|-----|-----------------|
| 102.0550  | 51.5311         | 34.6898   | 1   | T  | 50  |                 |
| 215.1390  | 108.0731        | 72.3845   | 2   | I  | 49  | 5628.8853       |
| 302.1710  | 151.5892        | 101.3952  | 3   | S  | 48  | 5515.8012       |
| 449.2395  | 225.1234        | 150.4180  | 4   | F  | 47  | 5428.7692       |
| 506.2609  | 253.6341        | 169.4252  | 5   | G  | 46  | 5281.7008       |
| 563.2824  | 282.1448        | 188.4323  | 6   | G  | 45  | 5224.6793       |
| 723.3130  | 362.1602        | 241.7759  | 7   | C  | 44  | 5167.6579       |
| 822.3815  | 411.6944        | 274.7987  | 8   | V  | 43  | 5007.6272       |
| 921.4499  | 461.2286        | 307.8215  | 9   | V  | 42  | 4908.5588       |
| 1049.5084 | 525.2579        | 350.5077  | 10  | Q  | 41  | 4809.4904       |
| 1162.5925 | 581.7999        | 388.2024  | 11  | I  | 40  | 4681.4318       |
| 1309.6609 | 655.3341        | 437.2252  | 12  | F  | 39  | 4568.3477       |
| 1456.7293 | 728.8683        | 486.2480  | 13  | F  | 38  | 4421.2793       |
| 1569.8134 | <b>785.4103</b> | 523.9427  | 14  | I  | 37  | 4274.2109       |
| 1706.8723 | 853.9398        | 569.6290  | 15  | H  | 36  | 4161.1269       |
| 1777.9094 | 889.4583        | 593.3080  | 16  | A  | 35  | 4024.0679       |
| 1876.9778 | <b>938.9926</b> | 626.3308  | 17  | V  | 34  | 3953.0308       |
| 1933.9993 | 967.5033        | 645.3380  | 18  | G  | 33  | 3853.9624       |
| 1991.0208 | 996.0140        | 664.3451  | 19  | G  | 32  | 3796.9409       |
| 2092.0684 | 1046.5379       | 698.0277  | 20  | T  | 31  | 3739.9195       |
| 2221.1110 | 1111.0592       | 741.0419  | 21  | E  | 30  | 3638.8718       |
| 2368.1464 | 1184.5769       | 790.0537  | 22  | M  | 29  | 3509.8292       |
| 2467.2149 | 1234.1111       | 823.0765  | 23  | V  | 28  | 3362.7938       |
| 2580.2989 | 1290.6531       | 860.7712  | 24  | L  | 27  | 3263.7254       |
| 2693.3830 | 1347.1951       | 898.4658  | 25  | L  | 26  | 3150.6413       |
| 2806.4670 | 1403.7372       | 936.1605  | 26  | I  | 25  | 3037.5573       |
| 2877.5042 | 1439.2557       | 959.8396  | 27  | A  | 24  | 2924.4732       |
| 3024.5396 | 1512.7734       | 1008.8514 | 28  | M  | 23  | 2853.4361       |
| 3095.5767 | 1548.2920       | 1032.5304 | 29  | A  | 22  | 2706.4007       |
| 3242.6451 | 1621.8262       | 1081.5532 | 30  | F  | 21  | 2635.3636       |
| 3357.6720 | 1679.3397       | 1119.8955 | 31  | D  | 20  | 2488.2952       |
| 3513.7731 | 1757.3902       | 1171.9292 | 32  | R  | 19  | 2373.2682       |
| 3676.8365 | 1838.9219       | 1226.2837 | 33  | Y  | 18  | 2217.1671       |
| 3775.9049 | 1888.4561       | 1259.3065 | 34  | V  | 17  | 2054.1038       |
| 3846.9420 | 1923.9746       | 1282.9855 | 35  | A  | 16  | 1955.0354       |
| 3960.0261 | 1980.5167       | 1320.6802 | 36  | I  | 15  | 1883.9983       |
| 4120.0567 | 2060.5320       | 1374.0238 | 37  | C  | 14  | 1770.9142       |
| 4248.1517 | 2124.5795       | 1416.7221 | 38  | K  | 13  | 1610.8835       |
| 4345.2044 | 2173.1059       | 1449.0730 | 39  | P  | 12  | 1482.7886       |
| 4458.2885 | 2229.6479       | 1486.7677 | 40  | L  | 11  | 1385.7358       |
| 4595.3474 | 2298.1773       | 1532.4540 | 41  | H  | 10  | 1272.6518       |
| 4758.4107 | 2379.7090       | 1586.8084 | 42  | Y  | 9   | 1135.5928       |
| 4871.4948 | 2436.2510       | 1624.5031 | 43  | L  | 8   | 972.5295        |
| 4972.5425 | 2486.7749       | 1658.1857 | 44  | T  | 7   | 859.4454        |
| 5085.6265 | 2543.3169       | 1695.8804 | 45  | I  | 6   | <b>758.3978</b> |
| 5216.6670 | 2608.8372       | 1739.5605 | 46  | M  | 5   | 645.3137        |
| 5330.7100 | 2665.8586       | 1777.5748 | 47  | N  | 4   | 514.2732        |
| 5427.7627 | 2714.3850       | 1809.9258 | 48  | P  | 3   | 400.2303        |
| 5555.8213 | 2778.4143       | 1852.6120 | 49  | Q  | 2   | 303.1775        |
|           |                 |           | 50  | R  | 1   | 175.1190        |

SRM transitions

| Transition ID                                             | Precursor m/z | Precursor charge | Fragment m/z | Relative intensity |
|-----------------------------------------------------------|---------------|------------------|--------------|--------------------|
| TISFGGcVVQIFFIHAVGGTEmVLLIAMAFDRYVAICPLHYLTIMNPQR.6.b17.2 | 955.828       | 6                | 938.993      | 100                |
| TISFGGcVVQIFFIHAVGGTEmVLLIAMAFDRYVAICPLHYLTIMNPQR.6.y6.1  | 955.828       | 6                | 758.398      | 1                  |
| TISFGGcVVQIFFIHAVGGTEmVLLIAMAFDRYVAICPLHYLTIMNPQR.6.b14.2 | 955.828       | 6                | 785.41       | 1                  |

### MS/MS spectrum

#### Ions:

- 1+  2+  3+  
 1+  2+  3+  
 1+  2+  3+  
 1+  2+  3+  
 1+  2+  3+  
 1+  2+  3+  
[\[Deselect All\]](#)

#### Neutral Loss:

- H<sub>2</sub>O (o)  
 NH<sub>3</sub> (\*)

#### Mass Type:

- Mono  Avg

Mass Tolerance: 0.05 Da

[Update](#)

#### Peak Assignment:

- Most Intense  
 Nearest Match

#### Peak Labels:

- Ion  m/z  
 None

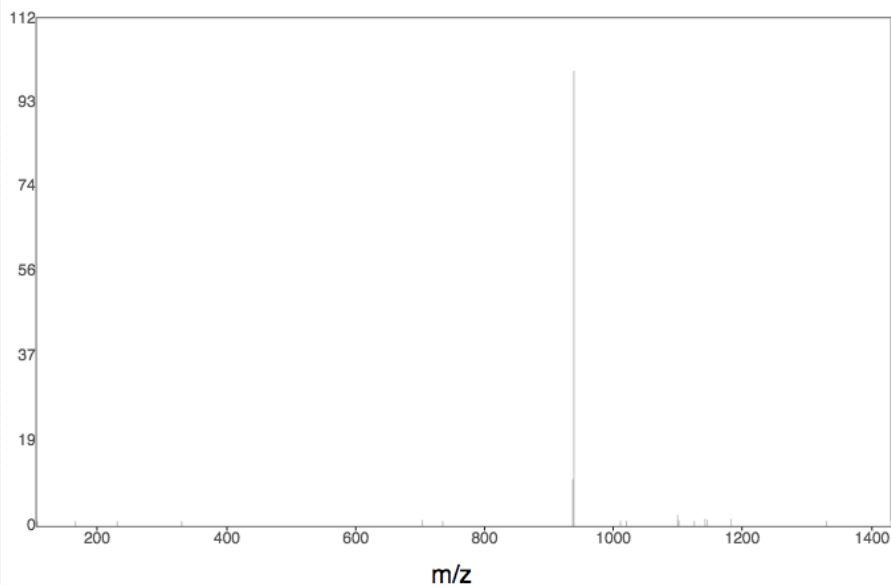

Click and drag in the plot to zoom X:  Y:  [Zoom Out](#) [Print](#)  Enable tooltip

| b+        | b2+       | b3+       | Seq     | y+        | y2+       | y3+       |
|-----------|-----------|-----------|---------|-----------|-----------|-----------|
| 100.0757  | 50.5415   | 34.0301   | 1 V 49  |           |           |           |
| 213.1598  | 107.0835  | 71.7248   | 2 I 48  | 5630.8506 | 2815.9290 | 1877.6217 |
| 300.1918  | 150.5995  | 100.7354  | 3 S 47  | 5517.7666 | 2759.3869 | 1839.9270 |
| 463.2551  | 232.1312  | 155.0899  | 4 Y 46  | 5430.7345 | 2715.8709 | 1810.9164 |
| 619.3562  | 310.1817  | 207.1236  | 5 R 45  | 5267.6712 | 2634.3392 | 1756.5619 |
| 676.3777  | 338.6925  | 226.1307  | 6 G 44  | 5111.5701 | 2556.2887 | 1704.5282 |
| 836.4083  | 418.7078  | 279.4743  | 7 C 43  | 5054.5486 | 2527.7780 | 1685.5211 |
| 949.4924  | 475.2498  | 317.1690  | 8 I 42  | 4894.5180 | 2447.7626 | 1632.1775 |
| 1050.5401 | 525.7737  | 350.8515  | 9 T 41  | 4781.4339 | 2391.2206 | 1594.4828 |
| 1178.5987 | 589.8030  | 393.5377  | 10 Q 40 | 4680.3863 | 2340.6968 | 1560.8003 |
| 1291.6827 | 646.3450  | 431.2324  | 11 L 39 | 4552.3277 | 2276.6675 | 1518.1141 |
| 1438.7511 | 719.8792  | 480.2552  | 12 F 38 | 4439.2436 | 2220.1254 | 1480.4194 |
| 1585.8195 | 793.4134  | 529.2780  | 13 F 37 | 4292.1752 | 2146.5912 | 1431.3966 |
| 1698.9036 | 849.9554  | 566.9727  | 14 L 36 | 4145.1068 | 2073.0570 | 1382.3738 |
| 1835.9625 | 918.4849  | 612.6590  | 15 H 35 | 4032.0227 | 2016.5150 | 1344.6791 |
| 1983.0309 | 992.0191  | 661.6818  | 16 F 34 | 3894.9638 | 1947.9855 | 1298.9928 |
| 2096.1150 | 1048.5611 | 699.3765  | 17 L 33 | 3747.8954 | 1874.4513 | 1249.9700 |
| 2153.1365 | 1077.0719 | 718.3837  | 18 G 32 | 3634.8113 | 1817.9093 | 1212.2753 |
| 2210.1579 | 1105.5826 | 737.3908  | 19 G 31 | 3577.7899 | 1789.3986 | 1193.2681 |
| 2267.1794 | 1134.0933 | 756.3980  | 20 G 30 | 3520.7684 | 1760.8878 | 1174.2610 |
| 2396.2220 | 1198.6146 | 799.4122  | 21 E 29 | 3463.7469 | 1732.3771 | 1155.2538 |
| 2453.2434 | 1227.1254 | 818.4193  | 22 G 28 | 3334.7043 | 1667.8558 | 1112.2396 |
| 2566.3275 | 1283.6674 | 856.1140  | 23 L 27 | 3277.6829 | 1639.3451 | 1093.2325 |
| 2679.4116 | 1340.2094 | 893.8087  | 24 L 26 | 3164.5988 | 1582.8030 | 1055.5378 |
| 2792.4956 | 1396.7515 | 931.5034  | 25 L 25 | 3051.5148 | 1526.2610 | 1017.8431 |
| 2891.5641 | 1446.2857 | 964.5262  | 26 V 24 | 2938.4307 | 1469.7190 | 980.1484  |
| 2990.6325 | 1495.8199 | 997.5490  | 27 V 23 | 2839.3623 | 1420.1848 | 947.1256  |
| 3137.6679 | 1569.3376 | 1046.5608 | 28 M 22 | 2740.2939 | 1370.6506 | 914.1028  |
| 3208.7050 | 1604.8561 | 1070.2398 | 29 A 21 | 2593.2585 | 1297.1329 | 865.0910  |
| 3355.7734 | 1678.3903 | 1119.2626 | 30 F 20 | 2522.2213 | 1261.6143 | 841.4120  |
| 3470.8003 | 1735.9038 | 1157.6050 | 31 D 19 | 2375.1529 | 1188.0801 | 792.3892  |
| 3626.9014 | 1813.9544 | 1209.6387 | 32 R 18 | 2260.1260 | 1130.5666 | 754.0468  |
| 3789.9648 | 1895.4860 | 1263.9931 | 33 Y 17 | 2104.0249 | 1052.5161 | 702.0131  |
| 3903.0488 | 1952.0281 | 1301.6878 | 34 I 16 | 1940.9616 | 970.9844  | 647.6587  |
| 3974.0860 | 1987.5466 | 1325.3668 | 35 A 15 | 1827.8775 | 914.4424  | 609.9640  |
| 4087.1700 | 2044.0886 | 1363.0615 | 36 I 14 | 1756.8404 | 878.9238  | 586.2850  |
| 4247.2007 | 2124.1040 | 1416.4051 | 37 C 13 | 1643.7563 | 822.3818  | 548.5903  |
| 4403.3018 | 2202.1545 | 1468.4388 | 38 R 12 | 1483.7257 | 742.3665  | 495.2467  |
| 4500.3545 | 2250.6809 | 1500.7897 | 39 P 11 | 1327.6246 | 664.3159  | 443.2130  |
| 4613.4386 | 2307.2229 | 1538.4844 | 40 L 10 | 1230.5718 | 615.7895  | 410.8621  |
| 4750.4975 | 2375.7524 | 1584.1707 | 41 H 9  | 1117.4877 | 559.2475  | 373.1674  |
| 4910.5282 | 2455.7677 | 1637.5142 | 42 C 8  | 980.4288  | 490.7180  | 327.4811  |
| 4997.5602 | 2499.2837 | 1666.5249 | 43 S 7  | 820.3982  | 410.7027  | 274.1376  |
| 5098.6079 | 2549.8076 | 1700.2075 | 44 T 6  | 733.3661  | 367.1867  | 245.1269  |
| 5197.6763 | 2599.3418 | 1733.2303 | 45 V 5  | 632.3185  | 316.6629  | 211.4443  |
| 5344.7117 | 2672.8595 | 1782.2421 | 46 M 4  | 533.2500  | 267.1287  | 178.4215  |
| 5458.7546 | 2729.8809 | 1820.2564 | 47 N 3  | 386.2146  | 193.6110  | 129.4097  |
| 5555.8074 | 2778.4073 | 1852.6073 | 48 P 2  | 272.1717  | 136.5895  | 91.3954   |
|           |           |           | 49 R 1  | 175.1190  | 88.0631   | 59.0445   |

### SRM transitions

| Transition ID | Precursor m/z | Precursor charge | Fragment m/z | Relative intensity |
|---------------|---------------|------------------|--------------|--------------------|
|---------------|---------------|------------------|--------------|--------------------|

### MS/MS spectrum

#### Ions:

- 1<sup>+</sup>  2<sup>+</sup>  3<sup>+</sup>  
 1<sup>+</sup>  2<sup>+</sup>  3<sup>+</sup>

[\[Deselect All\]](#)

#### Neutral Loss:

- H<sub>2</sub>O (o)  
 NH<sub>3</sub> (\*)

#### Mass Type:

- Mono  Avg

Mass Tolerance:  Da

#### Peak Assignment:

- Most Intense  
 Nearest Match

#### Peak Labels:

- Ion  m/z  
 None

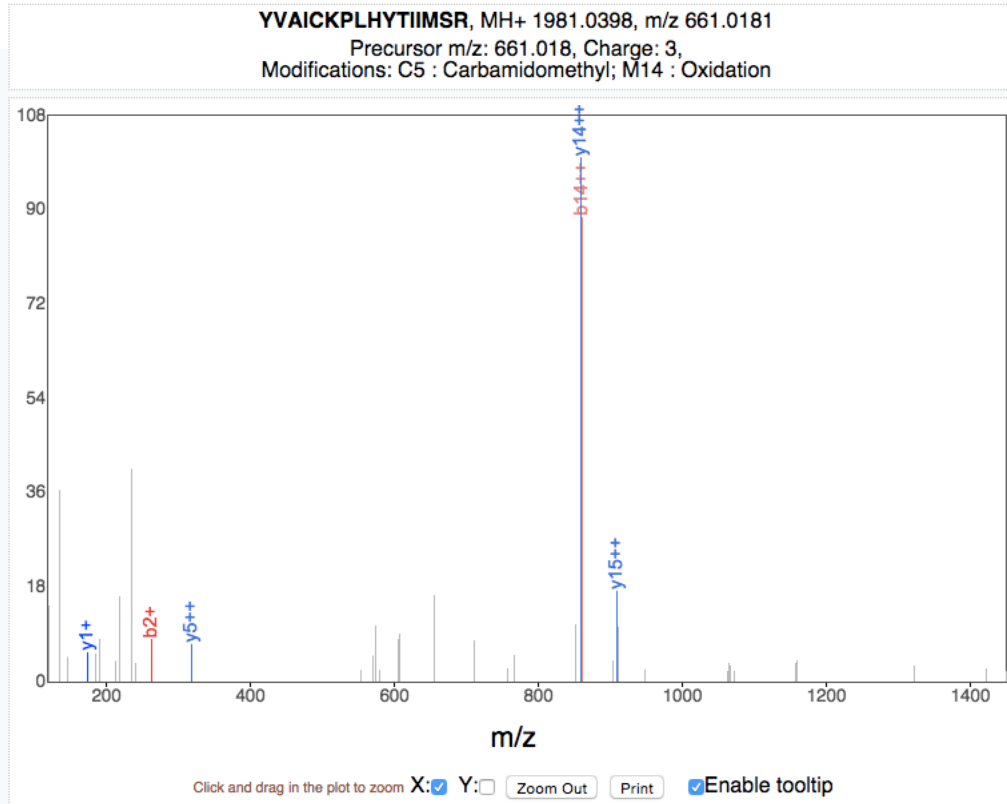

| b+              | b2+             | Seq    | y+              | y2+             |
|-----------------|-----------------|--------|-----------------|-----------------|
| 164.0706        | 82.5389         | 1 Y 16 |                 |                 |
| <b>263.1390</b> | 132.0731        | 2 V 15 | 1817.9765       | <b>909.4919</b> |
| 334.1761        | 167.5917        | 3 A 14 | 1718.9080       | <b>859.9577</b> |
| 447.2602        | 224.1337        | 4 I 13 | 1647.8709       | 824.4391        |
| 607.2908        | 304.1491        | 5 C 12 | 1534.7869       | 767.8971        |
| 735.3858        | 368.1965        | 6 K 11 | 1374.7562       | 687.8817        |
| 832.4386        | 416.7229        | 7 P 10 | 1246.6613       | 623.8343        |
| 945.5226        | 473.2650        | 8 L 9  | 1149.6085       | 575.3079        |
| 1082.5815       | 541.7944        | 9 H 8  | 1036.5244       | 518.7659        |
| 1245.6449       | 623.3261        | 10 Y 7 | 899.4655        | 450.2364        |
| 1346.6926       | 673.8499        | 11 T 6 | 736.4022        | 368.7047        |
| 1459.7766       | 730.3919        | 12 I 5 | 635.3545        | <b>318.1809</b> |
| 1572.8607       | 786.9340        | 13 I 4 | 522.2704        | 261.6389        |
| 1719.8961       | <b>860.4517</b> | 14 M 3 | 409.1864        | 205.0968        |
| 1806.9281       | 903.9677        | 15 S 2 | 262.1510        | 131.5791        |
|                 |                 | 16 R 1 | <b>175.1190</b> | 88.0631         |

### SRM transitions

| Transition ID            | Precursor m/z | Precursor charge | Fragment m/z | Relative intensity |
|--------------------------|---------------|------------------|--------------|--------------------|
| YVAIcKPLHYTIImSR.3.y14.2 | 661.018       | 3                | 859.958      | 100                |
| YVAIcKPLHYTIImSR.3.b14.2 | 661.018       | 3                | 860.452      | 88                 |
| YVAIcKPLHYTIImSR.3.y15.2 | 661.018       | 3                | 909.492      | 17                 |
| YVAIcKPLHYTIImSR.3.b2.1  | 661.018       | 3                | 263.139      | 8                  |
| YVAIcKPLHYTIImSR.3.y5.2  | 661.018       | 3                | 318.181      | 7                  |
| YVAIcKPLHYTIImSR.3.y1.1  | 661.018       | 3                | 175.119      | 5                  |

## MS/MS spectrum

### Ions:

- 1<sup>+</sup>  2<sup>+</sup>  3<sup>+</sup>  
 1<sup>+</sup>  2<sup>+</sup>  3<sup>+</sup>

[Deselect All]

### Neutral Loss:

- H<sub>2</sub>O (o)  
 NH<sub>3</sub> (\*)

### Mass Type:

- Mono  Avg

Mass Tolerance: 0.05 Da

Update

### Peak Assignment:

- Most Intense  
 Nearest Match

### Peak Labels:

- Ion  m/z  
 None

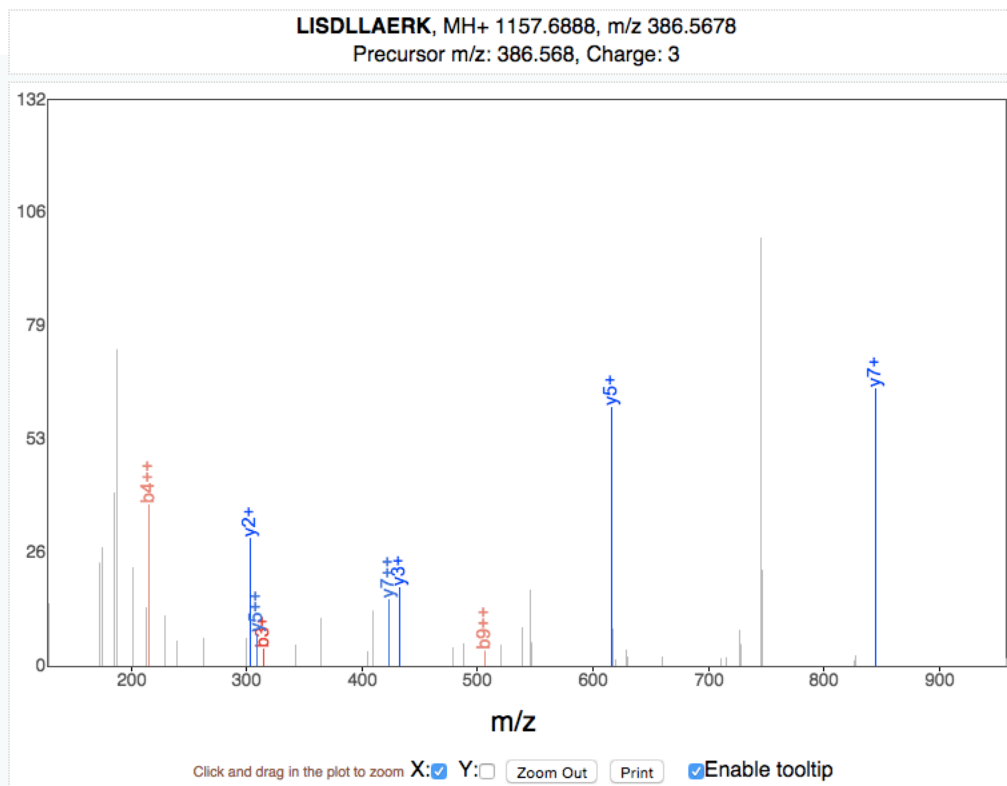

| b+              | b2+             | Seq    | y+              | y2+             |
|-----------------|-----------------|--------|-----------------|-----------------|
| 114.0913        | 57.5493         | 1 L 10 |                 |                 |
| 227.1754        | 114.0913        | 2 I 9  | 1044.6048       | 522.8060        |
| <b>314.2074</b> | 157.6074        | 3 S 8  | 931.5207        | 466.2640        |
| 429.2344        | <b>215.1208</b> | 4 D 7  | <b>844.4887</b> | <b>422.7480</b> |
| 542.3184        | 271.6629        | 5 L 6  | 729.4617        | 365.2345        |
| 655.4025        | 328.2049        | 6 L 5  | <b>616.3777</b> | <b>308.6925</b> |
| 726.4396        | 363.7234        | 7 A 4  | 503.2936        | 252.1504        |
| 855.4822        | 428.2447        | 8 E 3  | <b>432.2565</b> | 216.6319        |
| 1011.5833       | <b>506.2953</b> | 9 R 2  | <b>303.2139</b> | 152.1106        |
|                 |                 | 10 K 1 | 147.1128        | 74.0600         |

## SRM transitions

| Transition ID     | Precursor m/z | Precursor charge | Fragment m/z | Relative intensity |
|-------------------|---------------|------------------|--------------|--------------------|
| LISDLLAERK.3.y7.1 | 400.571       | 3                | 844.489      | 100                |
| LISDLLAERK.3.y5.1 | 400.571       | 3                | 616.378      | 93                 |
| LISDLLAERK.3.y2.1 | 400.571       | 3                | 303.214      | 45                 |
| LISDLLAERK.3.y3.1 | 400.571       | 3                | 432.257      | 28                 |
| LISDLLAERK.3.y7.2 | 400.571       | 3                | 422.748      | 23                 |
| LISDLLAERK.3.y5.2 | 400.571       | 3                | 308.692      | 11                 |

### MS/MS spectrum

#### Ions:

- 1<sup>+</sup>  2<sup>+</sup>  3<sup>+</sup>  
 1<sup>+</sup>  2<sup>+</sup>  3<sup>+</sup>

#### Neutral Loss:

- H<sub>2</sub>O (o)  
 NH<sub>3</sub> (\*)

#### Mass Type:

- Mono  Avg

Mass Tolerance: 0.05 Da

#### Peak Assignment:

- Most Intense  
 Nearest Match

#### Peak Labels:

- Ion  m/z  
 None

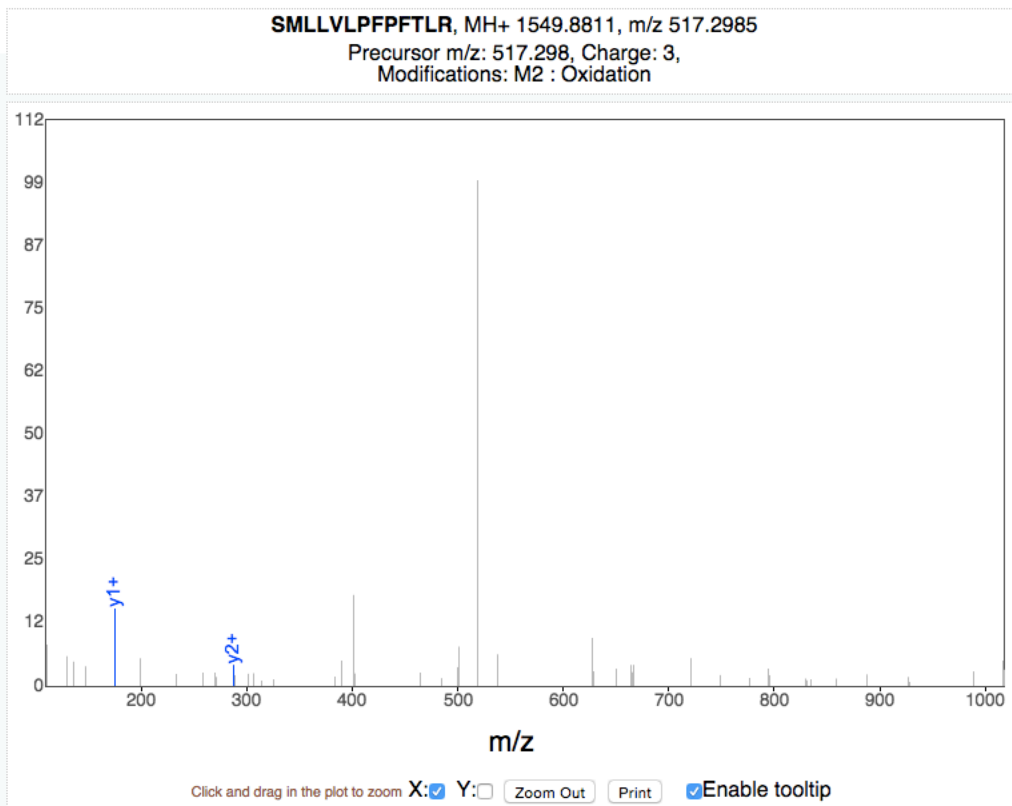

| b+        | b2+      | Seq    | y+              | y2+      |
|-----------|----------|--------|-----------------|----------|
| 88.0393   | 44.5233  | 1 S 13 |                 |          |
| 235.0747  | 118.0410 | 2 M 12 | 1462.8491       | 731.9282 |
| 348.1588  | 174.5830 | 3 L 11 | 1315.8137       | 658.4105 |
| 461.2428  | 231.1251 | 4 L 10 | 1202.7296       | 601.8684 |
| 560.3112  | 280.6593 | 5 V 9  | 1089.6455       | 545.3264 |
| 673.3953  | 337.2013 | 6 L 8  | 990.5771        | 495.7922 |
| 770.4481  | 385.7277 | 7 P 7  | 877.4930        | 439.2502 |
| 917.5165  | 459.2619 | 8 F 6  | 780.4403        | 390.7238 |
| 1014.5693 | 507.7883 | 9 P 5  | 633.3719        | 317.1896 |
| 1161.6377 | 581.3225 | 10 F 4 | 536.3191        | 268.6632 |
| 1262.6853 | 631.8463 | 11 T 3 | 389.2507        | 195.1290 |
| 1375.7694 | 688.3883 | 12 L 2 | <b>288.2030</b> | 144.6051 |
|           |          | 13 R 1 | <b>175.1190</b> | 88.0631  |

### SRM transitions

| Transition ID        | Precursor m/z | Precursor charge | Fragment m/z | Relative intensity |
|----------------------|---------------|------------------|--------------|--------------------|
| SmLLVLPFPFTLR.3.y1.1 | 517.299       | 3                | 175.119      | 100                |
| SmLLVLPFPFTLR.3.y2.1 | 517.299       | 3                | 288.203      | 26                 |

## MS/MS spectrum

### Ions:

a  1+  2+  3+

b  1+  2+  3+

c  1+  2+  3+

x  1+  2+  3+

y  1+  2+  3+

z  1+  2+  3+

[\[Deselect All\]](#)

### Neutral Loss:

H<sub>2</sub>O (o)

NH<sub>3</sub> (\*)

Mass Type:

Mono  Avg

Mass Tolerance:  Da

Peak Assignment:

Most Intense

Nearest Match

Peak Labels:

Ion  m/z

None

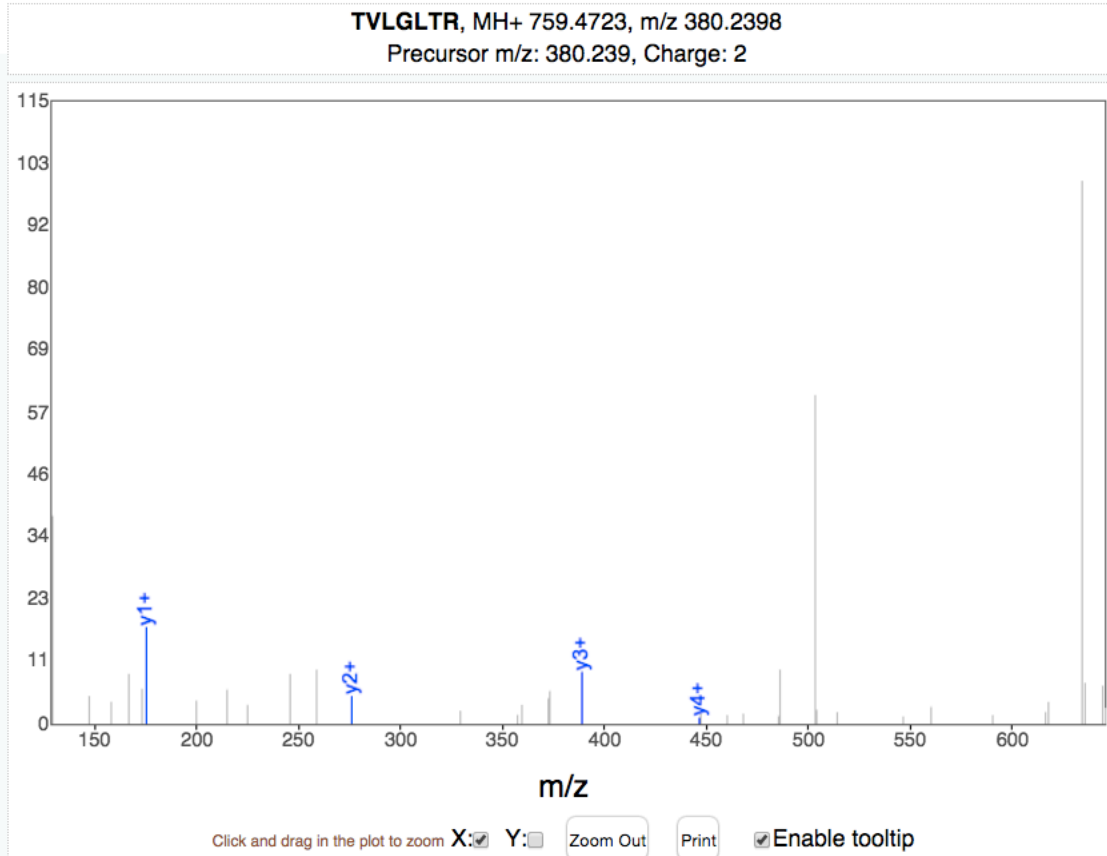

| b+       | Seq   | y+                       |
|----------|-------|--------------------------|
| 102.0550 | 1 T 7 |                          |
| 201.1234 | 2 V 6 | 658.4246                 |
| 314.2074 | 3 L 5 | 559.3562                 |
| 371.2289 | 4 G 4 | <a href="#">446.2722</a> |
| 484.3130 | 5 L 3 | <a href="#">389.2507</a> |
| 585.3606 | 6 T 2 | <a href="#">276.1666</a> |
|          | 7 R 1 | <a href="#">175.1190</a> |

## SRM transitions

| Transition ID  | Precursor m/z | Precursor charge | Fragment m/z | Relative intensity |
|----------------|---------------|------------------|--------------|--------------------|
| TVLGLTR.2.y1.1 | 401.245       | 2                | 175.119      | 100                |
| TVLGLTR.2.y3.1 | 401.245       | 2                | 389.251      | 53                 |
| TVLGLTR.2.y2.1 | 401.245       | 2                | 276.167      | 28                 |
| TVLGLTR.2.y4.1 | 401.245       | 2                | 446.272      | 6                  |

### MS/MS spectrum

**Ions:**

a  1+  2+  3+

b  1+  2+  3+

c  1+  2+  3+

x  1+  2+  3+

y  1+  2+  3+

z  1+  2+  3+

[\[Deselect All\]](#)

**Neutral Loss:**

H<sub>2</sub>O (o)

NH<sub>3</sub> (\*)

**Mass Type:**

Mono  Avg

Mass Tolerance:  Da

[Update](#)

**Peak Assignment:**

Most Intense

Nearest Match

**Peak Labels:**

Ion  m/z

None

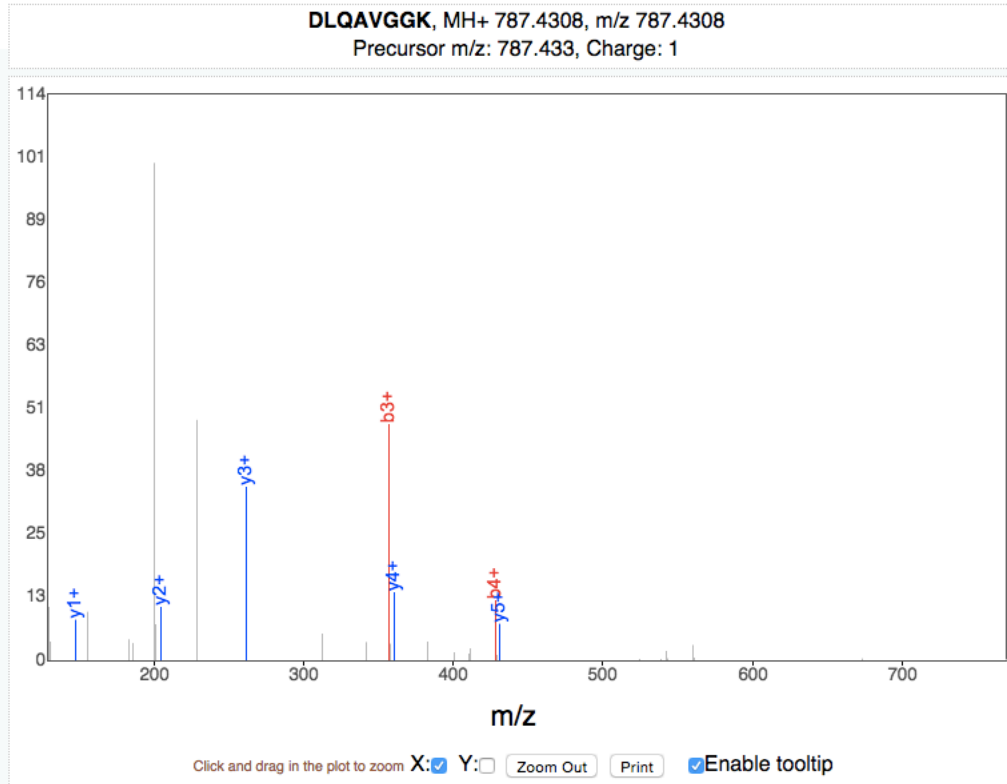

| b+              | Seq   | y+       |
|-----------------|-------|----------|
| 116.0342        | 1 D 8 |          |
| 229.1183        | 2 L 7 | 672.4039 |
| <b>357.1769</b> | 3 Q 6 | 559.3198 |
| <b>428.2140</b> | 4 A 5 | 431.2613 |
| 527.2824        | 5 V 4 | 360.2241 |
| 584.3039        | 6 G 3 | 261.1557 |
| 641.3253        | 7 G 2 | 204.1343 |
|                 | 8 K 1 | 147.1128 |

### SRM transitions

| Transition ID   | Precursor m/z | Precursor charge | Fragment m/z | Relative intensity |
|-----------------|---------------|------------------|--------------|--------------------|
| DLQAVGGK.1.b3.2 | 829.441       | 1                | 200.097      | 100                |
| DLQAVGGK.1.y3.1 | 829.441       | 1                | 261.156      | 34                 |
| DLQAVGGK.1.y4.1 | 829.441       | 1                | 360.224      | 13                 |
| DLQAVGGK.1.y2.1 | 829.441       | 1                | 204.134      | 10                 |
| DLQAVGGK.1.y1.1 | 829.441       | 1                | 147.113      | 8                  |
| DLQAVGGK.1.y5.1 | 829.441       | 1                | 431.261      | 7                  |
| DLQAVGGK.1.b7.2 | 829.441       | 1                | 342.172      | 3                  |

## MS/MS spectrum

### Ions:

a  1+  2+  3+

b  1+  2+  3+

c  1+  2+  3+

x  1+  2+  3+

y  1+  2+  3+

z  1+  2+  3+

[\[Deselect All\]](#)

### Neutral Loss:

H<sub>2</sub>O (o)

NH<sub>3</sub> (\*)

### Mass Type:

Mono  Avg

Mass Tolerance:  Da

### Peak Assignment:

Most Intense

Nearest Match

### Peak Labels:

Ion  m/z

None

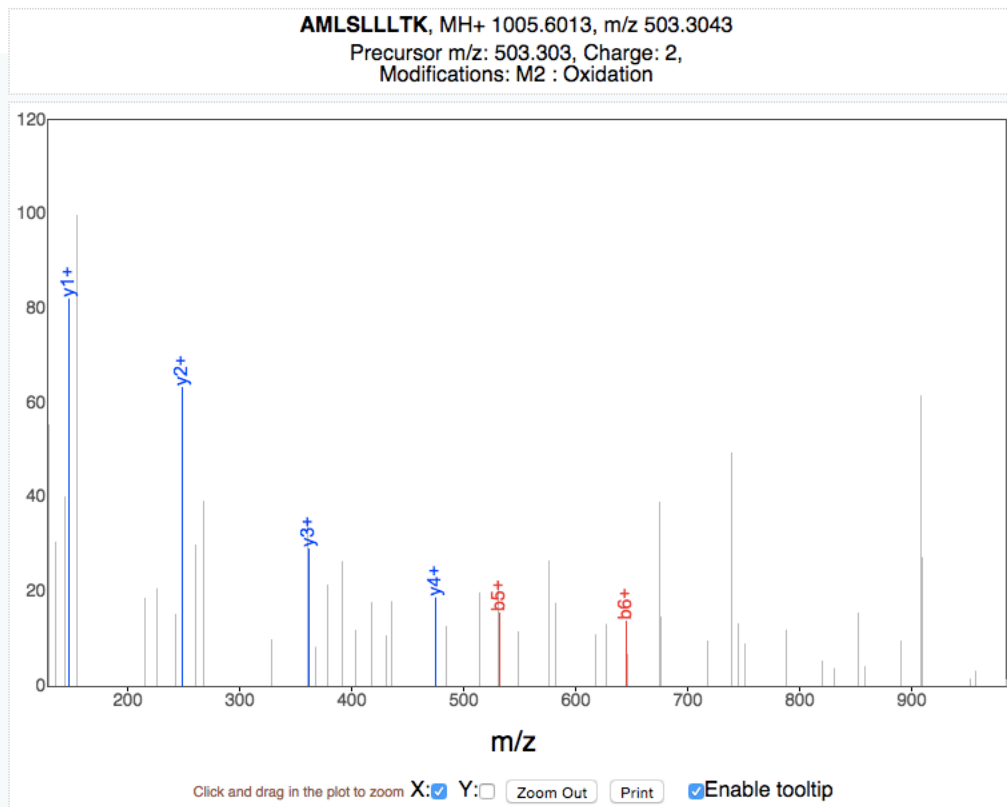

| b+       | Seq   | y+       |
|----------|-------|----------|
| 72.0444  | 1 A 9 |          |
| 219.0798 | 2 M 8 | 934.5642 |
| 332.1639 | 3 L 7 | 787.5288 |
| 419.1959 | 4 S 6 | 674.4447 |
| 532.2799 | 5 L 5 | 587.4127 |
| 645.3640 | 6 L 4 | 474.3286 |
| 758.4481 | 7 L 3 | 361.2445 |
| 859.4958 | 8 T 2 | 248.1605 |
|          | 9 K 1 | 147.1128 |

## SRM transitions

| Transition ID   | Precursor m/z | Precursor charge | Fragment m/z | Relative intensity |
|-----------------|---------------|------------------|--------------|--------------------|
| AmLSLLTK.2.y1.1 | 503.304       | 2                | 147.113      | 100                |
| AmLSLLTK.2.y2.1 | 503.304       | 2                | 248.16       | 77                 |
| AmLSLLTK.2.y3.1 | 503.304       | 2                | 361.245      | 35                 |
| AmLSLLTK.2.y4.1 | 503.304       | 2                | 474.329      | 22                 |
| AmLSLLTK.2.b5.1 | 503.304       | 2                | 532.28       | 18                 |
| AmLSLLTK.2.b6.1 | 503.304       | 2                | 645.364      | 16                 |



## MS/MS spectrum

### Ions:

- 1<sup>+</sup>  2<sup>+</sup>  3<sup>+</sup>  
 1<sup>+</sup>  2<sup>+</sup>  3<sup>+</sup>

[Deselect All](#)

### Neutral Loss:

- H<sub>2</sub>O (o)  
 NH<sub>3</sub> (\*)

### Mass Type:

- Mono  Avg

Mass Tolerance:  Da

[Update](#)

### Peak Assignment:

- Most Intense  
 Nearest Match

### Peak Labels:

- Ion  m/z  
 None

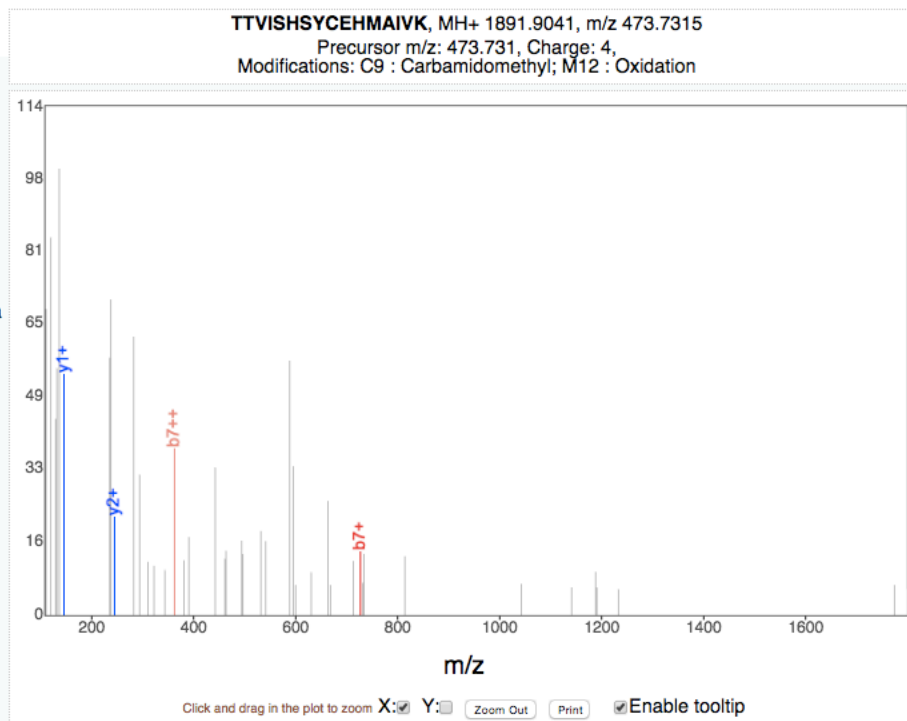

| b+              | b2+             | b3+      | Seq  | y+ | y2+             | y3+               |
|-----------------|-----------------|----------|------|----|-----------------|-------------------|
| 102.0550        | 51.5311         | 34.6898  | 1 T  | 16 |                 |                   |
| 203.1026        | 102.0550        | 68.3724  | 2 T  | 15 | 1790.8564       | 895.9318 597.6237 |
| 302.1710        | 151.5892        | 101.3952 | 3 V  | 14 | 1689.8087       | 845.4080 563.9411 |
| 415.2551        | 208.1312        | 139.0899 | 4 I  | 13 | 1590.7403       | 795.8738 530.9183 |
| 502.2871        | 251.6472        | 168.1006 | 5 S  | 12 | 1477.6562       | 739.3318 493.2236 |
| 639.3461        | 320.1767        | 213.7869 | 6 H  | 11 | 1390.6242       | 695.8157 464.2129 |
| <b>726.3781</b> | <b>363.6927</b> | 242.7975 | 7 S  | 10 | 1253.5653       | 627.2863 418.5266 |
| 889.4414        | 445.2243        | 297.1520 | 8 Y  | 9  | 1166.5333       | 583.7703 389.5159 |
| 1049.4721       | 525.2397        | 350.4955 | 9 C  | 8  | 1003.4699       | 502.2386 335.1615 |
| 1178.5146       | 589.7610        | 393.5097 | 10 E | 7  | 843.4393        | 422.2233 281.8180 |
| 1315.5736       | 658.2904        | 439.1960 | 11 H | 6  | 714.3967        | 357.7020 238.8038 |
| 1462.6090       | 731.8081        | 488.2078 | 12 M | 5  | 577.3378        | 289.1725 193.1174 |
| 1533.6461       | 767.3267        | 511.8869 | 13 A | 4  | 430.3024        | 215.6548 144.1056 |
| 1646.7301       | 823.8687        | 549.5816 | 14 I | 3  | 359.2653        | 180.1363 120.4266 |
| 1745.7986       | 873.4029        | 582.6044 | 15 V | 2  | <b>246.1812</b> | 123.5942 82.7319  |
|                 |                 |          | 16 K | 1  | <b>147.1128</b> | 74.0600 49.7091   |

## SRM transitions

| Transition ID           | Precursor m/z | Precursor charge | Fragment m/z | Relative intensity |
|-------------------------|---------------|------------------|--------------|--------------------|
| TTVISHSYcEHmAIVK.4.y1.1 | 473.732       | 4                | 147.113      | 100                |
| TTVISHSYcEHmAIVK.4.b7.2 | 473.732       | 4                | 363.693      | 69                 |
| TTVISHSYcEHmAIVK.4.y2.1 | 473.732       | 4                | 246.181      | 40                 |
| TTVISHSYcEHmAIVK.4.b7.1 | 473.732       | 4                | 726.378      | 26                 |

## MS/MS spectrum

### Ions:

a  1+  2+  3+

b  1+  2+  3+

c  1+  2+  3+

x  1+  2+  3+

y  1+  2+  3+

z  1+  2+  3+

[\[Deselect All\]](#)

### Neutral Loss:

H<sub>2</sub>O (o)

NH<sub>3</sub> (\*)

Mass Type:

Mono  Avg

Mass Tolerance:  Da

Peak Assignment:

Most Intense

Nearest Match

Peak Labels:

Ion  m/z

None

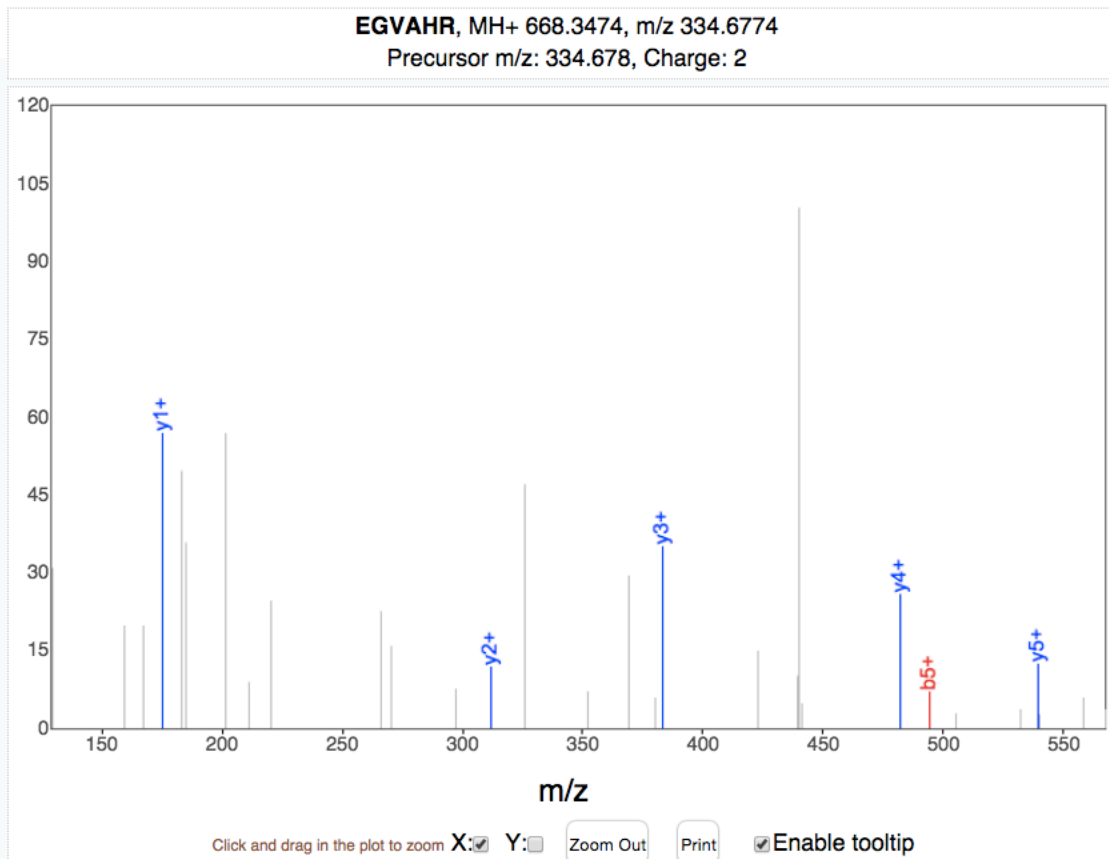

| b+              | Seq   | y+              |
|-----------------|-------|-----------------|
| 130.0499        | 1 E 6 |                 |
| 187.0713        | 2 G 5 | 539.3049        |
| 286.1397        | 3 V 4 | 482.2834        |
| 357.1769        | 4 A 3 | 383.2150        |
| <b>494.2358</b> | 5 H 2 | <b>312.1779</b> |
| 6 R 1           |       | 175.1190        |

## SRM transitions

Transition ID

Precursor m/z

Precursor charge

Fragment m/z

Relative intensity

## MS/MS spectrum

### Ions:

a  1+  2+  3+

b  1+  2+  3+

c  1+  2+  3+

x  1+  2+  3+

y  1+  2+  3+

z  1+  2+  3+

[\[Deselect All\]](#)

### Neutral Loss:

H<sub>2</sub>O (o)

NH<sub>3</sub> (\*)

Mass Type:

Mono  Avg

Mass Tolerance:  Da

Peak Assignment:

Most Intense

Nearest Match

Peak Labels:

Ion  m/z

None

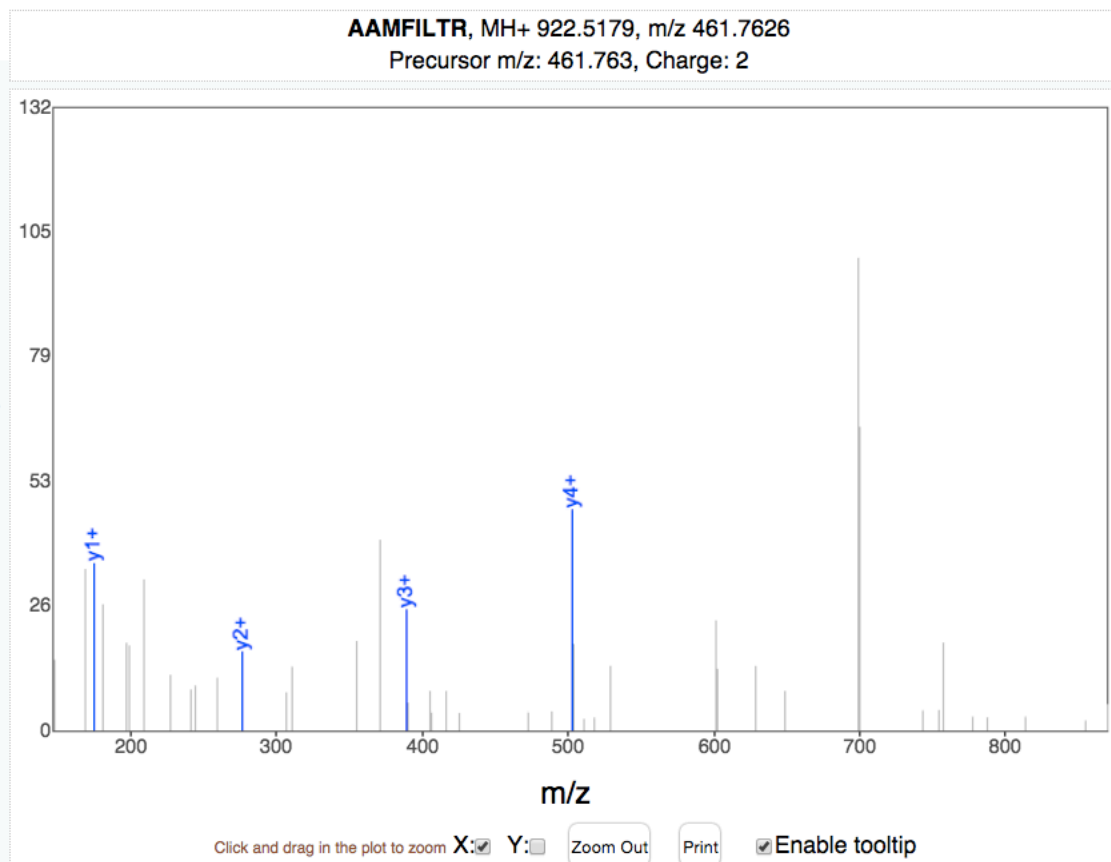

| b+       | Seq   | y+                       |
|----------|-------|--------------------------|
| 72.0444  | 1 A 8 |                          |
| 143.0815 | 2 A 7 | 851.4808                 |
| 274.1220 | 3 M 6 | 780.4437                 |
| 421.1904 | 4 F 5 | 649.4032                 |
| 534.2745 | 5 I 4 | <a href="#">502.3348</a> |
| 647.3585 | 6 L 3 | <a href="#">389.2507</a> |
| 748.4062 | 7 T 2 | <a href="#">276.1666</a> |
| 8 R 1    |       | <a href="#">175.1190</a> |

## SRM transitions

| Transition ID   | Precursor m/z | Precursor charge | Fragment m/z | Relative intensity |
|-----------------|---------------|------------------|--------------|--------------------|
| AAMFILTR.2.y4.1 | 482.768       | 2                | 502.335      | 100                |
| AAMFILTR.2.y1.1 | 482.768       | 2                | 175.119      | 75                 |
| AAMFILTR.2.y3.1 | 482.768       | 2                | 389.251      | 54                 |
| AAMFILTR.2.y2.1 | 482.768       | 2                | 276.167      | 35                 |

### MS/MS spectrum

#### Ions:

- 1+  2+  3+  
 1+  2+  3+  
 1+  2+  3+  
 1+  2+  3+  
 1+  2+  3+  
 1+  2+  3+

[\[Deselect All\]](#)

#### Neutral Loss:

- H<sub>2</sub>O (o)  
 NH<sub>3</sub> (\*)

#### Mass Type:

- Mono  Avg

Mass Tolerance: 0.05 Da

[Update](#)

#### Peak Assignment:

- Most Intense  
 Nearest Match

#### Peak Labels:

- Ion  m/z  
 None

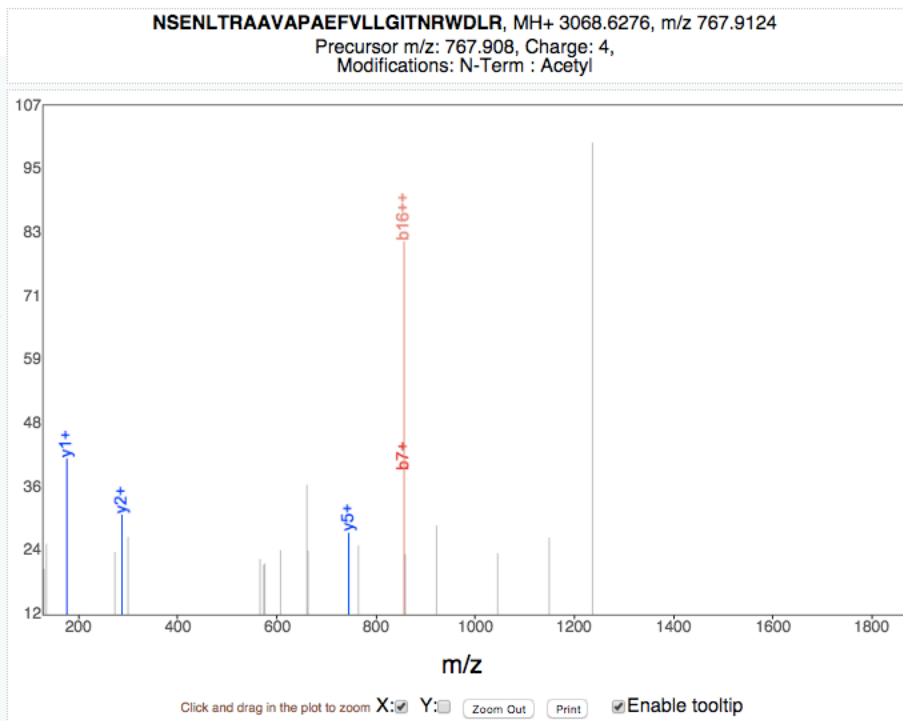

| b+        | b2+       | b3+      | Seq     | y+        | y2+       | y3+      |
|-----------|-----------|----------|---------|-----------|-----------|----------|
| 157.0608  | 79.0340   | 53.0251  | 1 N 27  |           |           |          |
| 244.0928  | 122.5500  | 82.0358  | 2 S 26  | 2912.5741 | 1456.7907 | 971.5296 |
| 373.1354  | 187.0713  | 125.0500 | 3 E 25  | 2825.5421 | 1413.2747 | 942.5189 |
| 487.1783  | 244.0928  | 163.0643 | 4 N 24  | 2696.4995 | 1348.7534 | 899.5047 |
| 600.2624  | 300.6348  | 200.7590 | 5 L 23  | 2582.4566 | 1291.7319 | 861.4904 |
| 701.3101  | 351.1587  | 234.4415 | 6 T 22  | 2469.3725 | 1235.1899 | 823.7957 |
| 857.4112  | 429.2092  | 286.4752 | 7 R 21  | 2368.3248 | 1184.6660 | 790.1131 |
| 928.4483  | 464.7278  | 310.1543 | 8 A 20  | 2212.2237 | 1106.6155 | 738.0794 |
| 999.4854  | 500.2463  | 333.8333 | 9 A 19  | 2141.1866 | 1071.0969 | 714.4004 |
| 1098.5538 | 549.7805  | 366.8561 | 10 V 18 | 2070.1495 | 1035.5784 | 690.7213 |
| 1169.5909 | 585.2991  | 390.5352 | 11 A 17 | 1971.0811 | 986.0442  | 657.6985 |
| 1266.6437 | 633.8255  | 422.8861 | 12 P 16 | 1900.0439 | 950.5256  | 634.0195 |
| 1337.6808 | 669.3440  | 446.5651 | 13 A 15 | 1802.9912 | 901.9992  | 601.6686 |
| 1466.7234 | 733.8653  | 489.5793 | 14 E 14 | 1731.9541 | 866.4807  | 577.9895 |
| 1613.7918 | 807.3995  | 538.6021 | 15 F 13 | 1602.9115 | 801.9594  | 534.9753 |
| 1712.8602 | 856.9338  | 571.6249 | 16 V 12 | 1455.8431 | 728.4252  | 485.9525 |
| 1825.9443 | 913.4758  | 609.3196 | 17 L 11 | 1356.7746 | 678.8910  | 452.9297 |
| 1939.0284 | 970.0178  | 647.0143 | 18 L 10 | 1243.6906 | 622.3489  | 415.2350 |
| 1996.0498 | 998.5285  | 666.0215 | 19 G 9  | 1130.6065 | 565.8069  | 377.5404 |
| 2109.1339 | 1055.0706 | 703.7161 | 20 I 8  | 1073.5851 | 537.2962  | 358.5332 |
| 2210.1816 | 1105.5944 | 737.3987 | 21 T 7  | 960.5010  | 480.7541  | 320.8385 |
| 2324.2245 | 1162.6159 | 775.4130 | 22 N 6  | 859.4533  | 430.2303  | 287.1560 |
| 2480.3256 | 1240.6664 | 827.4467 | 23 R 5  | 745.4104  | 373.2088  | 249.1416 |
| 2666.4049 | 1333.7061 | 889.4732 | 24 W 4  | 589.3093  | 295.1583  | 197.1079 |
| 2781.4319 | 1391.2196 | 927.8155 | 25 D 3  | 403.2300  | 202.1186  | 135.0815 |
| 2894.5159 | 1447.7616 | 965.5102 | 26 L 2  | 288.2030  | 144.6051  | 96.7392  |
|           |           |          | 27 R 1  | 175.1190  | 88.0631   | 59.0445  |

### SRM transitions

| Transition ID                       | Precursor m/z | Precursor charge | Fragment m/z | Relative intensity |
|-------------------------------------|---------------|------------------|--------------|--------------------|
| nSENLTRAAVAPAEFVLLGITNRWDLR.4.b16.2 | 767.912       | 4                | 856.934      | 100                |
| nSENLTRAAVAPAEFVLLGITNRWDLR.4.y1.1  | 767.912       | 4                | 175.119      | 50                 |
| nSENLTRAAVAPAEFVLLGITNRWDLR.4.b7.1  | 767.912       | 4                | 857.411      | 47                 |
| nSENLTRAAVAPAEFVLLGITNRWDLR.4.y2.1  | 767.912       | 4                | 288.203      | 37                 |
| nSENLTRAAVAPAEFVLLGITNRWDLR.4.y5.1  | 767.912       | 4                | 745.41       | 33                 |

## MS/MS spectrum

### Ions:

- 1<sup>+</sup>  2<sup>+</sup>  3<sup>+</sup>  
 1<sup>+</sup>  2<sup>+</sup>  3<sup>+</sup>

[\[Deselect All\]](#)

### Neutral Loss:

- H<sub>2</sub>O (o)  
 NH<sub>3</sub> (\*)

### Mass Type:

- Mono  Avg

Mass Tolerance: 0.05 Da

[Update](#)

### Peak Assignment:

- Most Intense  
 Nearest Match

### Peak Labels:

- Ion  m/z  
 None

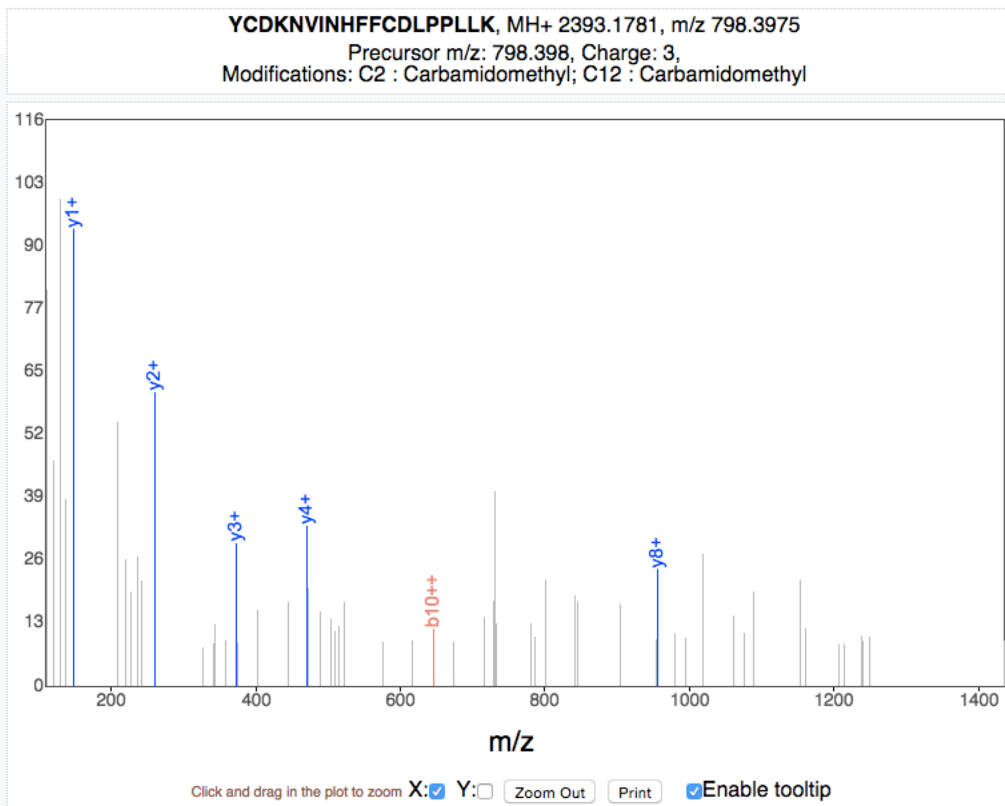

| b+        | b2+             | Seq     | y+              | y2+       |
|-----------|-----------------|---------|-----------------|-----------|
| 164.0706  | 82.5389         | 1 Y 19  |                 |           |
| 324.1013  | 162.5543        | 2 C 18  | 2230.1147       | 1115.5617 |
| 439.1282  | 220.0677        | 3 D 17  | 2070.0841       | 1035.5457 |
| 567.2232  | 284.1152        | 4 K 16  | 1955.0572       | 978.0322  |
| 681.2661  | 341.1367        | 5 N 15  | 1826.9622       | 913.9847  |
| 780.3345  | 390.6709        | 6 V 14  | 1712.9193       | 856.9633  |
| 893.4186  | 447.2129        | 7 I 13  | 1613.8508       | 807.4291  |
| 1007.4615 | 504.2344        | 8 N 12  | 1500.7668       | 750.8870  |
| 1144.5204 | 572.7638        | 9 H 11  | 1386.7239       | 693.8656  |
| 1291.5888 | <b>646.2980</b> | 10 F 10 | 1249.6649       | 625.3361  |
| 1438.6572 | 719.8323        | 11 F 9  | 1102.5965       | 551.8019  |
| 1598.6879 | 799.8476        | 12 C 8  | <b>955.5281</b> | 478.2677  |
| 1713.7148 | 857.3610        | 13 D 7  | 795.4975        | 398.2524  |
| 1826.7989 | 913.9031        | 14 L 6  | 680.4705        | 340.7389  |
| 1923.8517 | 962.4295        | 15 P 5  | 567.3865        | 284.1969  |
| 2020.9044 | 1010.9558       | 16 P 4  | <b>470.3337</b> | 235.6705  |
| 2133.9885 | 1067.4979       | 17 L 3  | <b>373.2809</b> | 187.1441  |
| 2247.0725 | 1124.0399       | 18 L 2  | <b>260.1969</b> | 130.6021  |
|           |                 | 19 K 1  | <b>147.1128</b> | 74.0600   |

## SRM transitions

| Transition ID               | Precursor m/z | Precursor charge | Fragment m/z | Relative intensity |
|-----------------------------|---------------|------------------|--------------|--------------------|
| YcDKNVINHFFcDLPPLLK.3.y1.1  | 798.398       | 3                | 147.113      | 100                |
| YcDKNVINHFFcDLPPLLK.3.y2.1  | 798.398       | 3                | 260.197      | 64                 |
| YcDKNVINHFFcDLPPLLK.3.y4.1  | 798.398       | 3                | 470.334      | 35                 |
| YcDKNVINHFFcDLPPLLK.3.y3.1  | 798.398       | 3                | 373.281      | 31                 |
| YcDKNVINHFFcDLPPLLK.3.y8.1  | 798.398       | 3                | 955.528      | 25                 |
| YcDKNVINHFFcDLPPLLK.3.b10.2 | 798.398       | 3                | 646.298      | 12                 |

## MS/MS spectrum

### Ions:

a  1+  2+  3+

b  1+  2+  3+

c  1+  2+  3+

x  1+  2+  3+

y  1+  2+  3+

z  1+  2+  3+

[Deselect All](#)

### Neutral Loss:

H<sub>2</sub>O (o)

NH<sub>3</sub> (\*)

Mass Type:

Mono  Avg

Mass Tolerance: 0.05 Da

[Update](#)

Peak Assignment:

Most Intense

Nearest Match

Peak Labels:

Ion  m/z

None

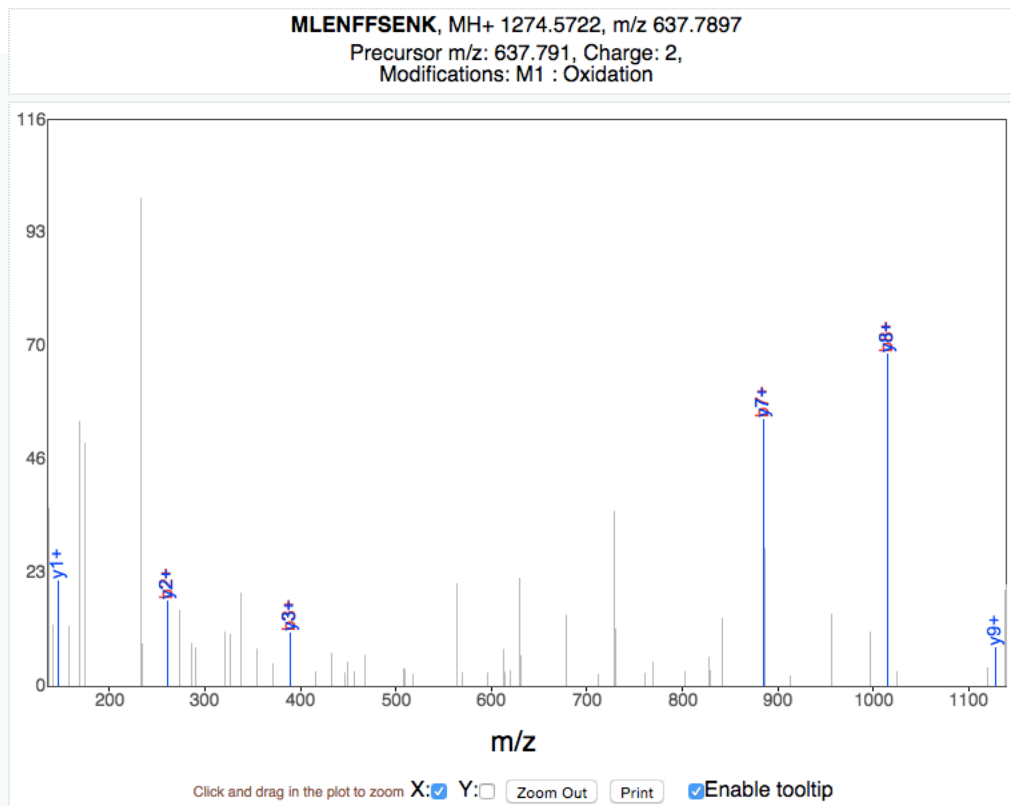

| b+               | Seq    | y+               |
|------------------|--------|------------------|
| 148.0427         | 1 M 10 |                  |
| <b>261.1267</b>  | 2 L 9  | <b>1127.5368</b> |
| <b>390.1693</b>  | 3 E 8  | <b>1014.4527</b> |
| 504.2123         | 4 N 7  | <b>885.4101</b>  |
| 651.2807         | 5 F 6  | 771.3672         |
| 798.3491         | 6 F 5  | 624.2988         |
| <b>885.3811</b>  | 7 S 4  | 477.2304         |
| <b>1014.4237</b> | 8 E 3  | <b>390.1983</b>  |
| 1128.4666        | 9 N 2  | <b>261.1557</b>  |
|                  | 10 K 1 | <b>147.1128</b>  |

## SRM transitions

| Transition ID     | Precursor m/z | Precursor charge | Fragment m/z | Relative intensity |
|-------------------|---------------|------------------|--------------|--------------------|
| mLENFFSENK.2.b8.1 | 637.79        | 2                | 1014.42      | 100                |
| mLENFFSENK.2.y8.1 | 637.79        | 2                | 1014.45      | 100                |
| mLENFFSENK.2.b7.1 | 637.79        | 2                | 885.381      | 80                 |
| mLENFFSENK.2.y7.1 | 637.79        | 2                | 885.41       | 80                 |
| mLENFFSENK.2.y1.1 | 637.79        | 2                | 147.113      | 31                 |
| mLENFFSENK.2.b2.1 | 637.79        | 2                | 261.127      | 25                 |
| mLENFFSENK.2.y2.1 | 637.79        | 2                | 261.156      | 25                 |

## MS/MS spectrum

### Ions:

a  1+  2+  3+

b  1+  2+  3+

c  1+  2+  3+

x  1+  2+  3+

y  1+  2+  3+

z  1+  2+  3+

[\[Deselect All\]](#)

### Neutral Loss:

H<sub>2</sub>O (o)

NH<sub>3</sub> (\*)

### Mass Type:

Mono  Avg

Mass Tolerance:  Da

### Peak Assignment:

Most Intense

Nearest Match

### Peak Labels:

Ion  m/z

None

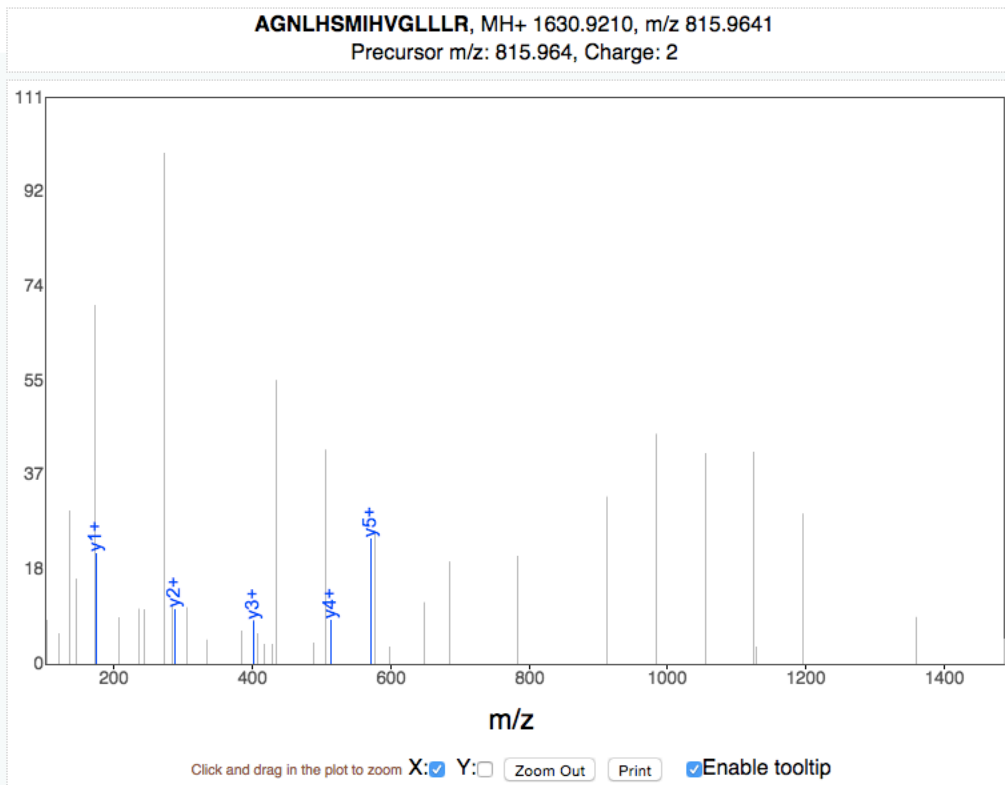

| b+        | Seq    | y+        |
|-----------|--------|-----------|
| 72.0444   | 1 A 15 |           |
| 129.0659  | 2 G 14 | 1559.8839 |
| 243.1088  | 3 N 13 | 1502.8624 |
| 356.1928  | 4 L 12 | 1388.8195 |
| 493.2518  | 5 H 11 | 1275.7354 |
| 580.2838  | 6 S 10 | 1138.6765 |
| 711.3243  | 7 M 9  | 1051.6445 |
| 824.4083  | 8 I 8  | 920.6040  |
| 961.4672  | 9 H 7  | 807.5199  |
| 1060.5357 | 10 V 6 | 670.4610  |
| 1117.5571 | 11 G 5 | 571.3926  |
| 1230.6412 | 12 L 4 | 514.3711  |
| 1343.7253 | 13 L 3 | 401.2871  |
| 1456.8093 | 14 L 2 | 288.2030  |
|           | 15 R 1 | 175.1190  |

## SRM transitions

| Transition ID          | Precursor m/z | Precursor charge | Fragment m/z | Relative intensity |
|------------------------|---------------|------------------|--------------|--------------------|
| AGNLHSMIHVGLLLR.2.y5.1 | 836.969       | 2                | 571.393      | 100                |
| AGNLHSMIHVGLLLR.2.y1.1 | 836.969       | 2                | 175.119      | 88                 |
| AGNLHSMIHVGLLLR.2.y2.1 | 836.969       | 2                | 288.203      | 43                 |
| AGNLHSMIHVGLLLR.2.y4.1 | 836.969       | 2                | 514.371      | 34                 |
| AGNLHSMIHVGLLLR.2.y3.1 | 836.969       | 2                | 401.287      | 34                 |

## MS/MS spectrum

### Ions:

a  1+  2+  3+

b  1+  2+  3+

c  1+  2+  3+

x  1+  2+  3+

y  1+  2+  3+

z  1+  2+  3+

[Deselect All](#)

### Neutral Loss:

H<sub>2</sub>O (o)

NH<sub>3</sub> (\*)

### Mass Type:

Mono  Avg

Mass Tolerance: 0.05 Da

[Update](#)

### Peak Assignment:

Most Intense

Nearest Match

### Peak Labels:

Ion  m/z

None

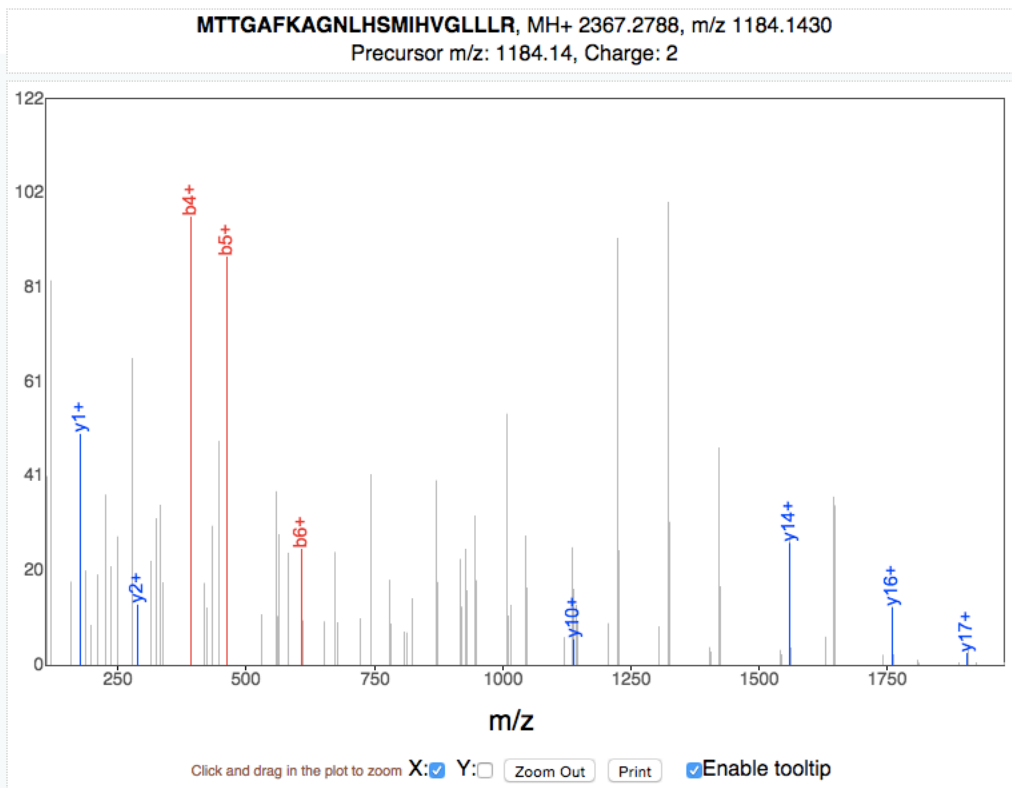

| b+        | Seq               | y+ |
|-----------|-------------------|----|
| 132.0478  | 1 M 22            |    |
| 233.0954  | 2 T 21 2236.2383  |    |
| 334.1431  | 3 T 20 2135.1906  |    |
| 391.1646  | 4 G 19 2034.1429  |    |
| 462.2017  | 5 A 18 1977.1215  |    |
| 609.2701  | 6 F 17 1906.0844  |    |
| 737.3651  | 7 K 16 1759.0160  |    |
| 808.4022  | 8 A 15 1630.9210  |    |
| 865.4236  | 9 G 14 1559.8839  |    |
| 979.4666  | 10 N 13 1502.8624 |    |
| 1092.5506 | 11 L 12 1388.8195 |    |
| 1229.6096 | 12 H 11 1275.7354 |    |
| 1316.6416 | 13 S 10 1138.6765 |    |
| 1447.6821 | 14 M 9 1051.6445  |    |
| 1560.7661 | 15 I 8 920.6040   |    |
| 1697.8250 | 16 H 7 807.5199   |    |
| 1796.8935 | 17 V 6 670.4610   |    |
| 1853.9149 | 18 G 5 571.3926   |    |
| 1966.9990 | 19 L 4 514.3711   |    |
| 2080.0830 | 20 L 3 401.2871   |    |
| 2193.1671 | 21 L 2 288.2030   |    |
|           | 22 R 1 175.1190   |    |

## SRM transitions

| Transition ID                  | Precursor m/z | Precursor charge | Fragment m/z | Relative intensity |
|--------------------------------|---------------|------------------|--------------|--------------------|
| MTTGAFKAGNLHSMIHVGLLLR.2.y1.1  | 1205.15       | 2                | 175.119      | 100                |
| MTTGAFKAGNLHSMIHVGLLLR.2.y14.1 | 1205.15       | 2                | 1559.88      | 52                 |
| MTTGAFKAGNLHSMIHVGLLLR.2.y14.2 | 1205.15       | 2                | 780.446      | 35                 |
| MTTGAFKAGNLHSMIHVGLLLR.2.y2.1  | 1205.15       | 2                | 288.203      | 26                 |
| MTTGAFKAGNLHSMIHVGLLLR.2.y16.1 | 1205.15       | 2                | 1759.02      | 24                 |
| MTTGAFKAGNLHSMIHVGLLLR.2.b6.1  | 1205.15       | 2                | 651.281      | 18                 |
| MTTGAFKAGNLHSMIHVGLLLR.2.y10.1 | 1205.15       | 2                | 1138.68      | 11                 |



MS/MS spectrum

Ions:

- a  1+  2+  3+
- b  1+  2+  3+
- c  1+  2+  3+
- x  1+  2+  3+
- y  1+  2+  3+
- z  1+  2+  3+

[Deselect All](#)

Neutral Loss:

- H<sub>2</sub>O (o)
- NH<sub>3</sub> (\*)

Mass Type:

- Mono  Avg

Mass Tolerance: 0.05 Da

[Update](#)

Peak Assignment:

- Most Intense
- Nearest Match

Peak Labels:

- Ion  m/z
- None

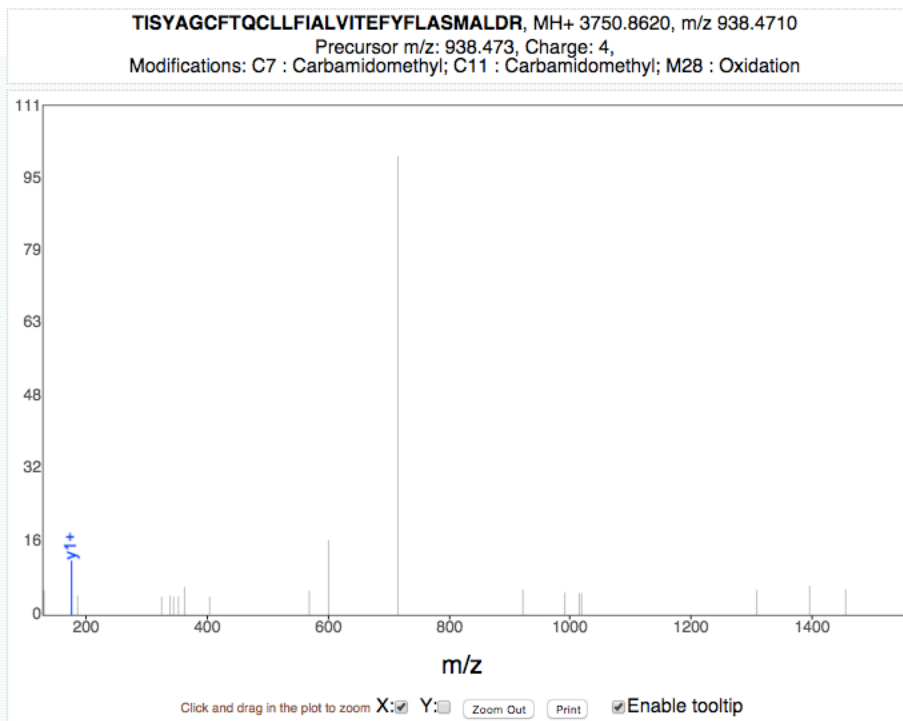

| b+        | b2+       | b3+       | Seq     | y+              | y2+       | y3+       |
|-----------|-----------|-----------|---------|-----------------|-----------|-----------|
| 102.0550  | 51.5311   | 34.6898   | 1 T 32  |                 |           |           |
| 215.1390  | 108.0731  | 72.3845   | 2 I 31  | 3649.8143       | 1825.4108 | 1217.2763 |
| 302.1710  | 151.5892  | 101.3952  | 3 S 30  | 3536.7303       | 1768.8688 | 1179.5816 |
| 465.2344  | 233.1208  | 155.7496  | 4 Y 29  | 3449.6982       | 1725.3528 | 1150.5709 |
| 536.2715  | 268.6394  | 179.4287  | 5 A 28  | 3286.6349       | 1643.8211 | 1096.2165 |
| 593.2930  | 297.1501  | 198.4358  | 6 G 27  | 3215.5978       | 1608.3025 | 1072.5375 |
| 753.3236  | 377.1654  | 251.7794  | 7 C 26  | 3158.5763       | 1579.7918 | 1053.5303 |
| 900.3920  | 450.6996  | 300.8022  | 8 F 25  | 2998.5457       | 1499.7765 | 1000.1867 |
| 1001.4397 | 501.2235  | 334.4847  | 9 T 24  | 2851.4773       | 1426.2423 | 951.1639  |
| 1129.4983 | 565.2528  | 377.1709  | 10 Q 23 | 2750.4296       | 1375.7184 | 917.4814  |
| 1289.5289 | 645.2681  | 430.5145  | 11 C 22 | 2622.3710       | 1311.6891 | 874.7952  |
| 1402.6130 | 701.8101  | 468.2092  | 12 L 21 | 2462.3404       | 1231.6738 | 821.4516  |
| 1515.6970 | 758.3522  | 505.9039  | 13 L 20 | 2349.2563       | 1175.1318 | 783.7570  |
| 1662.7655 | 831.8864  | 554.9267  | 14 F 19 | 2236.1722       | 1118.5898 | 746.0623  |
| 1775.8495 | 888.4284  | 592.6214  | 15 I 18 | 2089.1038       | 1045.0556 | 697.0395  |
| 1846.8866 | 923.9470  | 616.3004  | 16 A 17 | 1976.0198       | 988.5135  | 659.3448  |
| 1959.9707 | 980.4890  | 653.9951  | 17 L 16 | 1904.9826       | 952.9950  | 635.6657  |
| 2059.0391 | 1030.0232 | 687.0179  | 18 V 15 | 1791.8986       | 896.4529  | 597.9710  |
| 2172.1232 | 1086.5652 | 724.7126  | 19 I 14 | 1692.8302       | 846.9187  | 564.9482  |
| 2273.1709 | 1137.0891 | 758.3951  | 20 T 13 | 1579.7461       | 790.3767  | 527.2536  |
| 2402.2135 | 1201.6104 | 801.4093  | 21 E 12 | 1478.6984       | 739.8529  | 493.5710  |
| 2549.2819 | 1275.1446 | 850.4321  | 22 F 11 | 1349.6558       | 675.3316  | 450.5568  |
| 2712.3452 | 1356.6762 | 904.7866  | 23 Y 10 | 1202.5874       | 601.7973  | 401.5340  |
| 2859.4136 | 1430.2104 | 953.8094  | 24 F 9  | 1039.5241       | 520.2657  | 347.1795  |
| 2972.4977 | 1486.7525 | 991.5041  | 25 L 8  | 892.4557        | 446.7315  | 298.1567  |
| 3043.5348 | 1522.2710 | 1015.1831 | 26 A 7  | 779.3716        | 390.1894  | 260.4621  |
| 3130.5668 | 1565.7870 | 1044.1938 | 27 S 6  | 708.3345        | 354.6709  | 236.7830  |
| 3277.6022 | 1639.3047 | 1093.2056 | 28 M 5  | 621.3025        | 311.1549  | 207.7723  |
| 3348.6393 | 1674.8233 | 1116.8846 | 29 A 4  | 474.2671        | 237.6372  | 158.7605  |
| 3461.7234 | 1731.3653 | 1154.5793 | 30 L 3  | 403.2300        | 202.1186  | 135.0815  |
| 3576.7503 | 1788.8788 | 1192.9216 | 31 D 2  | 290.1459        | 145.5766  | 97.3868   |
|           |           |           | 32 R 1  | <b>175.1190</b> | 88.0631   | 59.0445   |

SRM transitions

| Transition ID                           | Precursor m/z | Precursor charge | Fragment m/z | Relative intensity |
|-----------------------------------------|---------------|------------------|--------------|--------------------|
| TISYAGcFTQcLLFIAlVITEFYFLASmALDR.4.y1.1 | 938.471       | 4                | 175.119      | 100                |

MS/MS spectrum

- Ions:
- a  1+  2+  3+
  - b  1+  2+  3+
  - c  1+  2+  3+
  - x  1+  2+  3+
  - y  1+  2+  3+
  - z  1+  2+  3+

- Neutral Loss:
- H<sub>2</sub>O (o)
  - NH<sub>3</sub> (\*)
- Mass Type:
- Mono  Avg

Mass Tolerance: 0.05 Da

- Update
- Peak Assignment:
- Most Intense
  - Nearest Match
- Peak Labels:
- Ion m/z
  - None

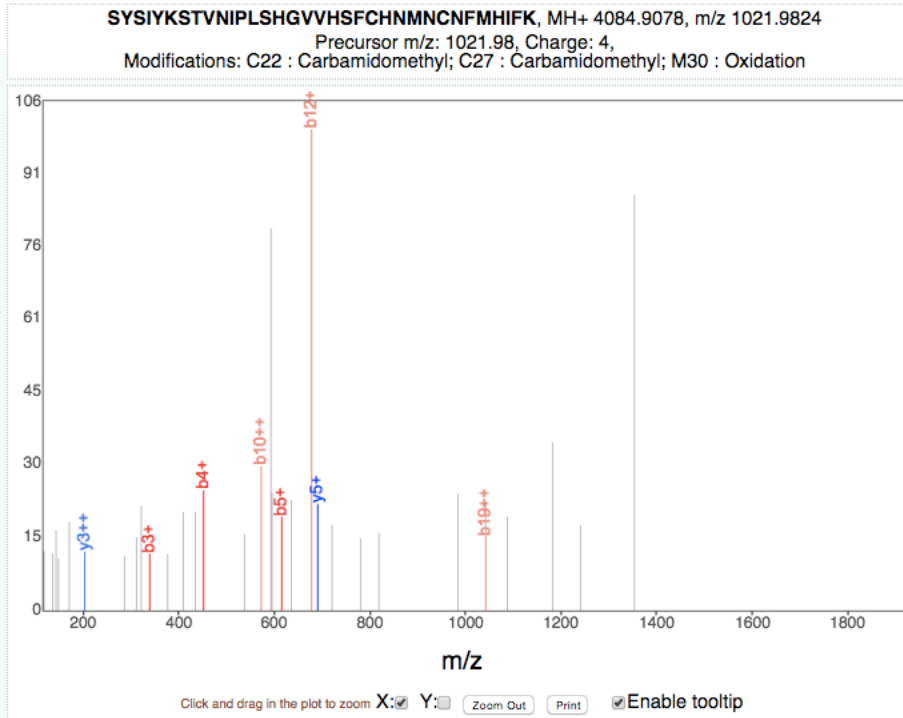

| b+              | b2+              | b3+       | Seq     | y+              | y2+             | y3+       |
|-----------------|------------------|-----------|---------|-----------------|-----------------|-----------|
| 88.0393         | 44.5233          | 30.0180   | 1 S 34  |                 |                 |           |
| 251.1026        | 126.0550         | 84.3724   | 2 Y 33  | 3997.8757       | 1999.4415       | 1333.2968 |
| <b>338.1347</b> | 169.5710         | 113.3831  | 3 S 32  | 3834.8124       | 1917.9098       | 1278.9423 |
| <b>451.2187</b> | 226.1130         | 151.0778  | 4 I 31  | 3747.7804       | 1874.3938       | 1249.9316 |
| <b>614.2821</b> | 307.6447         | 205.4322  | 5 Y 30  | 3634.6963       | 1817.8518       | 1212.2370 |
| 742.3770        | 371.6921         | 248.1305  | 6 K 29  | 3471.6330       | 1736.3201       | 1157.8825 |
| 829.4090        | 415.2082         | 277.1412  | 7 S 28  | 3343.5380       | 1672.2726       | 1115.1842 |
| 930.4567        | 465.7320         | 310.8238  | 8 T 27  | 3256.5060       | 1628.7566       | 1086.1735 |
| 1029.5251       | 515.2662         | 343.8466  | 9 V 26  | 3155.4583       | 1578.2328       | 1052.4910 |
| 1143.5681       | <b>572.2877</b>  | 381.8609  | 10 N 25 | 3056.3899       | 1528.6986       | 1019.4681 |
| 1256.6521       | 628.8297         | 419.5556  | 11 I 24 | 2942.3470       | 1471.6771       | 981.4538  |
| 1353.7049       | <b>677.3561</b>  | 451.9065  | 12 P 23 | 2829.2629       | 1415.1351       | 943.7591  |
| 1466.7890       | 733.8981         | 489.6012  | 13 L 22 | 2732.2101       | 1366.6087       | 911.4082  |
| 1553.8210       | 777.4141         | 518.6118  | 14 S 21 | 2619.1261       | 1310.0667       | 873.7135  |
| 1690.8799       | 845.9436         | 564.2981  | 15 H 20 | 2532.0940       | 1266.5507       | 844.7029  |
| 1747.9014       | 874.4543         | 583.3053  | 16 G 19 | 2395.0351       | 1198.0212       | 799.0166  |
| 1846.9698       | 923.9885         | 616.3281  | 17 V 18 | 2338.0137       | 1169.5105       | 780.0094  |
| 1946.0382       | 973.5227         | 649.3509  | 18 V 17 | 2238.9453       | 1119.9763       | 746.9866  |
| 2083.0971       | <b>1042.0522</b> | 695.0372  | 19 H 16 | 2139.8768       | 1070.4421       | 713.9638  |
| 2170.1291       | 1085.5682        | 724.0479  | 20 S 15 | 2002.8179       | 1001.9126       | 668.2775  |
| 2317.1975       | 1159.1024        | 773.0707  | 21 F 14 | 1915.7859       | 958.3966        | 639.2668  |
| 2477.2282       | 1239.1177        | 826.4142  | 22 C 13 | 1768.7175       | 884.8624        | 590.2440  |
| 2614.2871       | 1307.6472        | 872.1006  | 23 H 12 | 1608.6868       | 804.8471        | 536.9005  |
| 2728.3300       | 1364.6687        | 910.1149  | 24 N 11 | 1471.6279       | 736.3176        | 491.2142  |
| 2859.3705       | 1430.1889        | 953.7950  | 25 M 10 | 1357.5850       | 679.2961        | 453.1998  |
| 2973.4134       | 1487.2104        | 991.8093  | 26 N 9  | 1226.5445       | 613.7759        | 409.5197  |
| 3133.4441       | 1567.2257        | 1045.1529 | 27 C 8  | 1112.5016       | 556.7544        | 371.5054  |
| 3247.4870       | 1624.2471        | 1083.1672 | 28 N 7  | 952.4709        | 476.7391        | 318.1618  |
| 3394.5554       | 1697.7814        | 1132.1900 | 29 F 6  | 838.4280        | 419.7176        | 280.1475  |
| 3541.5908       | 1771.2991        | 1181.2018 | 30 M 5  | <b>691.3596</b> | 346.1834        | 231.1247  |
| 3678.6497       | 1839.8285        | 1226.8881 | 31 H 4  | 544.3242        | 272.6657        | 182.1129  |
| 3791.7338       | 1896.3705        | 1264.5828 | 32 I 3  | 407.2653        | <b>204.1363</b> | 136.4266  |
| 3938.8022       | 1969.9047        | 1313.6056 | 33 F 2  | 294.1812        | 147.5942        | 98.7319   |
|                 |                  |           | 34 K 1  | 147.1128        | 74.0600         | 49.7091   |

SRM transitions

| Transition ID                              | Precursor m/z | Precursor charge | Fragment m/z | Relative intensity |
|--------------------------------------------|---------------|------------------|--------------|--------------------|
| SYSIYKSTVNIPLSHGVVHSFCHNMNcNFmHIFK.4.b12.2 | 1021.98       | 4                | 677.356      | 100                |
| SYSIYKSTVNIPLSHGVVHSFCHNMNcNFmHIFK.4.b10.2 | 1021.98       | 4                | 572.288      | 29                 |
| SYSIYKSTVNIPLSHGVVHSFCHNMNcNFmHIFK.4.b4.1  | 1021.98       | 4                | 451.219      | 24                 |
| SYSIYKSTVNIPLSHGVVHSFCHNMNcNFmHIFK.4.y5.1  | 1021.98       | 4                | 691.36       | 22                 |
| SYSIYKSTVNIPLSHGVVHSFCHNMNcNFmHIFK.4.b5.1  | 1021.98       | 4                | 614.282      | 19                 |
| SYSIYKSTVNIPLSHGVVHSFCHNMNcNFmHIFK.4.b19.2 | 1021.98       | 4                | 1042.05      | 15                 |
| SYSIYKSTVNIPLSHGVVHSFCHNMNcNFmHIFK.4.y3.2  | 1021.98       | 4                | 204.136      | 12                 |

## MS/MS spectrum

### Ions:

a  1+  2+  3+

b  1+  2+  3+

c  1+  2+  3+

x  1+  2+  3+

y  1+  2+  3+

z  1+  2+  3+

[\[Deselect All\]](#)

### Neutral Loss:

H<sub>2</sub>O (o)

NH<sub>3</sub> (\*)

### Mass Type:

Mono  Avg

Mass Tolerance:  Da

### Peak Assignment:

Most Intense

Nearest Match

### Peak Labels:

Ion  m/z

None

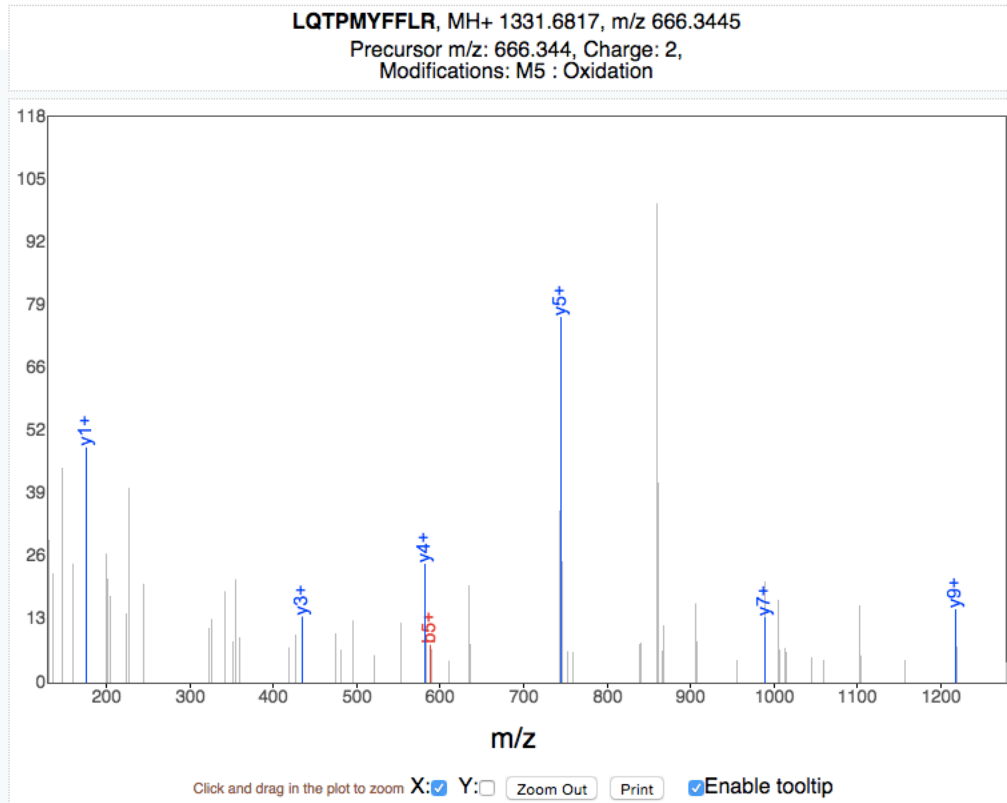

| b+        | Seq    | y+        |
|-----------|--------|-----------|
| 114.0913  | 1 L 10 |           |
| 242.1499  | 2 Q 9  | 1218.5976 |
| 343.1976  | 3 T 8  | 1090.5390 |
| 440.2504  | 4 P 7  | 989.4913  |
| 587.2858  | 5 M 6  | 892.4386  |
| 750.3491  | 6 Y 5  | 745.4032  |
| 897.4175  | 7 F 4  | 582.3398  |
| 1044.4859 | 8 F 3  | 435.2714  |
| 1157.5700 | 9 L 2  | 288.2030  |
|           | 10 R 1 | 175.1190  |

## SRM transitions

| Transition ID     | Precursor m/z | Precursor charge | Fragment m/z | Relative intensity |
|-------------------|---------------|------------------|--------------|--------------------|
| LQTPmYFFLR.2.y5.1 | 666.344       | 2                | 745.403      | 100                |
| LQTPmYFFLR.2.y1.1 | 666.344       | 2                | 175.119      | 64                 |
| LQTPmYFFLR.2.y4.1 | 666.344       | 2                | 582.34       | 32                 |
| LQTPmYFFLR.2.y9.1 | 666.344       | 2                | 1218.6       | 19                 |
| LQTPmYFFLR.2.y3.1 | 666.344       | 2                | 435.271      | 17                 |
| LQTPmYFFLR.2.y7.1 | 666.344       | 2                | 989.491      | 17                 |
| LQTPmYFFLR.2.b5.1 | 666.344       | 2                | 587.286      | 10                 |

## MS/MS spectrum

### Ions:

- 1<sup>+</sup>  2<sup>+</sup>  3<sup>+</sup>  
 1<sup>+</sup>  2<sup>+</sup>  3<sup>+</sup>

[\[Deselect All\]](#)

### Neutral Loss:

- H<sub>2</sub>O (o)  
 NH<sub>3</sub> (\*)

### Mass Type:

- Mono  Avg

Mass Tolerance:  Da

[Update](#)

### Peak Assignment:

- Most Intense  
 Nearest Match

### Peak Labels:

- Ion  m/z  
 None

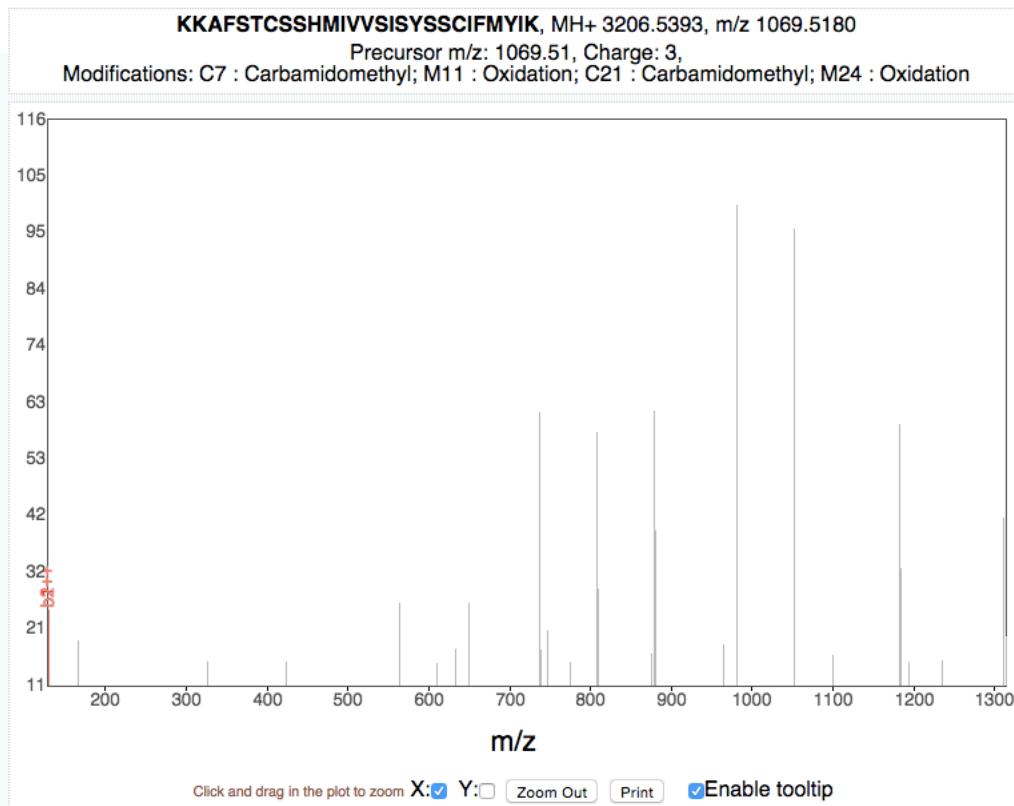

| b+              | b2+             | Seq     | y+        | y2+       |
|-----------------|-----------------|---------|-----------|-----------|
| <b>129.1022</b> | 65.0548         | 1 K 27  |           |           |
| 257.1972        | <b>129.1022</b> | 2 K 26  | 3078.4443 | 1539.7258 |
| 328.2343        | 164.6208        | 3 A 25  | 2950.3494 | 1475.6783 |
| 475.3027        | 238.1550        | 4 F 24  | 2879.3123 | 1440.1598 |
| 562.3348        | 281.6710        | 5 S 23  | 2732.2438 | 1366.6256 |
| 663.3824        | 332.1949        | 6 T 22  | 2645.2118 | 1323.1095 |
| 823.4131        | 412.2102        | 7 C 21  | 2544.1641 | 1272.5857 |
| 910.4451        | 455.7262        | 8 S 20  | 2384.1335 | 1192.5704 |
| 997.4771        | 499.2422        | 9 S 19  | 2297.1015 | 1149.0544 |
| 1134.5361       | 567.7717        | 10 H 18 | 2210.0694 | 1105.5384 |
| 1281.5715       | 641.2894        | 11 M 17 | 2073.0105 | 1037.0089 |
| 1394.6555       | 697.8314        | 12 I 16 | 1925.9751 | 963.4912  |
| 1493.7239       | 747.3656        | 13 V 15 | 1812.8911 | 906.9492  |
| 1592.7923       | 796.8998        | 14 V 14 | 1713.8226 | 857.4150  |
| 1679.8244       | 840.4158        | 15 S 13 | 1614.7542 | 807.8808  |
| 1792.9084       | 896.9579        | 16 I 12 | 1527.7222 | 764.3647  |
| 1879.9405       | 940.4739        | 17 S 11 | 1414.6381 | 707.8227  |
| 2043.0038       | 1022.0055       | 18 Y 10 | 1327.6061 | 664.3067  |
| 2130.0358       | 1065.5215       | 19 S 9  | 1164.5428 | 582.7750  |
| 2217.0679       | 1109.0376       | 20 S 8  | 1077.5108 | 539.2590  |
| 2377.0985       | 1189.0529       | 21 C 7  | 990.4787  | 495.7430  |
| 2490.1826       | 1245.5949       | 22 I 6  | 830.4481  | 415.7277  |
| 2637.2510       | 1319.1291       | 23 F 5  | 717.3640  | 359.1856  |
| 2784.2864       | 1392.6468       | 24 M 4  | 570.2956  | 285.6514  |
| 2947.3497       | 1474.1785       | 25 Y 3  | 423.2602  | 212.1337  |
| 3060.4338       | 1530.7205       | 26 I 2  | 260.1969  | 130.6021  |
|                 |                 | 27 K 1  | 147.1128  | 74.0600   |

## SRM transitions

| Transition ID                      | Precursor m/z | Precursor charge | Fragment m/z | Relative intensity |
|------------------------------------|---------------|------------------|--------------|--------------------|
| KKAFSTcSSHmIVVSISYSScIFmYIK.3.b1.1 | 1069.52       | 3                | 129.102      | 100                |
| KKAFSTcSSHmIVVSISYSScIFmYIK.3.b2.2 | 1069.52       | 3                | 129.102      | 100                |

## MS/MS spectrum

### Ions:

a  1+  2+  3+

b  1+  2+  3+

c  1+  2+  3+

x  1+  2+  3+

y  1+  2+  3+

z  1+  2+  3+

[\[Deselect All\]](#)

### Neutral Loss:

H<sub>2</sub>O (o)

NH<sub>3</sub> (\*)

### Mass Type:

Mono  Avg

Mass Tolerance:  Da

### Peak Assignment:

Most Intense

Nearest Match

### Peak Labels:

Ion  m/z

None

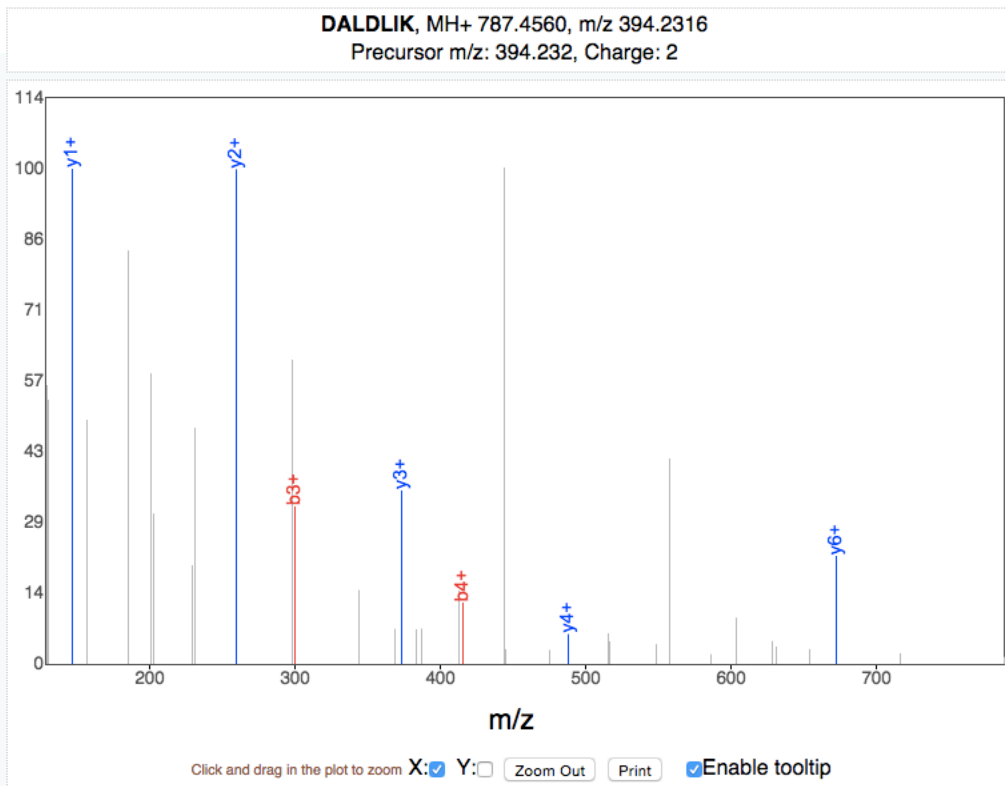

| b+       | Seq   | y+       |
|----------|-------|----------|
| 116.0342 | 1 D 7 |          |
| 187.0713 | 2 A 6 | 672.4291 |
| 300.1554 | 3 L 5 | 601.3919 |
| 415.1823 | 4 D 4 | 488.3079 |
| 528.2664 | 5 L 3 | 373.2809 |
| 641.3505 | 6 I 2 | 260.1969 |
|          | 7 K 1 | 147.1128 |

## SRM transitions

| Transition ID  | Precursor m/z | Precursor charge | Fragment m/z | Relative intensity |
|----------------|---------------|------------------|--------------|--------------------|
| DALDLIK.2.y1.1 | 415.237       | 2                | 147.113      | 100                |
| DALDLIK.2.y2.1 | 415.237       | 2                | 260.197      | 99                 |
| DALDLIK.2.y3.1 | 415.237       | 2                | 373.281      | 34                 |
| DALDLIK.2.y6.1 | 415.237       | 2                | 672.429      | 21                 |
| DALDLIK.2.b2.1 | 415.237       | 2                | 229.082      | 19                 |
| DALDLIK.2.b4.2 | 415.237       | 2                | 229.1        | 19                 |
| DALDLIK.2.y4.1 | 415.237       | 2                | 488.308      | 5                  |

## MS/MS spectrum

### Ions:

- 1<sup>+</sup>  2<sup>+</sup>  3<sup>+</sup>  
 1<sup>+</sup>  2<sup>+</sup>  3<sup>+</sup>

[\[Deselect All\]](#)

### Neutral Loss:

- H<sub>2</sub>O (o)  
 NH<sub>3</sub> (\*)

### Mass Type:

- Mono  Avg

Mass Tolerance:  Da

[Update](#)

### Peak Assignment:

- Most Intense  
 Nearest Match

### Peak Labels:

- Ion  m/z  
 None

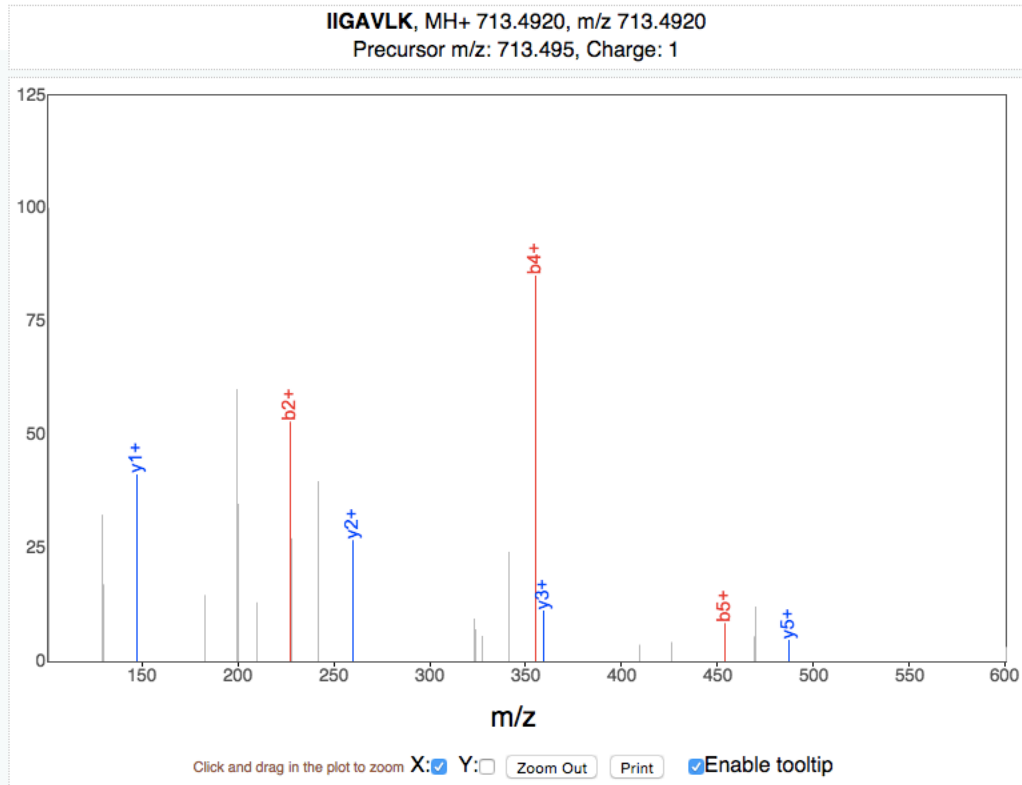

| b+              | Seq | y+                  |
|-----------------|-----|---------------------|
| 114.0913        | 1   | I 7                 |
| <b>227.1754</b> | 2   | I 6 600.4079        |
| 284.1969        | 3   | G 5 <b>487.3239</b> |
| <b>355.2340</b> | 4   | A 4 430.3024        |
| <b>454.3024</b> | 5   | V 3 <b>359.2653</b> |
| 567.3865        | 6   | L 2 <b>260.1969</b> |
|                 | 7   | K 1 <b>147.1128</b> |

## SRM transitions

| Transition ID  | Precursor m/z | Precursor charge | Fragment m/z | Relative intensity |
|----------------|---------------|------------------|--------------|--------------------|
| IIGAVLK.1.y1.1 | 755.503       | 1                | 147.113      | 100                |
| IIGAVLK.1.y2.1 | 755.503       | 1                | 260.197      | 64                 |
| IIGAVLK.1.y3.1 | 755.503       | 1                | 359.265      | 26                 |
| IIGAVLK.1.y5.1 | 755.503       | 1                | 487.324      | 10                 |
| IIGAVLK.1.y6.1 | 755.503       | 1                | 600.408      | 7                  |

MS/MS spectrum

Ions:

- a  1+  2+  3+
- b  1+  2+  3+
- c  1+  2+  3+
- x  1+  2+  3+
- y  1+  2+  3+
- z  1+  2+  3+

Neutral Loss:

- H<sub>2</sub>O (o)
- NH<sub>3</sub> (\*)

Mass Type:

- Mono  Avg

Mass Tolerance: 0.05 Da

[Update](#)

Peak Assignment:

- Most Intense
  - Nearest Match
- Peak Labels:
- Ion  m/z
  - None

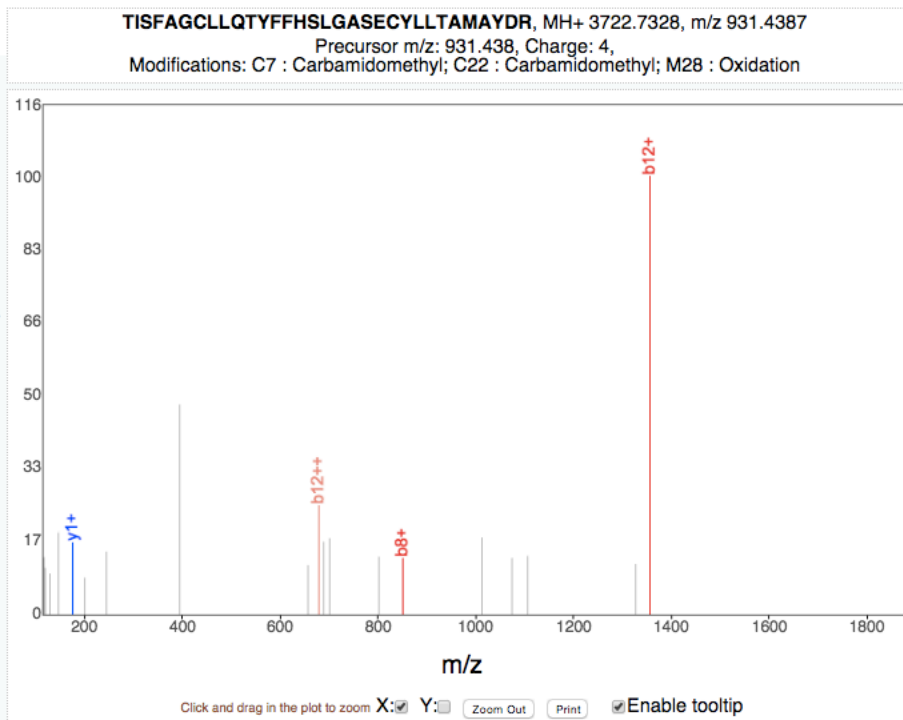

| b+               | b2+             | b3+       | Seq     | y+              | y2+       | y3+       |
|------------------|-----------------|-----------|---------|-----------------|-----------|-----------|
| 102.0550         | 51.5311         | 34.6898   | 1 T 32  |                 |           |           |
| 215.1390         | 108.0731        | 72.3845   | 2 I 31  | 3621.6851       | 1811.3462 | 1207.8999 |
| 302.1710         | 151.5892        | 101.3952  | 3 S 30  | 3508.6010       | 1754.8042 | 1170.2052 |
| 449.2395         | 225.1234        | 150.4180  | 4 F 29  | 3421.5690       | 1711.2881 | 1141.1945 |
| 520.2766         | 260.6419        | 174.0970  | 5 A 28  | 3274.5006       | 1637.7539 | 1092.1717 |
| 577.2980         | 289.1527        | 193.1042  | 6 G 27  | 3203.4635       | 1602.2354 | 1068.4927 |
| 737.3287         | 369.1680        | 246.4477  | 7 C 26  | 3146.4420       | 1573.7247 | 1049.4855 |
| <b>850.4128</b>  | 425.7100        | 284.1424  | 8 L 25  | 2986.4114       | 1493.7093 | 996.1420  |
| 963.4968         | 482.2520        | 321.8371  | 9 L 24  | 2873.3273       | 1437.1673 | 958.4473  |
| 1091.5554        | 546.2813        | 364.5233  | 10 Q 23 | 2760.2433       | 1380.6253 | 920.7526  |
| 1192.6031        | 596.8052        | 398.2059  | 11 T 22 | 2632.1847       | 1316.5960 | 878.0664  |
| <b>1355.6664</b> | <b>678.3368</b> | 452.5603  | 12 Y 21 | 2531.1370       | 1266.0721 | 844.3838  |
| 1502.7348        | 751.8710        | 501.5831  | 13 F 20 | 2368.0737       | 1184.5405 | 790.0294  |
| 1649.8032        | 825.4053        | 550.6059  | 14 F 19 | 2221.0053       | 1111.0063 | 741.0066  |
| 1786.8621        | 893.9347        | 596.2922  | 15 H 18 | 2073.9368       | 1037.4721 | 691.9838  |
| 1873.8942        | 937.4507        | 625.3029  | 16 S 17 | 1936.8779       | 968.9426  | 646.2975  |
| 1986.9782        | 993.9928        | 662.9976  | 17 L 16 | 1849.8459       | 925.4266  | 617.2868  |
| 2043.9997        | 1022.5035       | 682.0047  | 18 G 15 | 1736.7618       | 868.8846  | 579.5921  |
| 2115.0368        | 1058.0220       | 705.6838  | 19 A 14 | 1679.7404       | 840.3738  | 560.5850  |
| 2202.0688        | 1101.5381       | 734.6945  | 20 S 13 | 1608.7033       | 804.8553  | 536.9059  |
| 2331.1114        | 1166.0594       | 777.7087  | 21 E 12 | 1521.6712       | 761.3393  | 507.8953  |
| 2491.1421        | 1246.0747       | 831.0522  | 22 C 11 | 1392.6286       | 696.8180  | 464.8811  |
| 2654.2054        | 1327.6063       | 885.4067  | 23 Y 10 | 1232.5980       | 616.8026  | 411.5375  |
| 2767.2895        | 1384.1484       | 923.1013  | 24 L 9  | 1069.5347       | 535.2710  | 357.1831  |
| 2880.3735        | 1440.6904       | 960.7960  | 25 L 8  | 956.4506        | 478.7289  | 319.4884  |
| 2981.4212        | 1491.2142       | 994.4786  | 26 T 7  | 843.3665        | 422.1869  | 281.7937  |
| 3052.4583        | 1526.7328       | 1018.1576 | 27 A 6  | 742.3189        | 371.6631  | 248.1111  |
| 3199.4937        | 1600.2505       | 1067.1694 | 28 M 5  | 671.2817        | 336.1445  | 224.4321  |
| 3270.5308        | 1635.7691       | 1090.8485 | 29 A 4  | 524.2463        | 262.6268  | 175.4203  |
| 3433.5942        | 1717.3007       | 1145.2029 | 30 Y 3  | 453.2092        | 227.1082  | 151.7413  |
| 3548.6211        | 1774.8142       | 1183.5452 | 31 D 2  | 290.1459        | 145.5766  | 97.3868   |
|                  |                 |           | 32 R 1  | <b>175.1190</b> | 88.0631   | 59.0445   |

SRM transitions

| Transition ID                            | Precursor m/z | Precursor charge | Fragment m/z | Relative intensity |
|------------------------------------------|---------------|------------------|--------------|--------------------|
| TISFAGcLLQTYFFHSLGASEcYLLTAmAYDR.4.b12.1 | 931.439       | 4                | 1355.67      | 100                |
| TISFAGcLLQTYFFHSLGASEcYLLTAmAYDR.4.b12.2 | 931.439       | 4                | 678.337      | 24                 |
| TISFAGcLLQTYFFHSLGASEcYLLTAmAYDR.4.y1.1  | 931.439       | 4                | 175.119      | 16                 |
| TISFAGcLLQTYFFHSLGASEcYLLTAmAYDR.4.b8.1  | 931.439       | 4                | 850.413      | 12                 |

### MS/MS spectrum

#### Ions:

- 1+  2+  3+  
 1+  2+  3+  
 1+  2+  3+  
 1+  2+  3+  
 1+  2+  3+  
 1+  2+  3+

[Deselect All](#)

#### Neutral Loss:

- H<sub>2</sub>O (o)  
 NH<sub>3</sub> (\*)

#### Mass Type:

- Mono  Avg

Mass Tolerance: 0.05 Da

[Update](#)

#### Peak Assignment:

- Most Intense  
 Nearest Match

#### Peak Labels:

- Ion  m/z  
 None

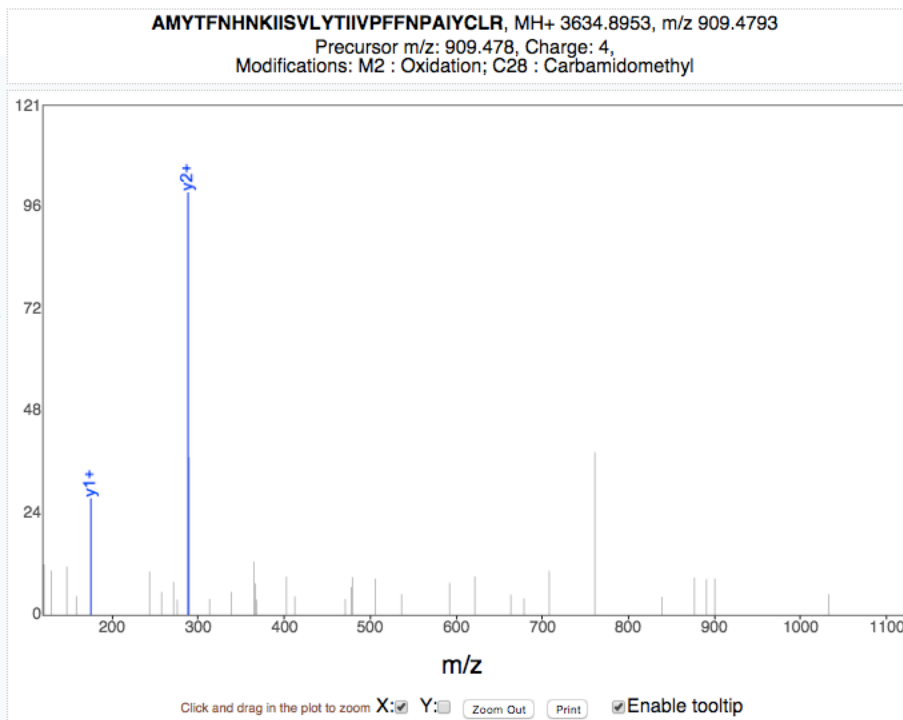

| b+        | b2+       | b3+       | Seq     | y+              | y2+       | y3+       |
|-----------|-----------|-----------|---------|-----------------|-----------|-----------|
| 72.0444   | 36.5258   | 24.6863   | 1 A 30  |                 |           |           |
| 219.0798  | 110.0435  | 73.6981   | 2 M 29  | 3563.8582       | 1782.4327 | 1188.6242 |
| 382.1431  | 191.5752  | 128.0526  | 3 Y 28  | 3416.8228       | 1708.9150 | 1139.6124 |
| 483.1908  | 242.0990  | 161.7351  | 4 T 27  | 3253.7595       | 1627.3834 | 1085.2580 |
| 630.2592  | 315.6332  | 210.7579  | 5 F 26  | 3152.7118       | 1576.8595 | 1051.5754 |
| 744.3021  | 372.6547  | 248.7722  | 6 N 25  | 3005.6434       | 1503.3253 | 1002.5526 |
| 881.3610  | 441.1842  | 294.4585  | 7 H 24  | 2891.6004       | 1446.3039 | 964.5383  |
| 995.4040  | 498.2056  | 332.4728  | 8 N 23  | 2754.5415       | 1377.7744 | 918.8520  |
| 1123.4989 | 562.2531  | 375.1712  | 9 K 22  | 2640.4986       | 1320.7529 | 880.8377  |
| 1236.5830 | 618.7951  | 412.8659  | 10 I 21 | 2512.4036       | 1256.7055 | 838.1394  |
| 1349.6671 | 675.3372  | 450.5605  | 11 I 20 | 2399.3196       | 1200.1634 | 800.4447  |
| 1436.6991 | 718.8532  | 479.5712  | 12 S 19 | 2286.2355       | 1143.6214 | 762.7500  |
| 1535.7675 | 768.3874  | 512.5940  | 13 V 18 | 2199.2035       | 1100.1054 | 733.7393  |
| 1648.8516 | 824.9294  | 550.2887  | 14 L 17 | 2100.1351       | 1050.5712 | 700.7165  |
| 1811.9149 | 906.4611  | 604.6432  | 15 Y 16 | 1987.0510       | 994.0291  | 663.0219  |
| 1912.9626 | 956.9849  | 638.3257  | 16 T 15 | 1823.9877       | 912.4975  | 608.6674  |
| 2026.0466 | 1013.5270 | 676.0204  | 17 I 14 | 1722.9400       | 861.9736  | 574.9848  |
| 2139.1307 | 1070.0690 | 713.7151  | 18 I 13 | 1609.8559       | 805.4316  | 537.2902  |
| 2238.1991 | 1119.6032 | 746.7379  | 19 V 12 | 1496.7719       | 748.8896  | 499.5955  |
| 2335.2519 | 1168.1296 | 779.0888  | 20 P 11 | 1397.7035       | 699.3554  | 466.5727  |
| 2482.3203 | 1241.6638 | 828.1116  | 21 F 10 | 1300.6507       | 650.8290  | 434.2217  |
| 2629.3887 | 1315.1980 | 877.1344  | 22 F 9  | 1153.5823       | 577.2948  | 385.1989  |
| 2743.4316 | 1372.2195 | 915.1487  | 23 N 8  | 1006.5139       | 503.7606  | 336.1761  |
| 2840.4844 | 1420.7458 | 947.4997  | 24 P 7  | 892.4709        | 446.7391  | 298.1618  |
| 2911.5215 | 1456.2644 | 971.1787  | 25 A 6  | 795.4182        | 398.2127  | 265.8109  |
| 3024.6056 | 1512.8064 | 1008.8734 | 26 I 5  | 724.3811        | 362.6942  | 242.1319  |
| 3187.6689 | 1594.3381 | 1063.2278 | 27 Y 4  | 611.2970        | 306.1521  | 204.4372  |
| 3347.6996 | 1674.3534 | 1116.5714 | 28 C 3  | 448.2337        | 224.6205  | 150.0827  |
| 3460.7836 | 1730.8955 | 1154.2661 | 29 L 2  | <b>288.2030</b> | 144.6051  | 96.7392   |
|           |           |           | 30 R 1  | <b>175.1190</b> | 88.0631   | 59.0445   |

### SRM transitions

| Transition ID                        | Precursor m/z | Precursor charge | Fragment m/z | Relative intensity |
|--------------------------------------|---------------|------------------|--------------|--------------------|
| AmYTFNHNKIISVLYTIIVPFNPALYcLR.4.y2.1 | 909.479       | 4                | 288.203      | 100                |
| AmYTFNHNKIISVLYTIIVPFNPALYcLR.4.y1.1 | 909.479       | 4                | 175.119      | 27                 |



## MS/MS spectrum

### Ions:

a  1+  2+  3+

b  1+  2+  3+

c  1+  2+  3+

x  1+  2+  3+

y  1+  2+  3+

z  1+  2+  3+

[Deselect All](#)

### Neutral Loss:

H<sub>2</sub>O (o)

NH<sub>3</sub> (\*)

Mass Type:

Mono  Avg

Mass Tolerance: 0.05 Da

[Update](#)

### Peak Assignment:

Most Intense

Nearest Match

### Peak Labels:

Ion  m/z

None

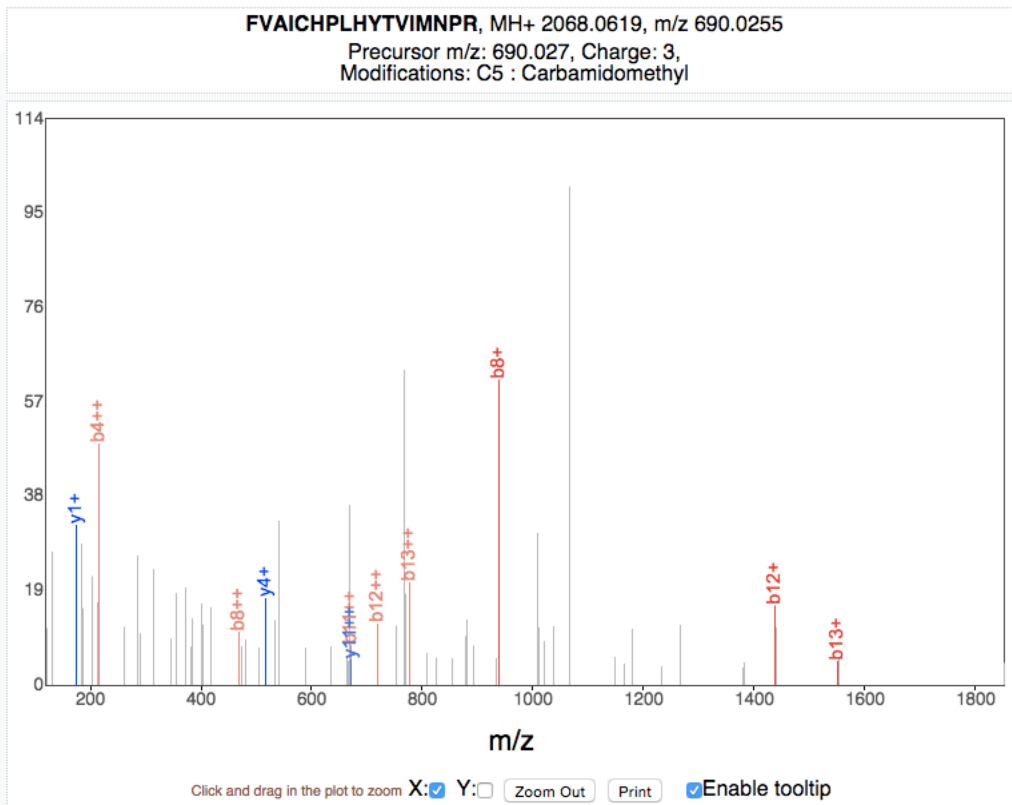

| b+               | b2+             | Seq    | y+              | y2+             |
|------------------|-----------------|--------|-----------------|-----------------|
| 148.0757         | 74.5415         | 1 F 17 |                 |                 |
| 247.1441         | 124.0757        | 2 V 16 | 1920.9935       | 961.0004        |
| 318.1812         | 159.5942        | 3 A 15 | 1821.9251       | 911.4662        |
| 431.2653         | <b>216.1363</b> | 4 I 14 | 1750.8880       | 875.9476        |
| 591.2959         | 296.1516        | 5 C 13 | 1637.8039       | 819.4056        |
| 728.3548         | 364.6811        | 6 H 12 | 1477.7733       | 739.3903        |
| 825.4076         | 413.2074        | 7 P 11 | 1340.7144       | <b>670.8608</b> |
| <b>938.4917</b>  | <b>469.7495</b> | 8 L 10 | 1243.6616       | 622.3344        |
| 1075.5506        | 538.2789        | 9 H 9  | 1130.5775       | 565.7924        |
| 1238.6139        | 619.8106        | 10 Y 8 | 993.5186        | 497.2629        |
| 1339.6616        | <b>670.3344</b> | 11 T 7 | 830.4553        | 415.7313        |
| <b>1438.7300</b> | <b>719.8686</b> | 12 V 6 | 729.4076        | 365.2074        |
| <b>1551.8141</b> | <b>776.4107</b> | 13 I 5 | 630.3392        | 315.6732        |
| 1682.8546        | 841.9309        | 14 M 4 | <b>517.2551</b> | 259.1312        |
| 1796.8975        | 898.9524        | 15 N 3 | 386.2146        | 193.6110        |
| 1893.9502        | 947.4788        | 16 P 2 | 272.1717        | 136.5895        |
|                  |                 | 17 R 1 | <b>175.1190</b> | 88.0631         |

## SRM transitions

| Transition ID             | Precursor m/z | Precursor charge | Fragment m/z | Relative intensity |
|---------------------------|---------------|------------------|--------------|--------------------|
| FVAICHPLHYTVIMNPR.3.b8.1  | 690.026       | 3                | 938.492      | 100                |
| FVAICHPLHYTVIMNPR.3.b4.2  | 690.026       | 3                | 216.136      | 79                 |
| FVAICHPLHYTVIMNPR.3.y1.1  | 690.026       | 3                | 175.119      | 52                 |
| FVAICHPLHYTVIMNPR.3.b13.2 | 690.026       | 3                | 776.411      | 33                 |
| FVAICHPLHYTVIMNPR.3.y4.1  | 690.026       | 3                | 517.255      | 28                 |
| FVAICHPLHYTVIMNPR.3.b12.1 | 690.026       | 3                | 1438.73      | 25                 |
| FVAICHPLHYTVIMNPR.3.b12.2 | 690.026       | 3                | 719.869      | 20                 |

MS/MS spectrum

Ions:

- a  1+  2+  3+
- b  1+  2+  3+
- c  1+  2+  3+
- x  1+  2+  3+
- y  1+  2+  3+
- z  1+  2+  3+

[\[Deselect All\]](#)

Neutral Loss:

- H<sub>2</sub>O (o)
- NH<sub>3</sub> (\*)

Mass Type:

- Mono  Avg

Mass Tolerance: 0.05 Da

[Update](#)

Peak Assignment:

- Most Intense
- Nearest Match

Peak Labels:

- Ion  m/z
- None

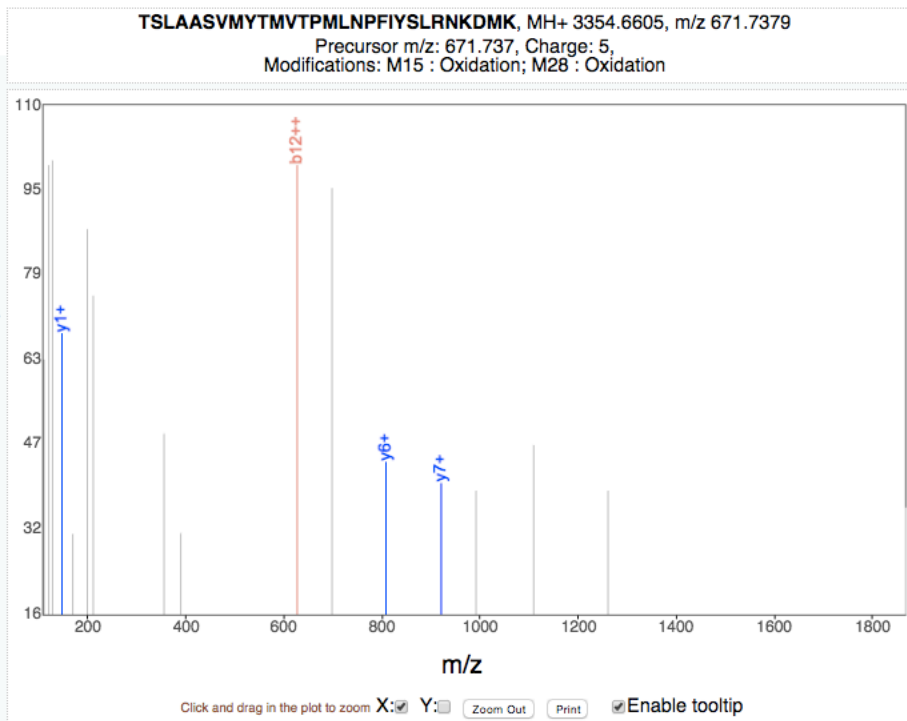

| b+        | b2+             | b3+       | Seq     | y+              | y2+       | y3+       |
|-----------|-----------------|-----------|---------|-----------------|-----------|-----------|
| 102.0550  | 51.5311         | 34.6898   | 1 T 29  |                 |           |           |
| 189.0870  | 95.0471         | 63.7005   | 2 S 28  | 3253.6128       | 1627.3100 | 1085.2091 |
| 302.1710  | 151.5892        | 101.3952  | 3 L 27  | 3166.5808       | 1583.7940 | 1056.1984 |
| 373.2082  | 187.1077        | 125.0742  | 4 A 26  | 3053.4967       | 1527.2520 | 1018.5038 |
| 444.2453  | 222.6263        | 148.7533  | 5 A 25  | 2982.4596       | 1491.7334 | 994.8247  |
| 531.2773  | 266.1423        | 177.7640  | 6 S 24  | 2911.4225       | 1456.2149 | 971.1457  |
| 630.3457  | 315.6765        | 210.7868  | 7 V 23  | 2824.3904       | 1412.6989 | 942.1350  |
| 761.3862  | 381.1967        | 254.4669  | 8 M 22  | 2725.3220       | 1363.1647 | 909.1122  |
| 924.4495  | 462.7284        | 308.8214  | 9 Y 21  | 2594.2816       | 1297.6444 | 865.4320  |
| 1025.4972 | 513.2522        | 342.5039  | 10 T 20 | 2431.2182       | 1216.1127 | 811.0776  |
| 1156.5377 | 578.7725        | 386.1841  | 11 M 19 | 2330.1705       | 1165.5889 | 777.3950  |
| 1255.6061 | <b>628.3067</b> | 419.2069  | 12 V 18 | 2199.1301       | 1100.0687 | 733.7149  |
| 1356.6538 | 678.8305        | 452.8894  | 13 T 17 | 2100.0616       | 1050.5345 | 700.6921  |
| 1453.7065 | 727.3569        | 485.2404  | 14 P 16 | 1999.0140       | 1000.0106 | 667.0095  |
| 1600.7419 | 800.8746        | 534.2522  | 15 M 15 | 1901.9612       | 951.4842  | 634.6586  |
| 1713.8260 | 857.4166        | 571.9469  | 16 L 14 | 1754.9258       | 877.9665  | 585.6468  |
| 1827.8689 | 914.4381        | 609.9612  | 17 N 13 | 1641.8417       | 821.4245  | 547.9521  |
| 1924.9217 | 962.9645        | 642.3121  | 18 P 12 | 1527.7988       | 764.4030  | 509.9378  |
| 2071.9901 | 1036.4987       | 691.3349  | 19 F 11 | 1430.7460       | 715.8767  | 477.5869  |
| 2185.0742 | 1093.0407       | 729.0296  | 20 I 10 | 1283.6776       | 642.3425  | 428.5641  |
| 2348.1375 | 1174.5724       | 783.3840  | 21 Y 9  | 1170.5936       | 585.8004  | 390.8694  |
| 2435.1695 | 1218.0884       | 812.3947  | 22 S 8  | 1007.5302       | 504.2688  | 336.5149  |
| 2548.2536 | 1274.6304       | 850.0894  | 23 L 7  | <b>920.4982</b> | 460.7527  | 307.5043  |
| 2704.3547 | 1352.6810       | 902.1231  | 24 R 6  | <b>807.4141</b> | 404.2107  | 269.8096  |
| 2818.3976 | 1409.7025       | 940.1374  | 25 N 5  | 651.3130        | 326.1602  | 217.7759  |
| 2946.4926 | 1473.7499       | 982.8357  | 26 K 4  | 537.2701        | 269.1387  | 179.7616  |
| 3061.5195 | 1531.2634       | 1021.1780 | 27 D 3  | 409.1751        | 205.0912  | 137.0632  |
| 3208.5549 | 1604.7811       | 1070.1898 | 28 M 2  | 294.1482        | 147.5777  | 98.7209   |
|           |                 |           | 29 K 1  | <b>147.1128</b> | 74.0600   | 49.7091   |

SRM transitions

| Transition ID                         | Precursor m/z | Precursor charge | Fragment m/z | Relative intensity |
|---------------------------------------|---------------|------------------|--------------|--------------------|
| TSLAASVMYTMVTPmLNPFIYSLRNKDMK.5.b12.2 | 671.738       | 5                | 628.307      | 100                |
| TSLAASVMYTMVTPmLNPFIYSLRNKDMK.5.y1.1  | 671.738       | 5                | 147.113      | 68                 |
| TSLAASVMYTMVTPmLNPFIYSLRNKDMK.5.y6.1  | 671.738       | 5                | 807.414      | 44                 |
| TSLAASVMYTMVTPmLNPFIYSLRNKDMK.5.y7.1  | 671.738       | 5                | 920.498      | 40                 |

## MS/MS spectrum

### Ions:

a  1+  2+  3+

b  1+  2+  3+

c  1+  2+  3+

x  1+  2+  3+

y  1+  2+  3+

z  1+  2+  3+

[Deselect All](#)

### Neutral Loss:

H<sub>2</sub>O (o)

NH<sub>3</sub> (\*)

### Mass Type:

Mono  Avg

Mass Tolerance:  Da

### Peak Assignment:

Most Intense

Nearest Match

### Peak Labels:

Ion  m/z

None

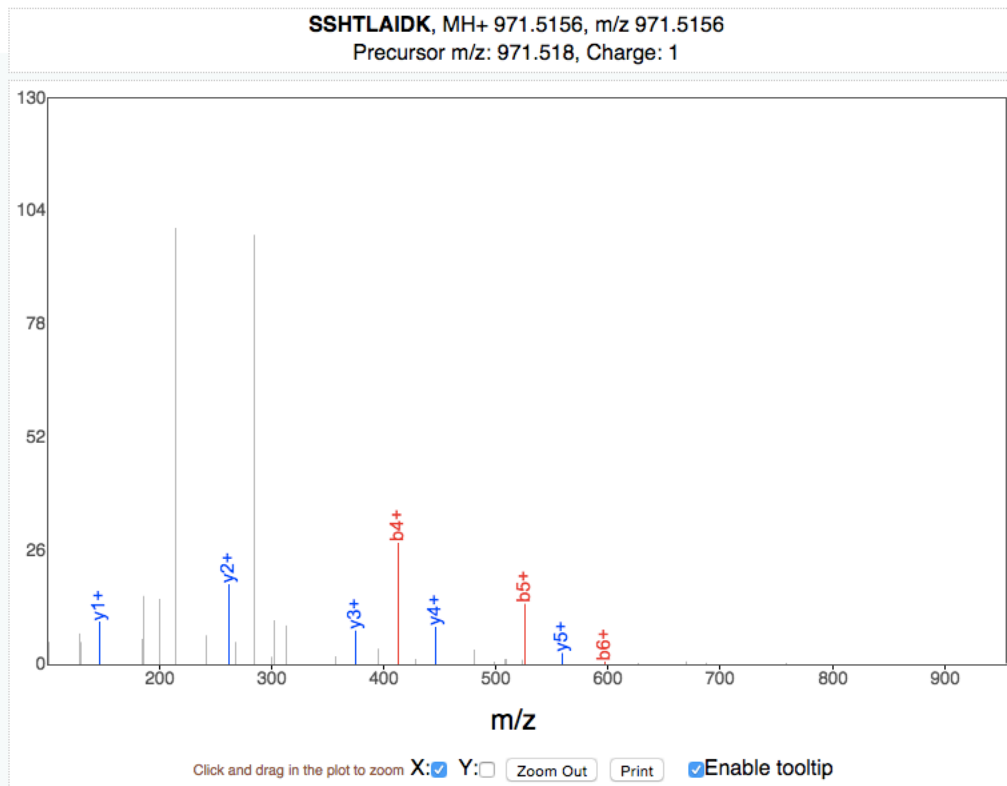

| b+       | Seq            | y+ |
|----------|----------------|----|
| 88.0393  | 1 S 9          |    |
| 175.0713 | 2 S 8 884.4836 |    |
| 312.1302 | 3 H 7 797.4516 |    |
| 413.1779 | 4 T 6 660.3927 |    |
| 526.2620 | 5 L 5 559.3450 |    |
| 597.2991 | 6 A 4 446.2609 |    |
| 710.3832 | 7 I 3 375.2238 |    |
| 825.4101 | 8 D 2 262.1397 |    |
|          | 9 K 1 147.1128 |    |

## SRM transitions

| Transition ID    | Precursor m/z | Precursor charge | Fragment m/z | Relative intensity |
|------------------|---------------|------------------|--------------|--------------------|
| SSHTLAIDK.1.y2.1 | 1013.53       | 1                | 262.14       | 100                |
| SSHTLAIDK.1.y1.1 | 1013.53       | 1                | 147.113      | 52                 |
| SSHTLAIDK.1.y4.1 | 1013.53       | 1                | 446.261      | 46                 |
| SSHTLAIDK.1.y3.1 | 1013.53       | 1                | 375.224      | 42                 |
| SSHTLAIDK.1.b1.1 | 1013.53       | 1                | 130.05       | 27                 |
| SSHTLAIDK.1.y5.1 | 1013.53       | 1                | 559.345      | 13                 |
| SSHTLAIDK.1.b9.2 | 1013.53       | 1                | 498.261      | 2                  |

## MS/MS spectrum

### Ions:

- 1<sup>+</sup>  2<sup>+</sup>  3<sup>+</sup>  
 1<sup>+</sup>  2<sup>+</sup>  3<sup>+</sup>

[\[Deselect All\]](#)

### Neutral Loss:

- H<sub>2</sub>O (o)  
 NH<sub>3</sub> (\*)

### Mass Type:

- Mono  Avg

Mass Tolerance:  Da

### Peak Assignment:

- Most Intense  
 Nearest Match

### Peak Labels:

- Ion  m/z  
 None

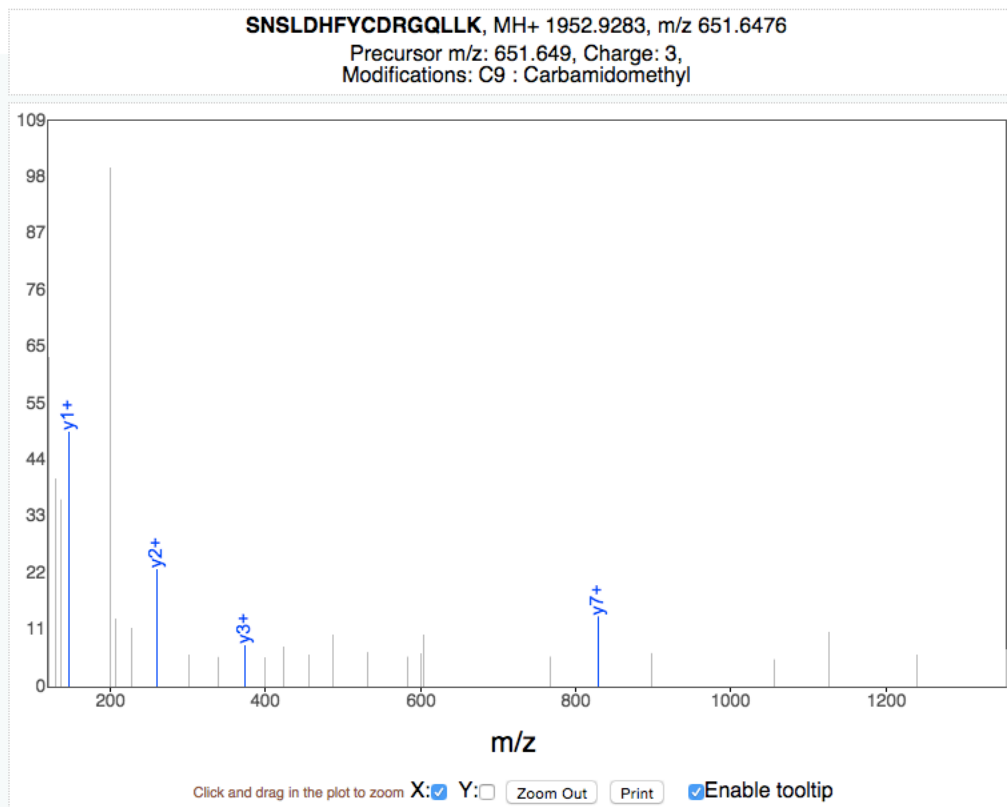

| b+        | b2+      | Seq    | y+              | y2+      |
|-----------|----------|--------|-----------------|----------|
| 88.0393   | 44.5233  | 1 S 16 |                 |          |
| 202.0822  | 101.5448 | 2 N 15 | 1865.8963       | 933.4518 |
| 289.1143  | 145.0608 | 3 S 14 | 1751.8534       | 876.4303 |
| 402.1983  | 201.6028 | 4 L 13 | 1664.8213       | 832.9143 |
| 517.2253  | 259.1163 | 5 D 12 | 1551.7373       | 776.3723 |
| 654.2842  | 327.6457 | 6 H 11 | 1436.7103       | 718.8588 |
| 801.3526  | 401.1799 | 7 F 10 | 1299.6514       | 650.3293 |
| 964.4159  | 482.7116 | 8 Y 9  | 1152.5830       | 576.7951 |
| 1124.4466 | 562.7269 | 9 C 8  | 989.5197        | 495.2635 |
| 1239.4735 | 620.2404 | 10 D 7 | <b>829.4890</b> | 415.2482 |
| 1395.5746 | 698.2910 | 11 R 6 | 714.4621        | 357.7347 |
| 1452.5961 | 726.8017 | 12 G 5 | 558.3610        | 279.6841 |
| 1580.6547 | 790.8310 | 13 Q 4 | 501.3395        | 251.1734 |
| 1693.7387 | 847.3730 | 14 L 3 | <b>373.2809</b> | 187.1441 |
| 1806.8228 | 903.9150 | 15 L 2 | <b>260.1969</b> | 130.6021 |
|           |          | 16 K 1 | <b>147.1128</b> | 74.0600  |

## SRM transitions

| Transition ID           | Precursor m/z | Precursor charge | Fragment m/z | Relative intensity |
|-------------------------|---------------|------------------|--------------|--------------------|
| SNSLDHFYcDRGQLLK.3.y1.1 | 651.648       | 3                | 147.113      | 100                |
| SNSLDHFYcDRGQLLK.3.y2.1 | 651.648       | 3                | 260.197      | 45                 |
| SNSLDHFYcDRGQLLK.3.y7.1 | 651.648       | 3                | 829.489      | 27                 |
| SNSLDHFYcDRGQLLK.3.y3.1 | 651.648       | 3                | 373.281      | 16                 |

### MS/MS spectrum

#### Ions:

- 1<sup>+</sup>  2<sup>+</sup>  3<sup>+</sup>  
 1<sup>+</sup>  2<sup>+</sup>  3<sup>+</sup>

[Deselect All]

#### Neutral Loss:

- H<sub>2</sub>O (o)  
 NH<sub>3</sub> (\*)

#### Mass Type:

- Mono  Avg

Mass Tolerance: 0.05 Da

Update

#### Peak Assignment:

- Most Intense  
 Nearest Match

#### Peak Labels:

- Ion  m/z  
 None

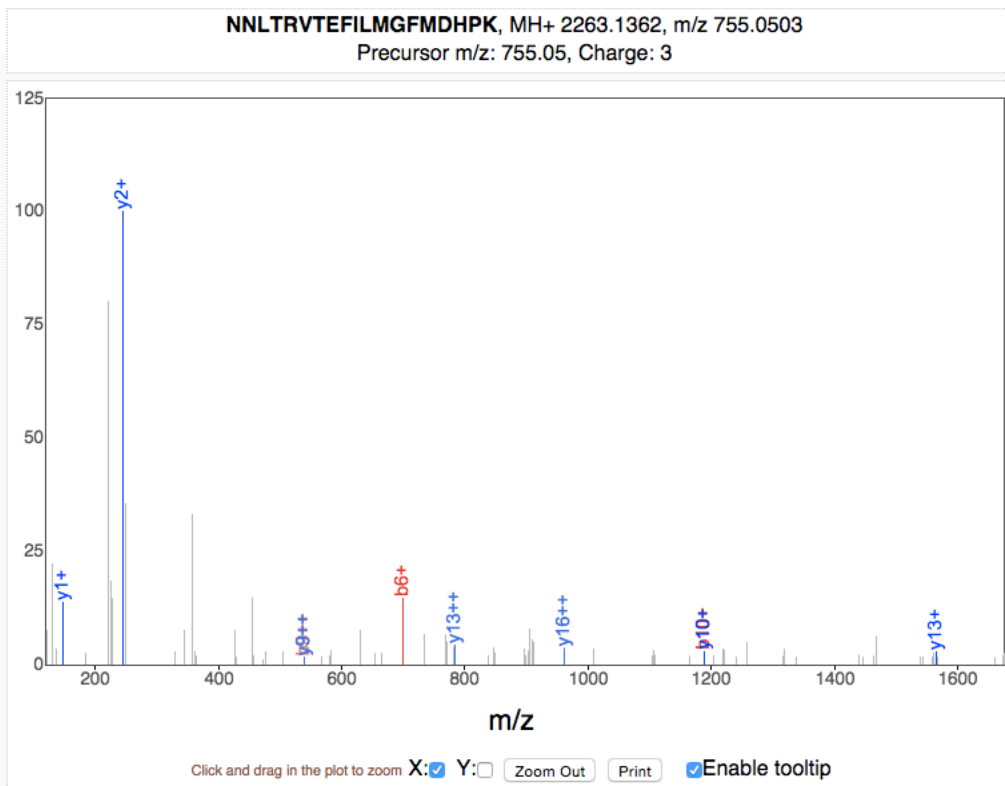

| b+               | b2+             | Seq |   | y+ | y2+                              |
|------------------|-----------------|-----|---|----|----------------------------------|
| 115.0502         | 58.0287         | 1   | N | 19 |                                  |
| 229.0931         | 115.0502        | 2   | N | 18 | 2149.0933 1075.0503              |
| 342.1772         | 171.5922        | 3   | L | 17 | 2035.0504 1018.0288              |
| 443.2249         | 222.1161        | 4   | T | 16 | 1921.9663 961.4868               |
| 599.3260         | 300.1666        | 5   | R | 15 | 1820.9186 910.9629               |
| <b>698.3944</b>  | 349.7008        | 6   | V | 14 | 1664.8175 832.9124               |
| 799.4421         | 400.2247        | 7   | T | 13 | <b>1565.7491</b> <b>783.3782</b> |
| 928.4847         | 464.7460        | 8   | E | 12 | 1464.7014 732.8543               |
| 1075.5531        | <b>538.2802</b> | 9   | F | 11 | 1335.6588 668.3330               |
| <b>1188.6371</b> | 594.8222        | 10  | I | 10 | <b>1188.5904</b> 594.7988        |
| 1301.7212        | 651.3642        | 11  | L | 9  | 1075.5063 <b>538.2568</b>        |
| 1432.7617        | 716.8845        | 12  | M | 8  | 962.4223 481.7148                |
| 1489.7832        | 745.3952        | 13  | G | 7  | 831.3818 416.1945                |
| 1636.8516        | 818.9294        | 14  | F | 6  | 774.3603 387.6838                |
| 1767.8921        | 884.4497        | 15  | M | 5  | 627.2919 314.1496                |
| 1882.9190        | 941.9631        | 16  | D | 4  | 496.2514 248.6293                |
| 2019.9779        | 1010.4926       | 17  | H | 3  | 381.2245 191.1159                |
| 2117.0307        | 1059.0190       | 18  | P | 2  | <b>244.1656</b> 122.5864         |
|                  |                 | 19  | K | 1  | <b>147.1128</b> 74.0600          |

### SRM transitions

| Transition ID               | Precursor m/z | Precursor charge | Fragment m/z | Relative intensity |
|-----------------------------|---------------|------------------|--------------|--------------------|
| NNLTRVTEFILMGFMDHPK.3.y2.1  | 769.054       | 3                | 244.166      | 100                |
| NNLTRVTEFILMGFMDHPK.3.y1.1  | 769.054       | 3                | 147.113      | 13                 |
| NNLTRVTEFILMGFMDHPK.3.y13.2 | 769.054       | 3                | 783.378      | 4                  |
| NNLTRVTEFILMGFMDHPK.3.y16.2 | 769.054       | 3                | 961.487      | 3                  |
| NNLTRVTEFILMGFMDHPK.3.b2.2  | 769.054       | 3                | 136.055      | 3                  |
| NNLTRVTEFILMGFMDHPK.3.y10.1 | 769.054       | 3                | 1188.59      | 2                  |
| NNLTRVTEFILMGFMDHPK.3.y13.1 | 769.054       | 3                | 1565.75      | 2                  |
